# Supplementary material
Source: PubMed Central journal article supplement (PMC8274396)

## Magnesium-promoted Additions of Difluoroenolates to Unactivated Imines

Alex L. Nguyen,<sup>†</sup> Hari R. Khatri,<sup>†</sup> James R. Woods,<sup>‡</sup> Cassidy S. Baldwin,<sup>†</sup> Frank R. Fronczek,<sup>§</sup>  
and David A. Colby<sup>\*†</sup>

<sup>†</sup> Department of BioMolecular Sciences, University of Mississippi, University, Mississippi 38677, United States, <sup>‡</sup> Department of Medicinal Chemistry and Molecular Pharmacology, Purdue University, West Lafayette, Indiana, 47907, United States, and <sup>§</sup> Department of Chemistry, Louisiana State University, Baton Rouge, Louisiana 70803, United States

### Table of Contents:

|                                      |    |
|--------------------------------------|----|
| I. X-ray Experimental.....           | S1 |
| II. X-ray Crystallographic Data..... | S2 |
| III. Spectral Data.....              | S4 |

### I. X-ray Experimental

Diffraction data were collected at low temperature (90K) with MoK $\alpha$  ( $\lambda=0.71073$  Å) for **30** and **31** or CuK $\alpha$  radiation ( $\lambda=1.54184$  Å) for **32** on a Bruker Kappa Apex-II DUO diffractometer. Refinement was by full-matrix least squares using SHELXL2014/7. H atoms were visible in difference maps, but were placed in idealized positions in the refinements except for those on N, for which positions were refined. Approximately 50:50 disorder of the naphthyl group was present in **31**. The crystal of **31** was a twin, and the crystal of **32** was also a twin with two independent molecules present in the asymmetric unit. Crystal data: for **30**: C<sub>25</sub>H<sub>19</sub>F<sub>2</sub>NO, monoclinic P2<sub>1</sub>/c, a=5.7571(4), b=18.4857(13), c=17.5890(13) Å,  $\beta=94.410(4)^\circ$ , Z=4,  $\mu(\text{MoK}\alpha)=0.10$  mm<sup>-1</sup>,  $\theta_{\text{max}}=30.6^\circ$ , 5689 independent data, 265 variables, R=0.057, CCDC 1816639; for **31**: C<sub>26</sub>H<sub>21</sub>F<sub>2</sub>NO<sub>2</sub>, triclinic P-1, a=5.6561(3), b=9.7402(4), c=19.2384(9) Å,  $\alpha=102.673(3)$ ,  $\beta=96.750(3)$ ,  $\gamma=97.299(3)^\circ$ , Z=2,  $\mu(\text{MoK}\alpha)=0.10$  mm<sup>-1</sup>,  $\theta_{\text{max}}=28.4^\circ$ , 14427 independent data, 352 variables, R=0.051, CCDC 1816640; for **32**: C<sub>27</sub>H<sub>22</sub>F<sub>3</sub>NO, triclinic P-1, a=10.1332(6), b=10.5209(5), c=20.5621(10) Å,  $\alpha=77.223(3)$ ,  $\beta=81.352(4)$ ,  $\gamma=89.909(3)^\circ$ , Z=4,  $\mu(\text{CuK}\alpha)=0.84$  mm<sup>-1</sup>,  $\theta_{\text{max}}=68.3^\circ$ , 7629 independent data, 587 variables, R=0.116, CCDC 1816641.

## II. X-ray Crystallographic Data

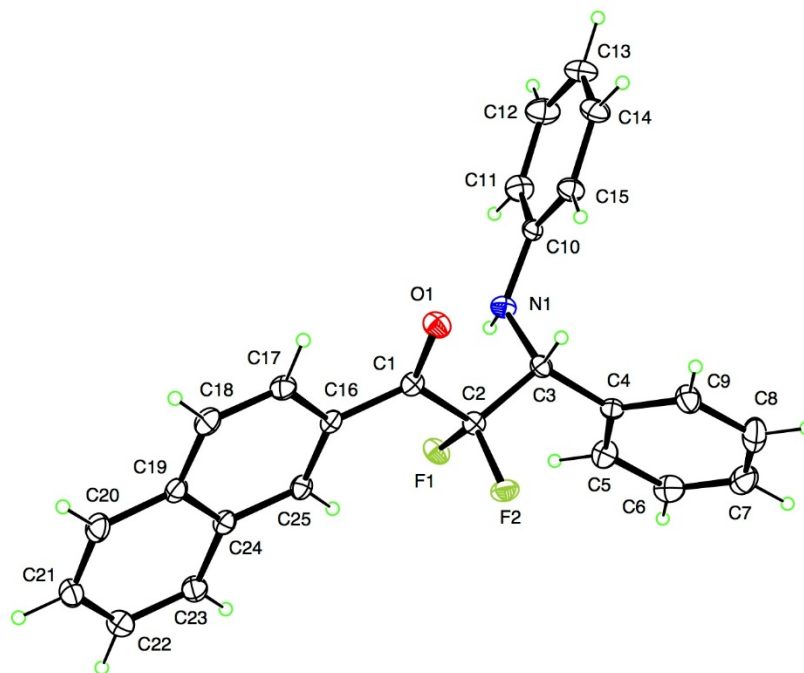

**Figure S1.** ORTEP Diagram of **30** with 50% ellipsoids.

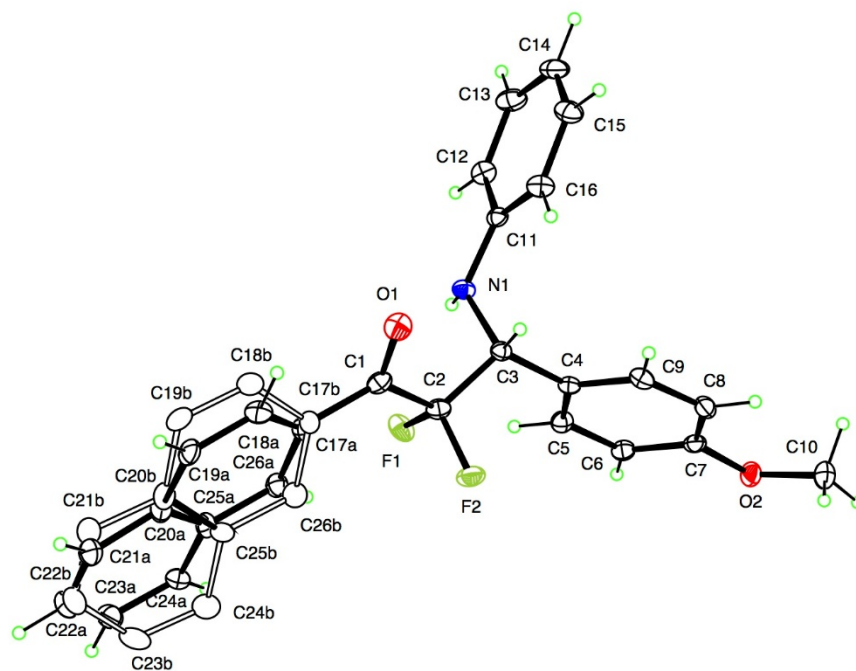

**Figure S2.** ORTEP Diagram of **31**. with 50% ellipsoids, showing disorder of naphthyl group.

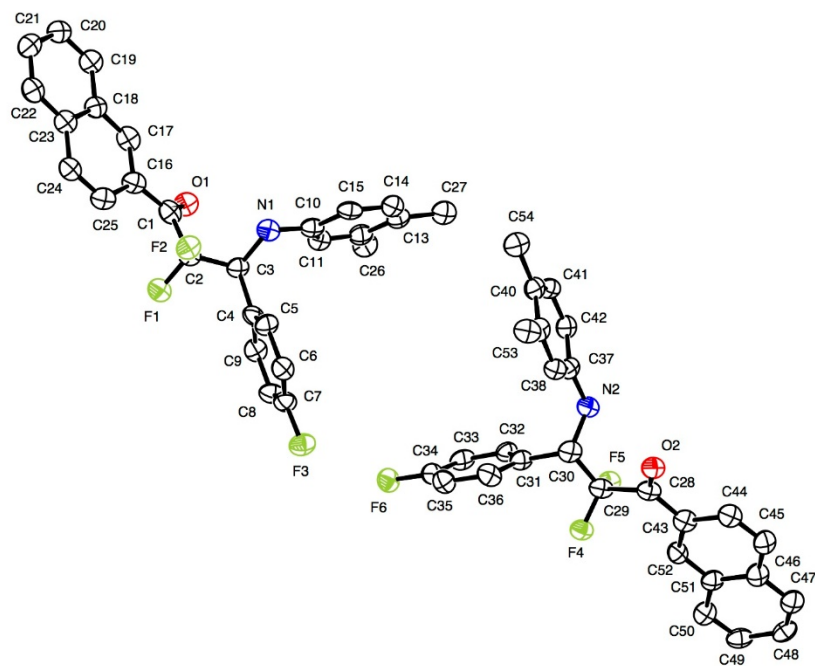

**Figure S3.** ORTEP Diagram of **32** with 50% ellipsoids. H atoms are not shown.

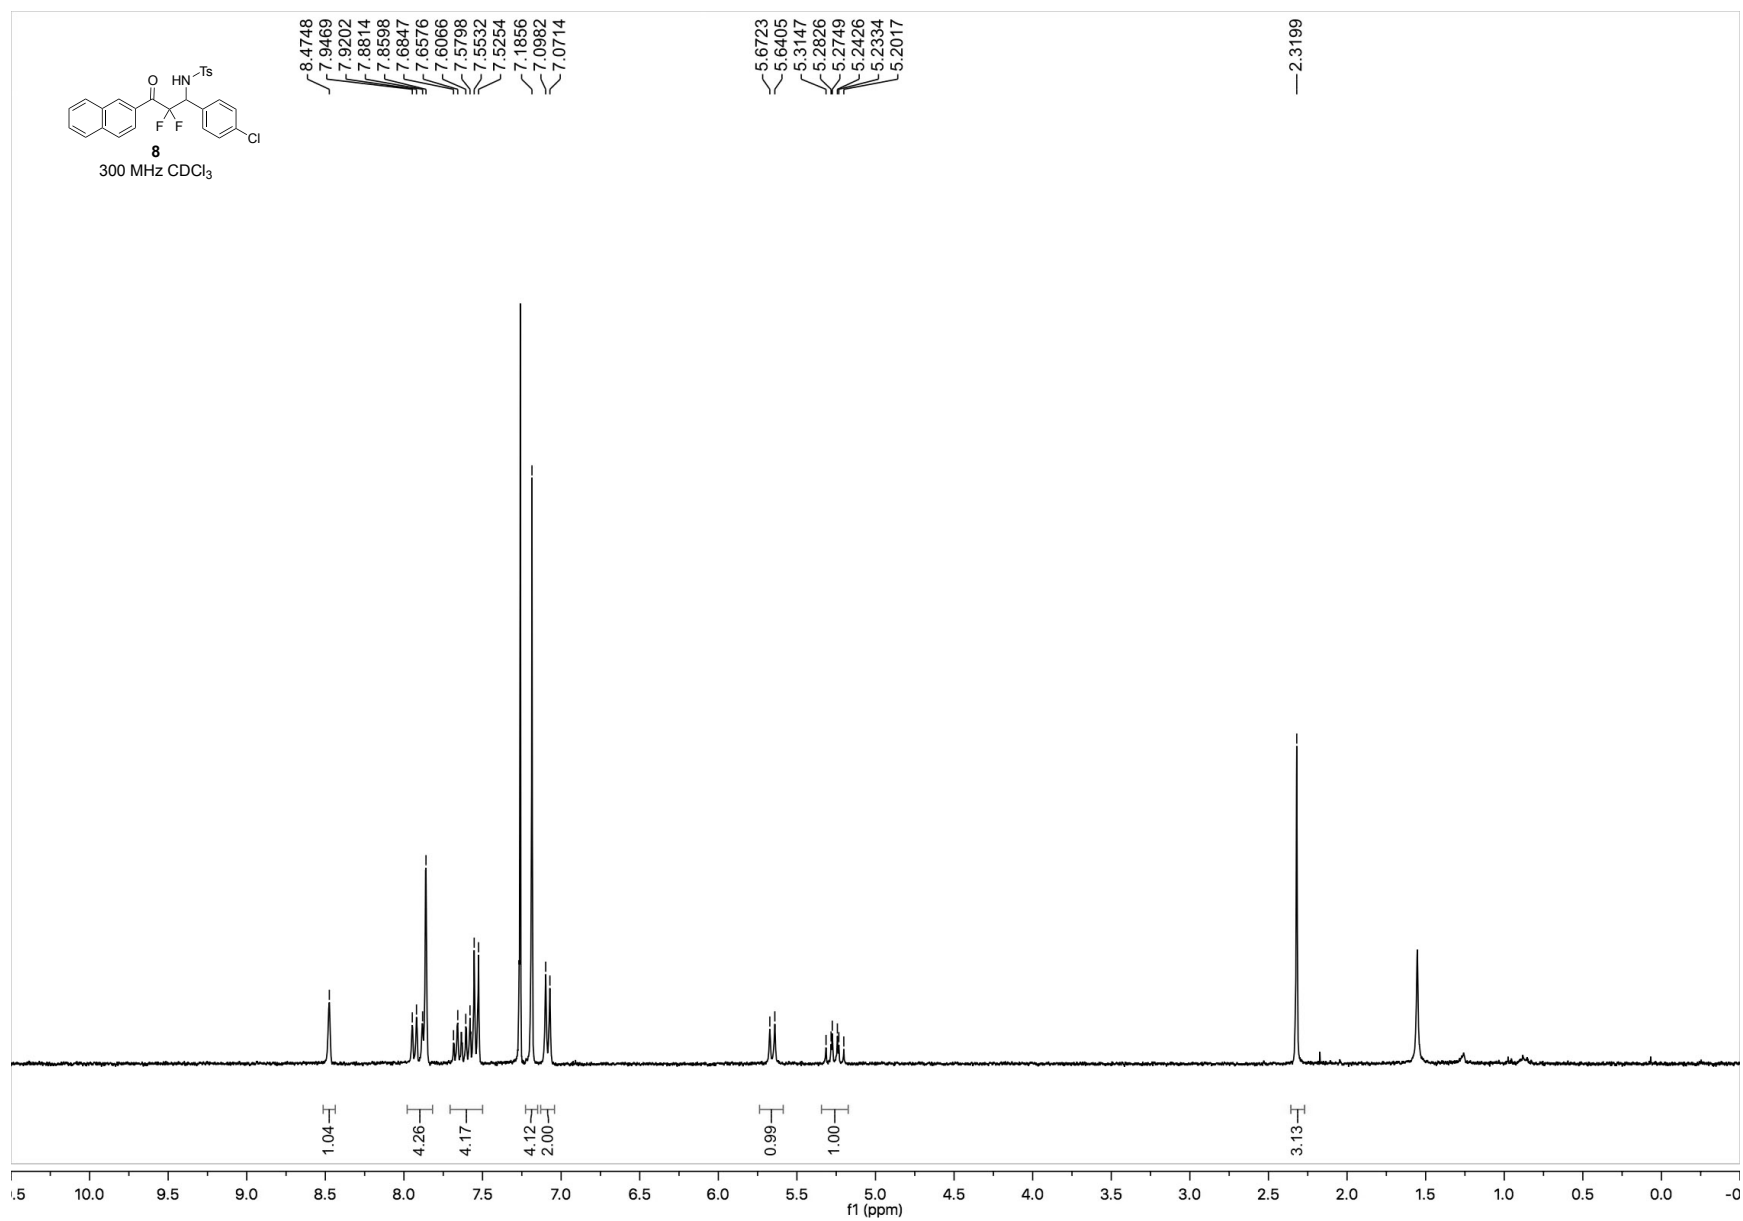



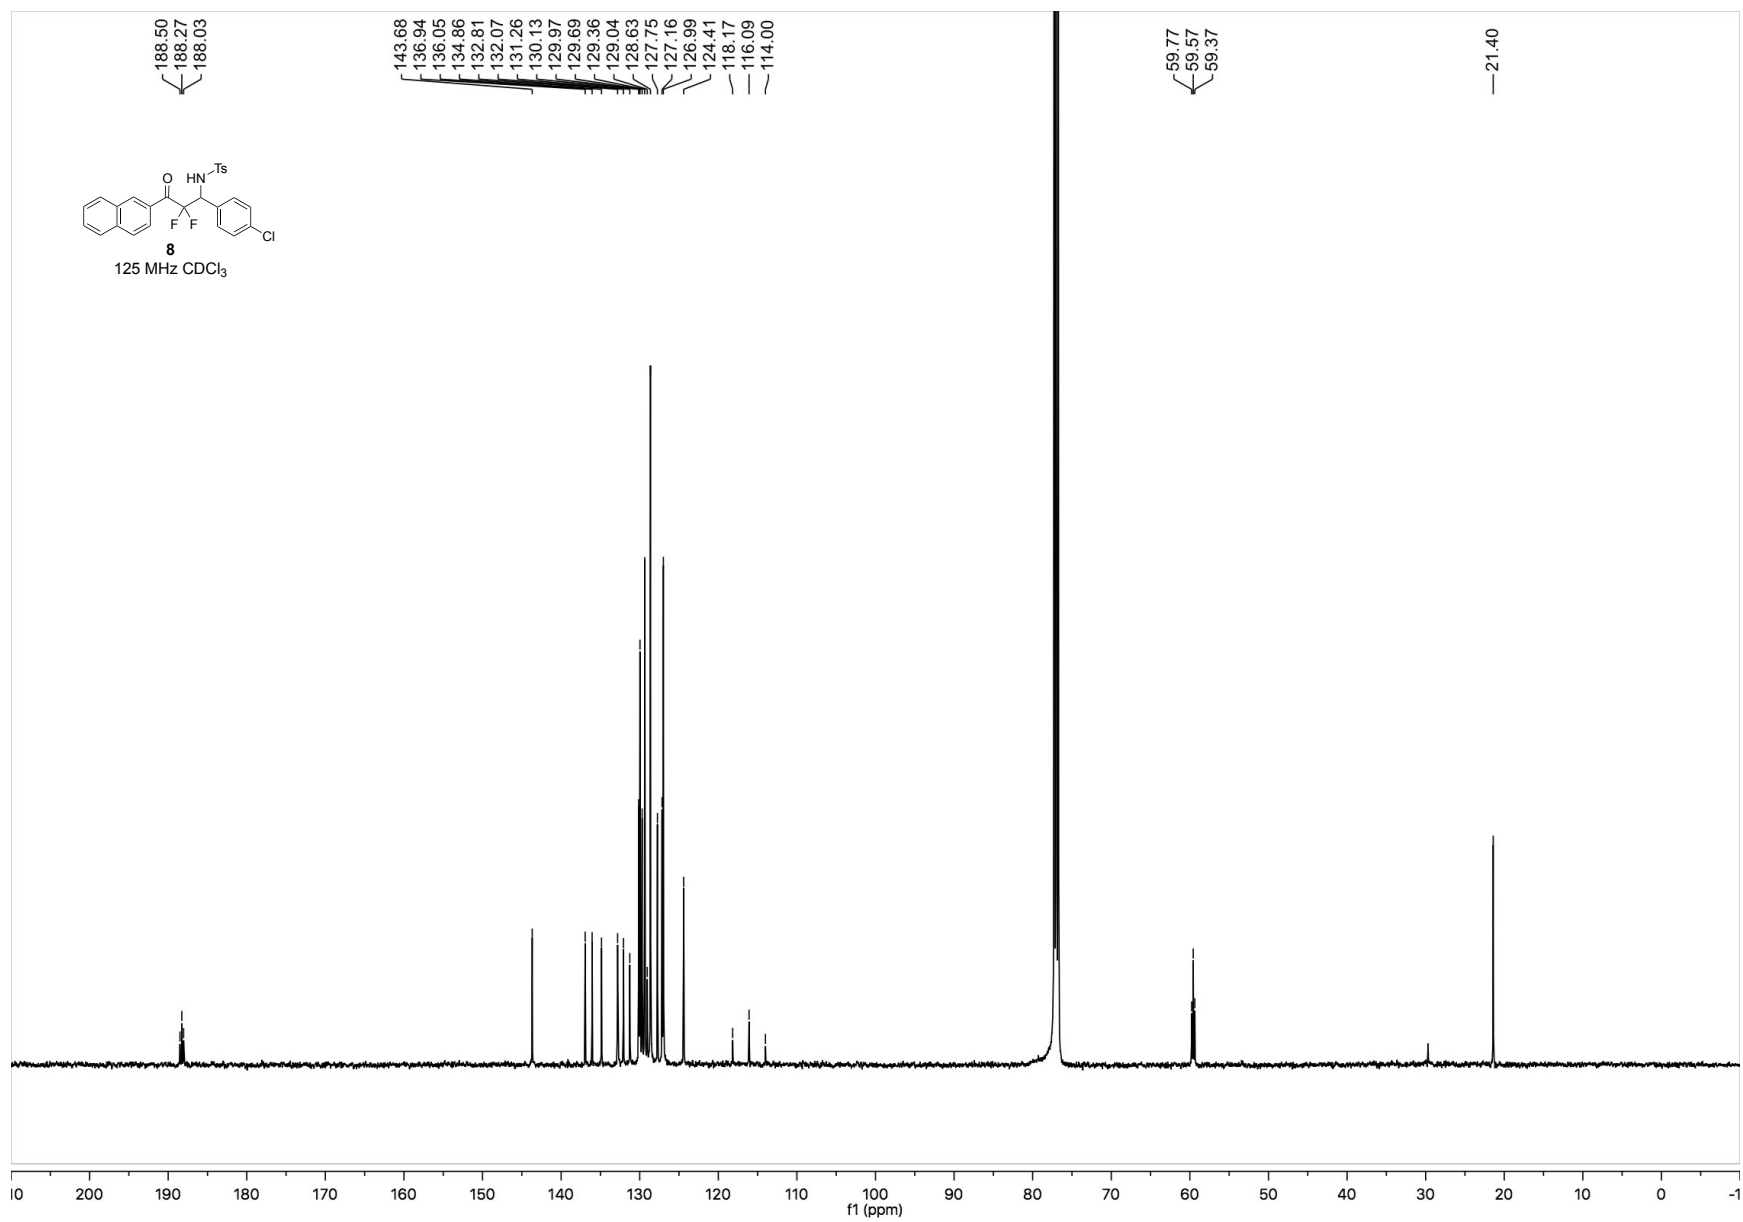

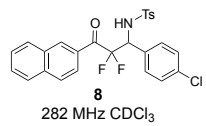

-103.344  
-103.385  
-104.349  
-104.391  
-105.397  
-105.441  
-106.403  
-106.447

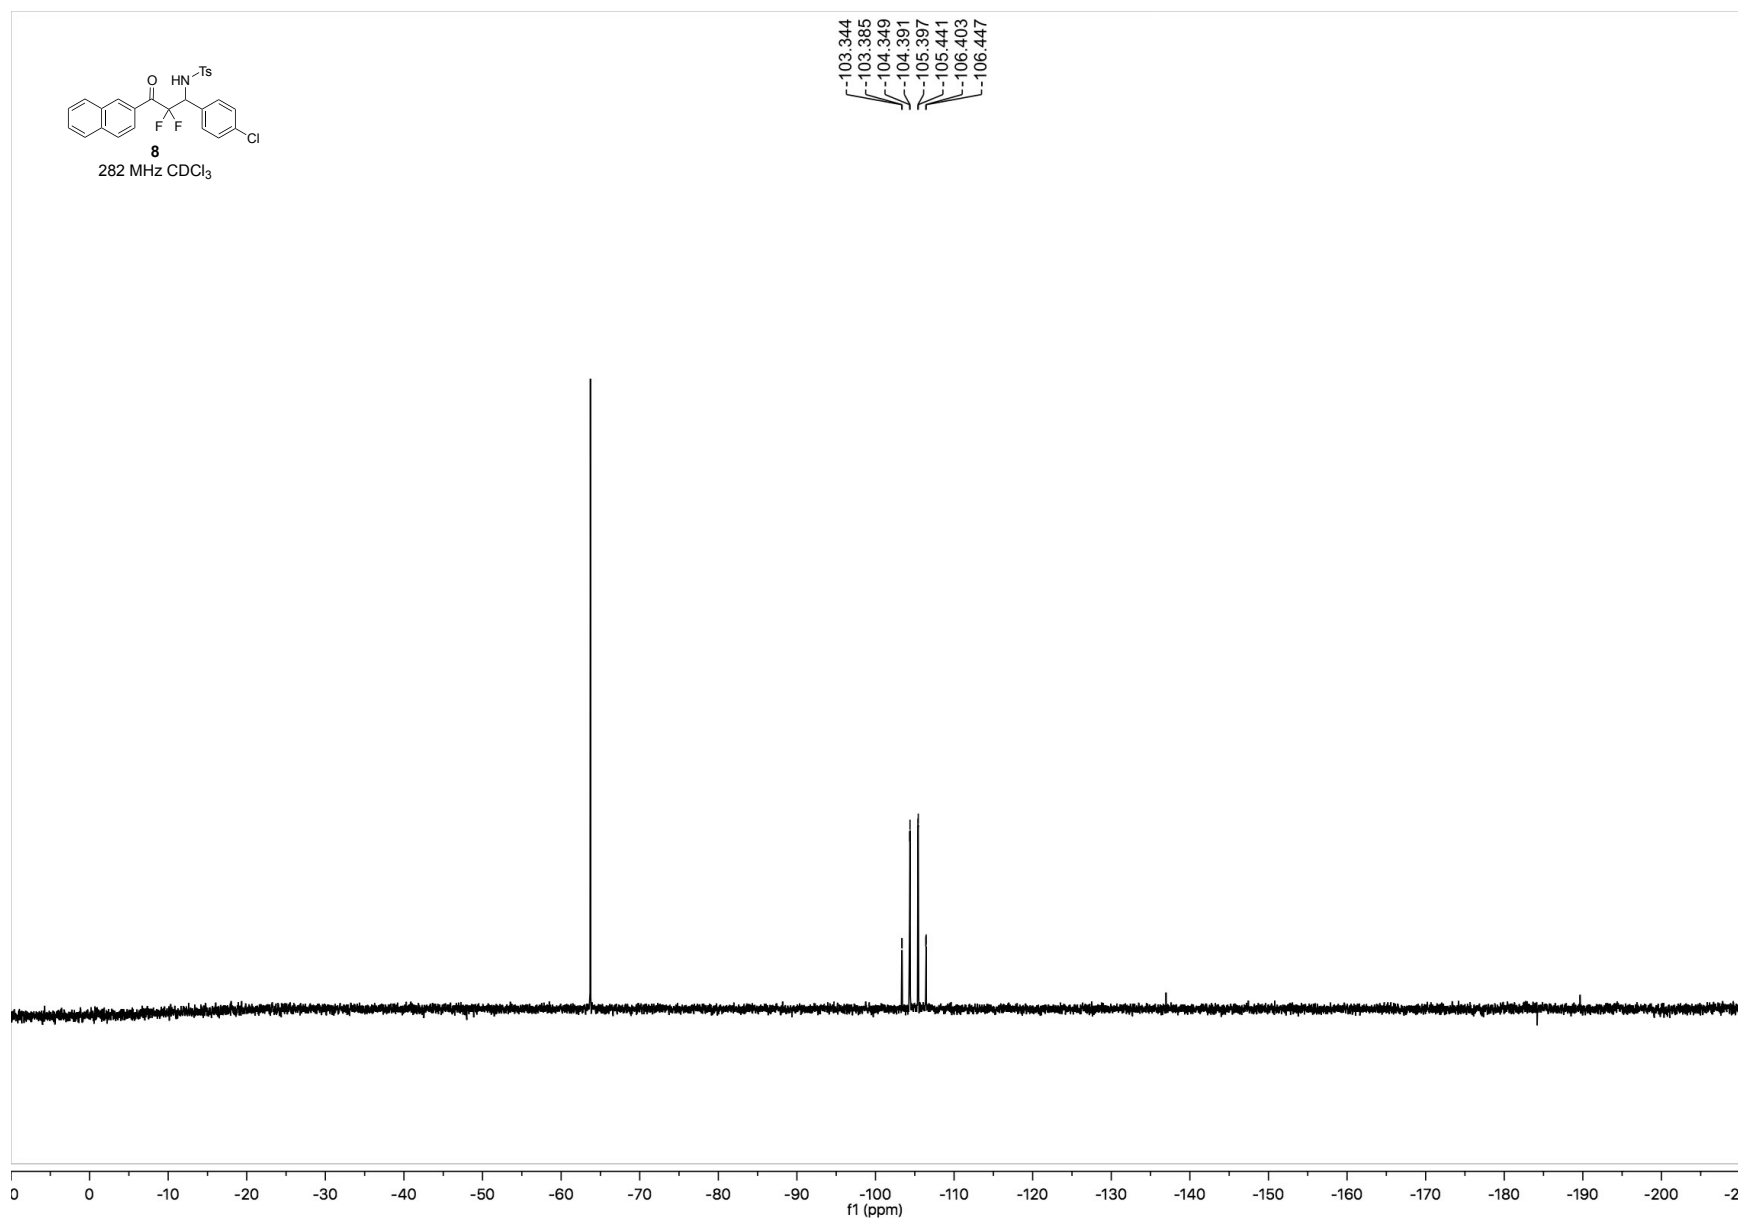

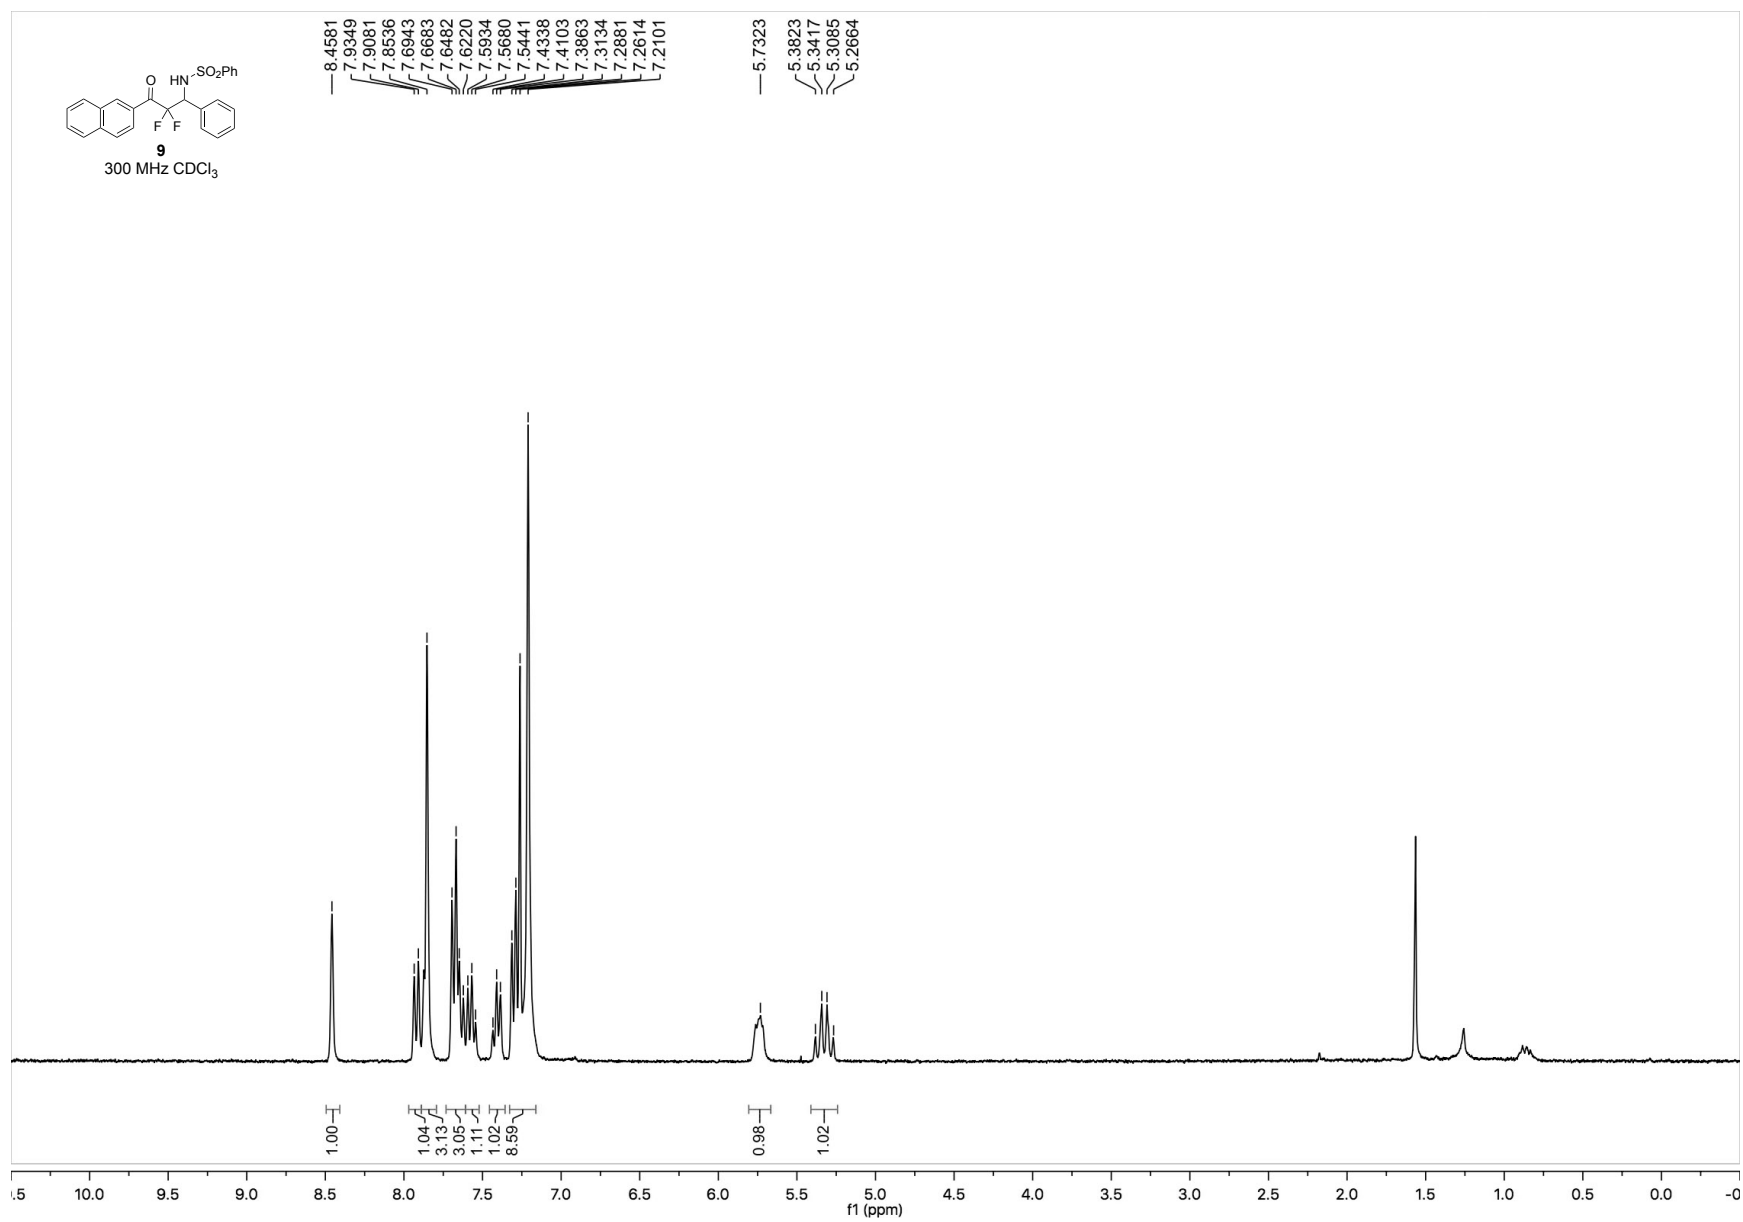

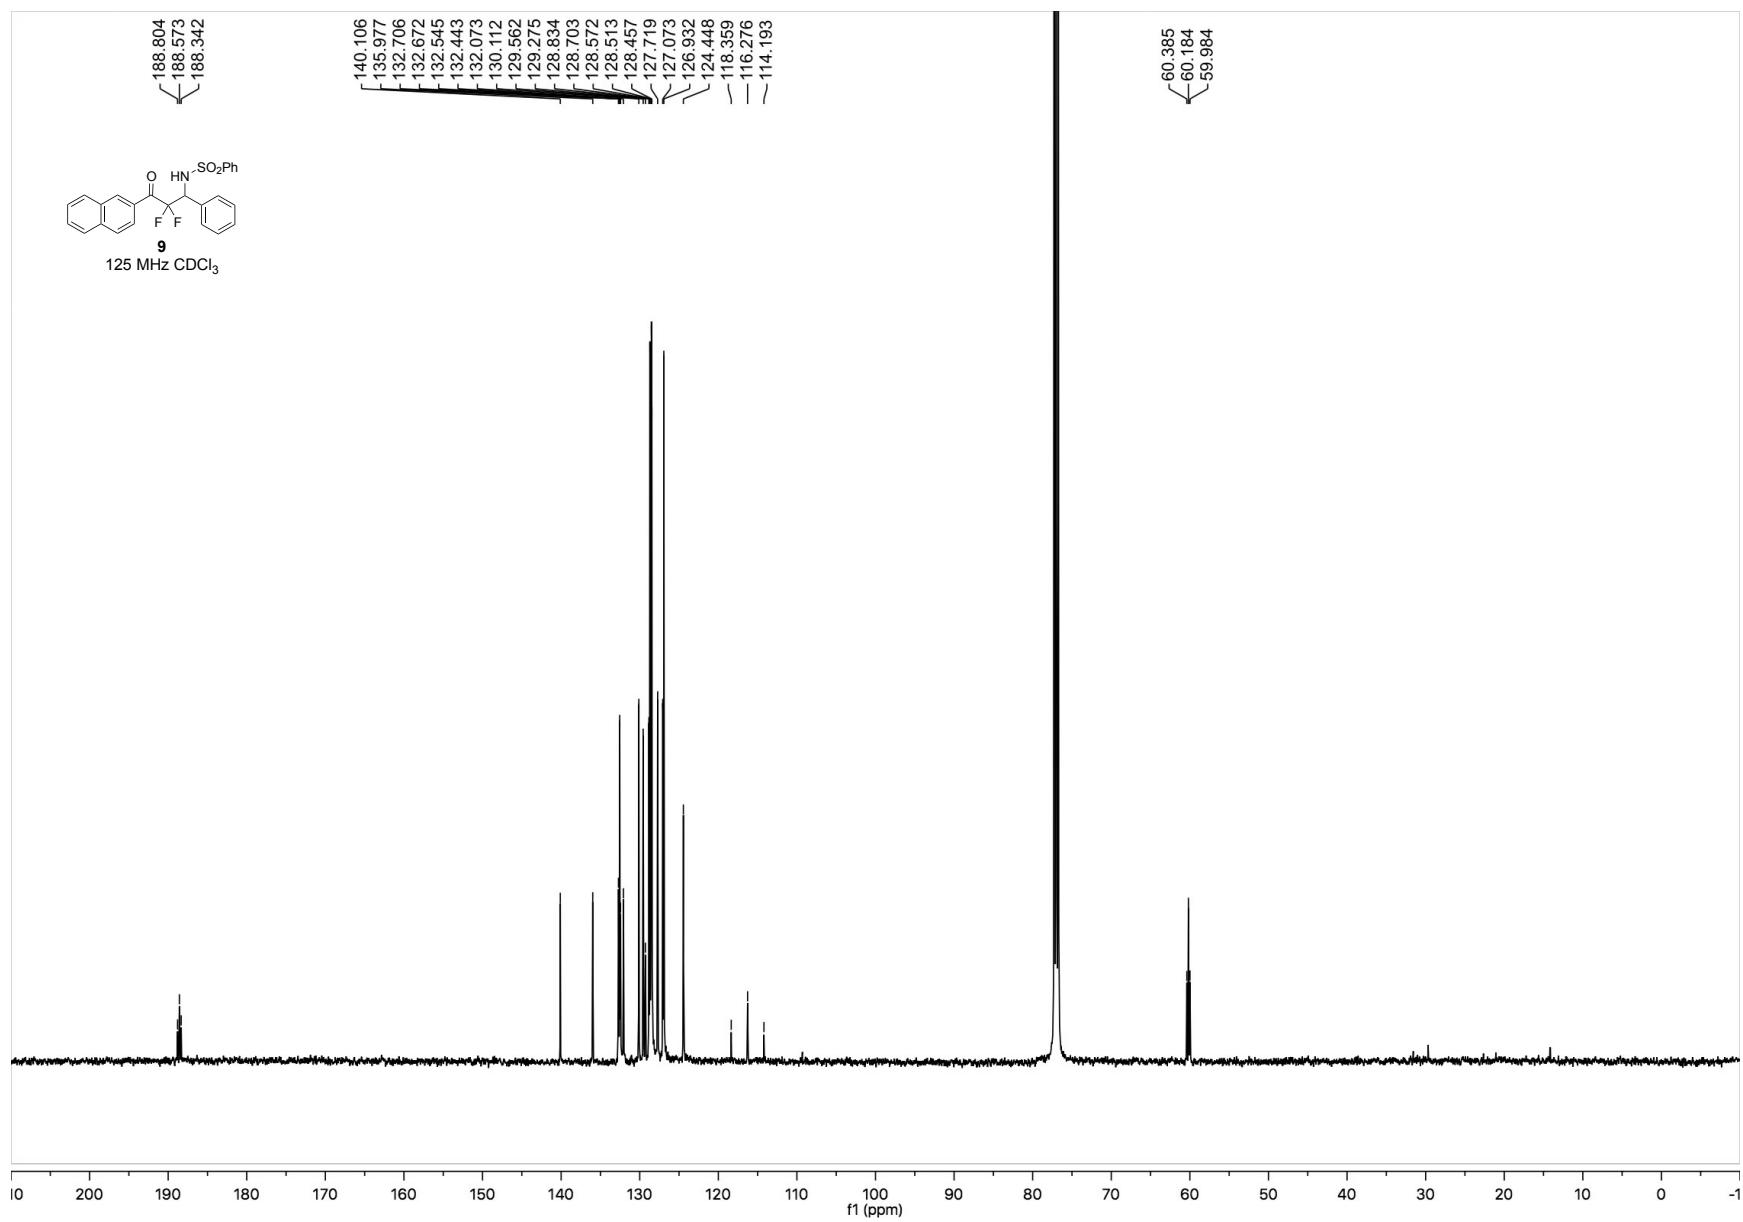

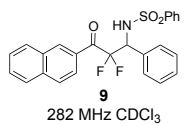

103.2545  
103.2970  
104.2462  
104.2887  
104.9577  
105.0031  
105.9495  
105.9950

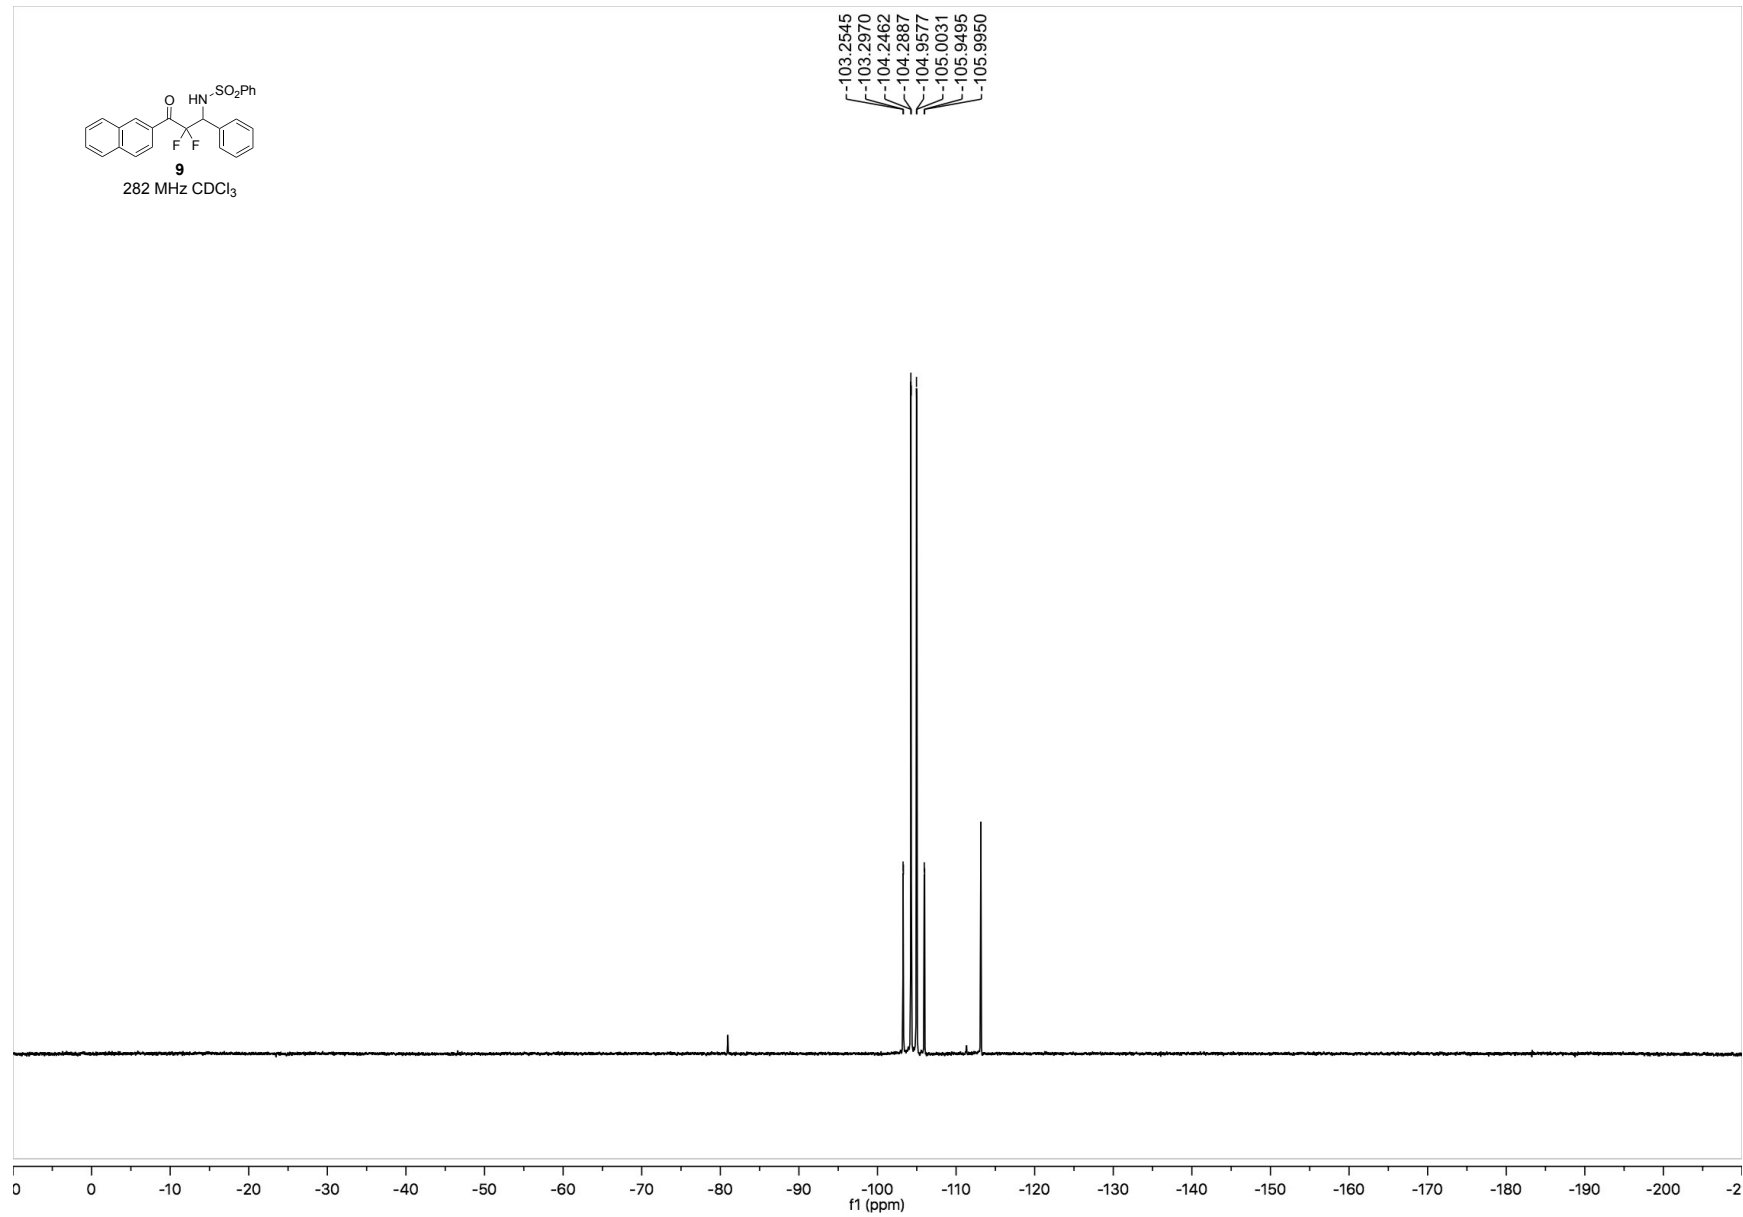

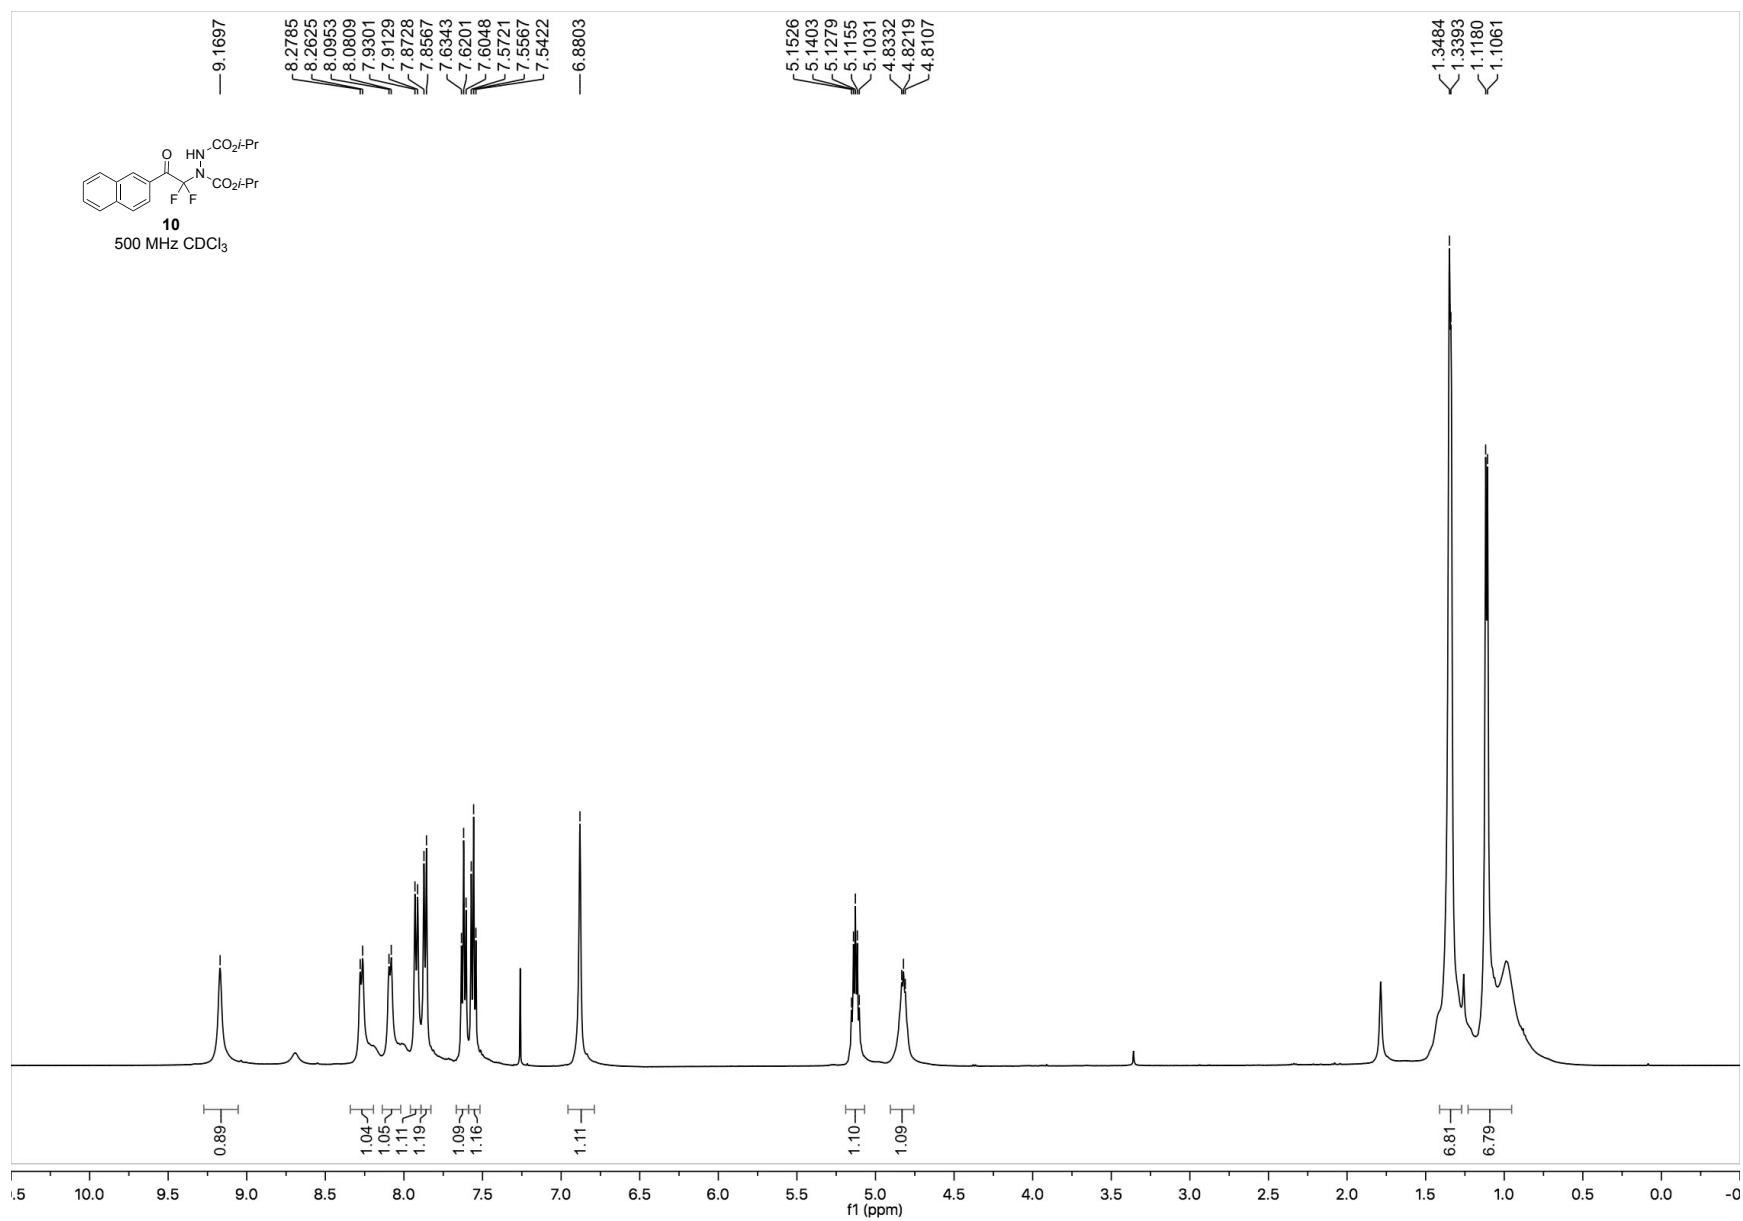

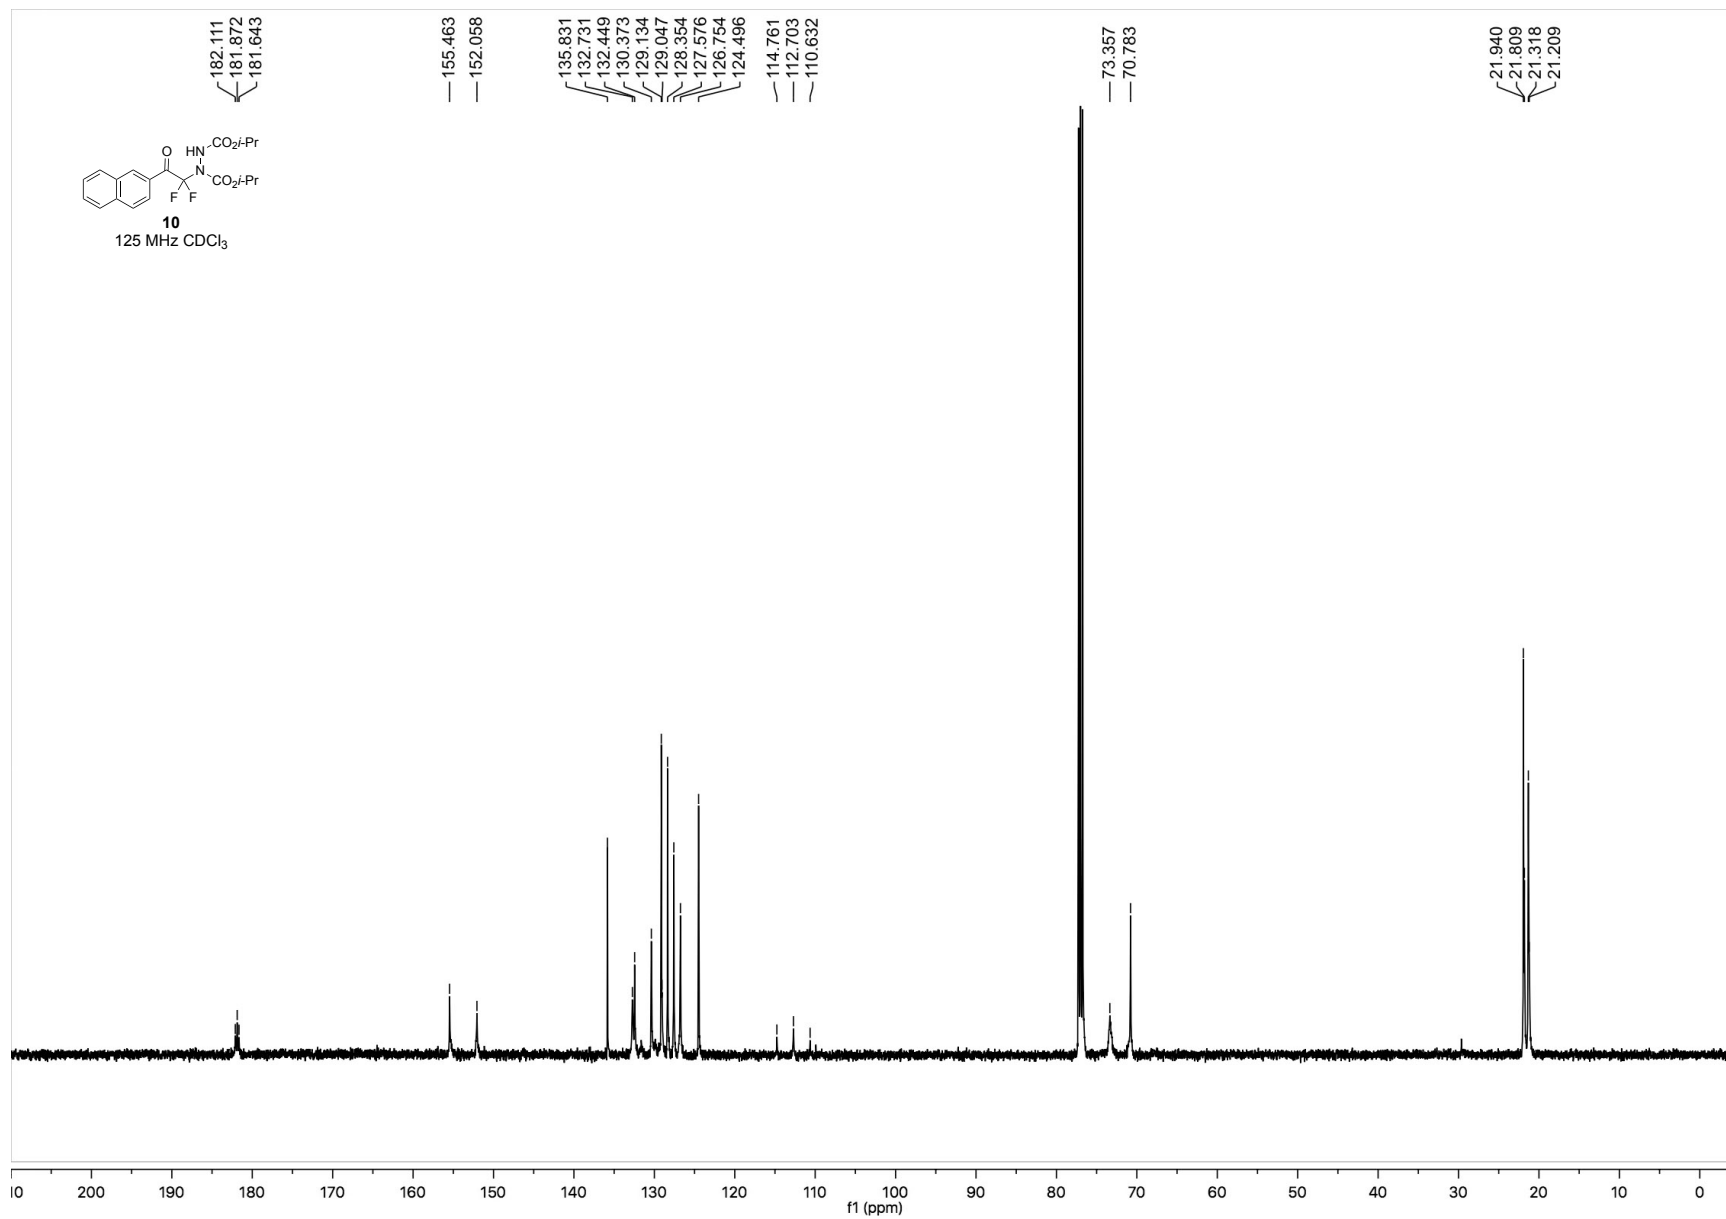

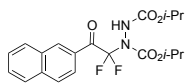

**10**  
470 MHz CDCl<sub>3</sub>

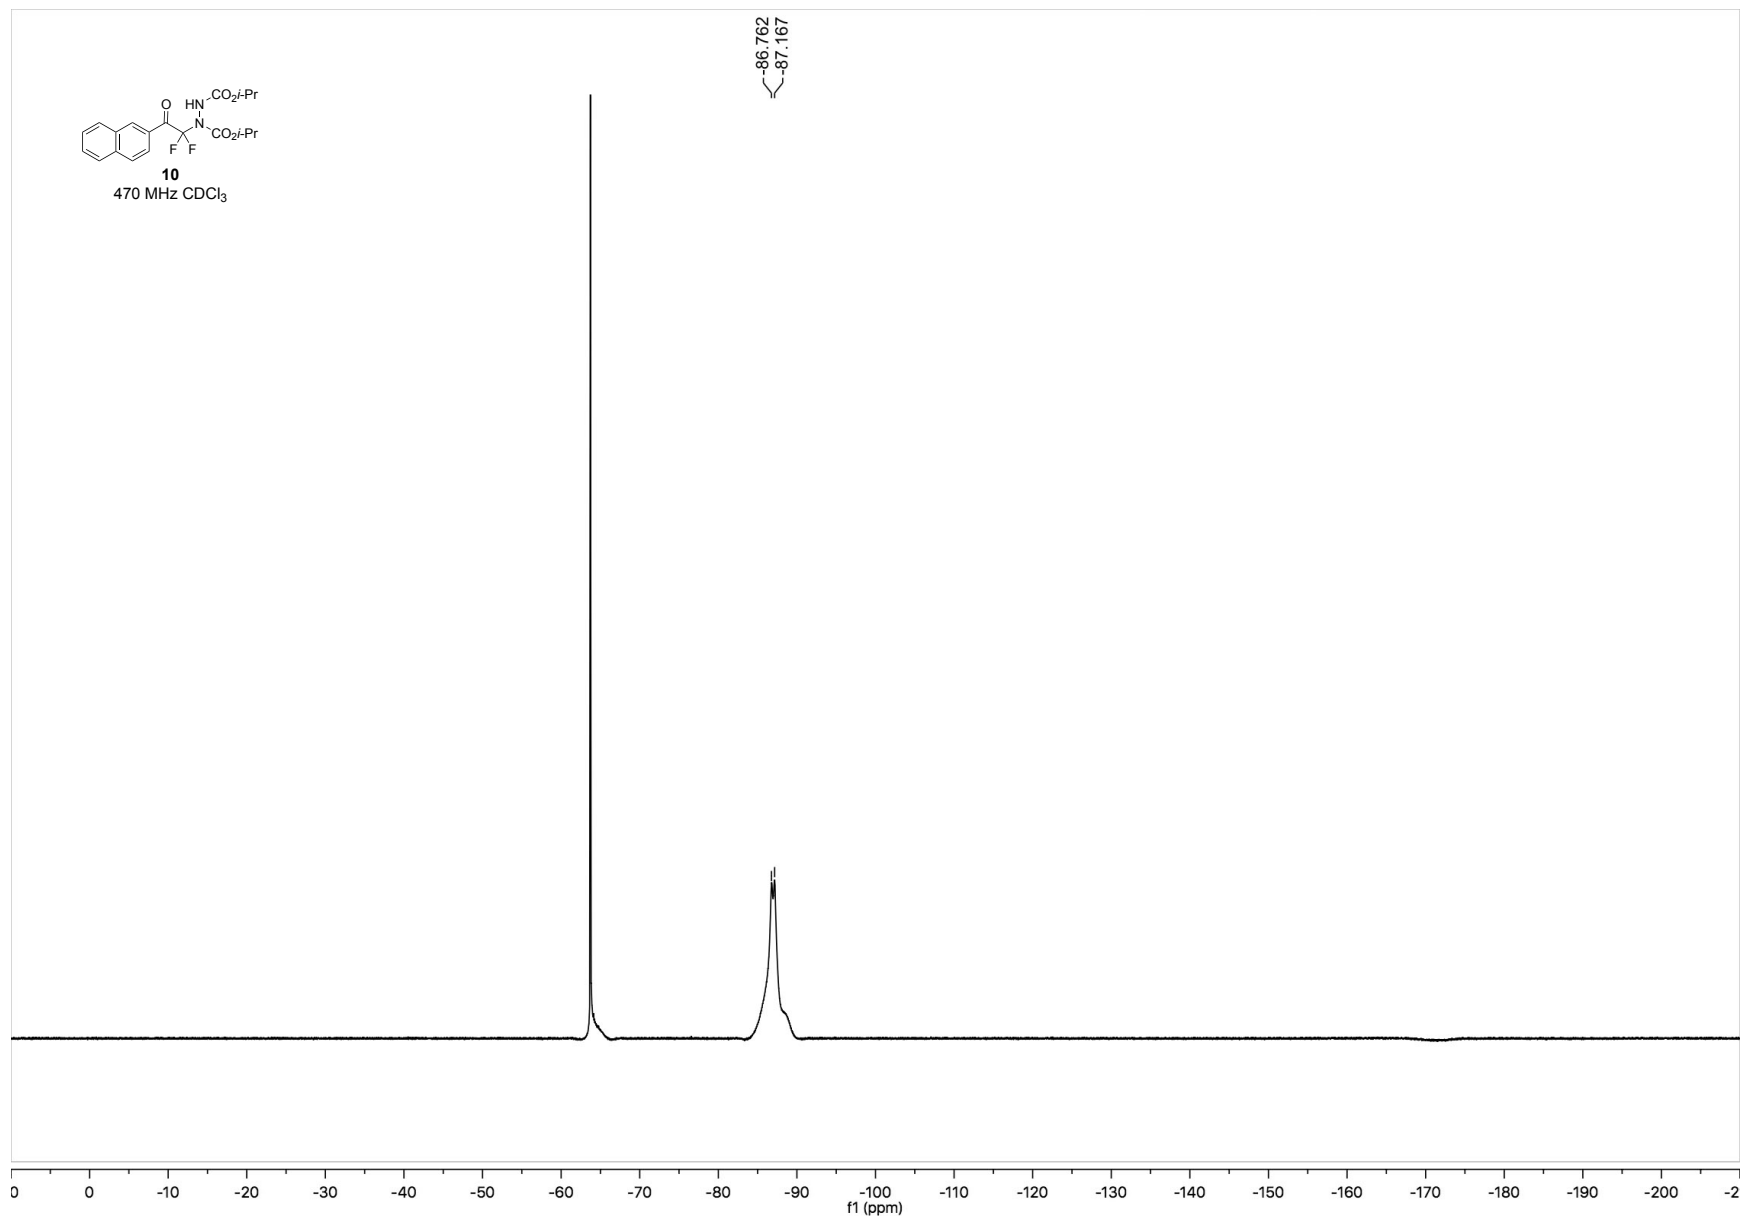



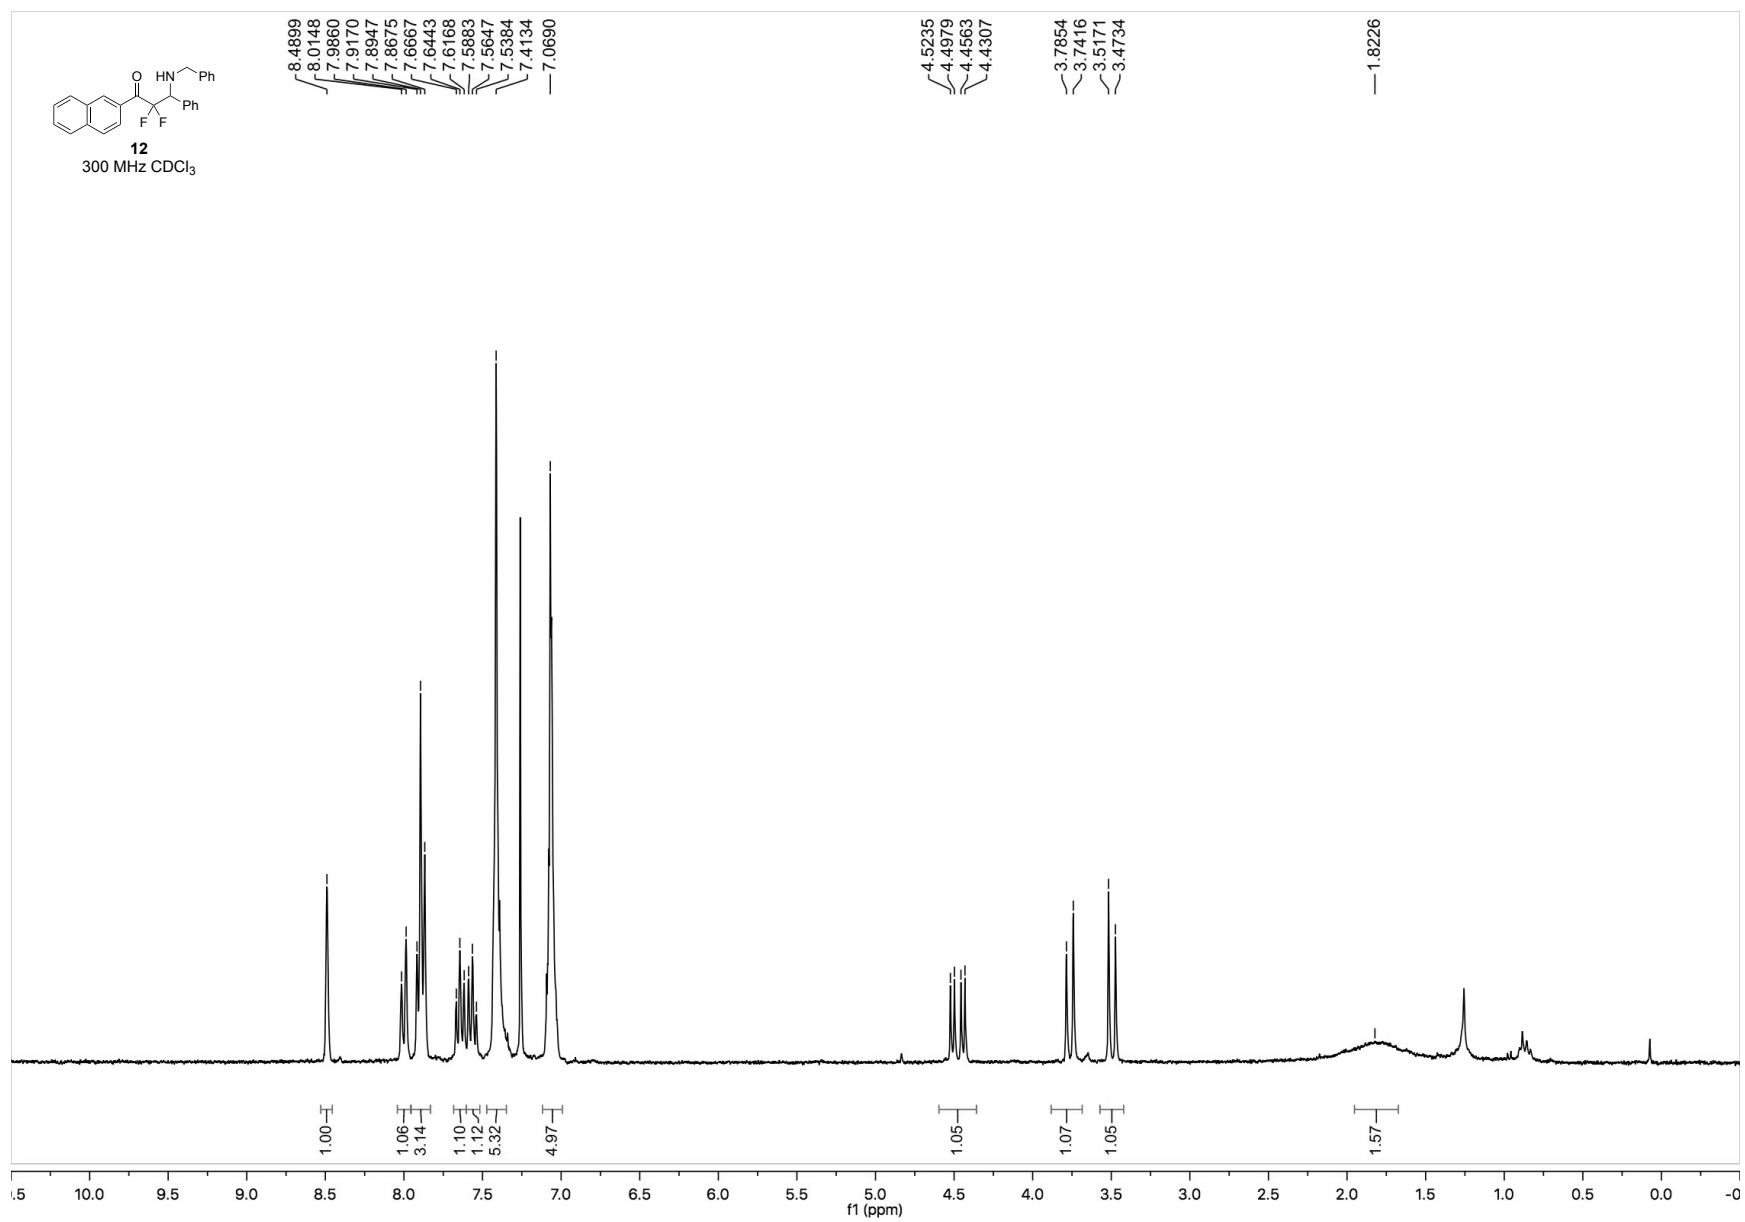

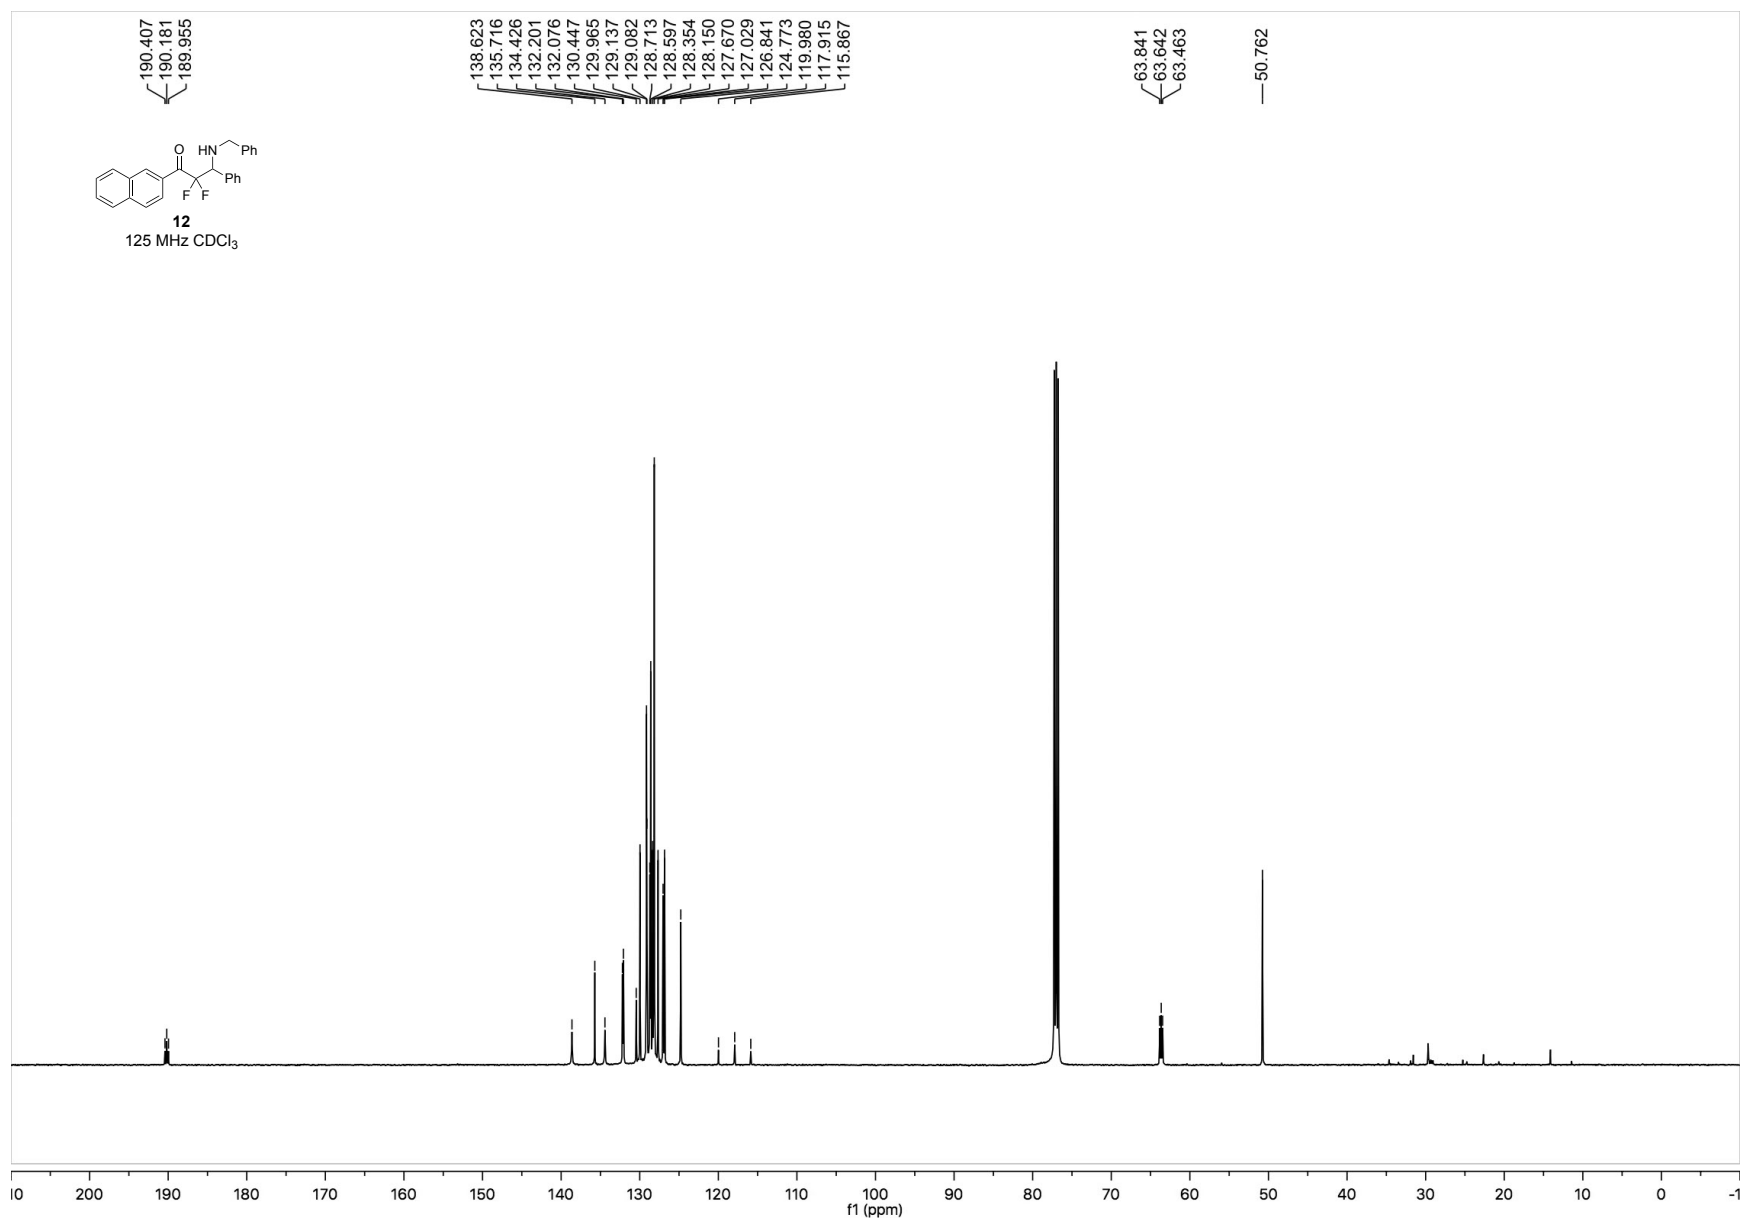

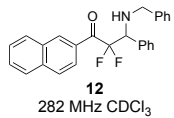

-102.189  
-102.214  
-103.139  
-103.165  
-114.878  
-114.949  
-115.828  
-115.899

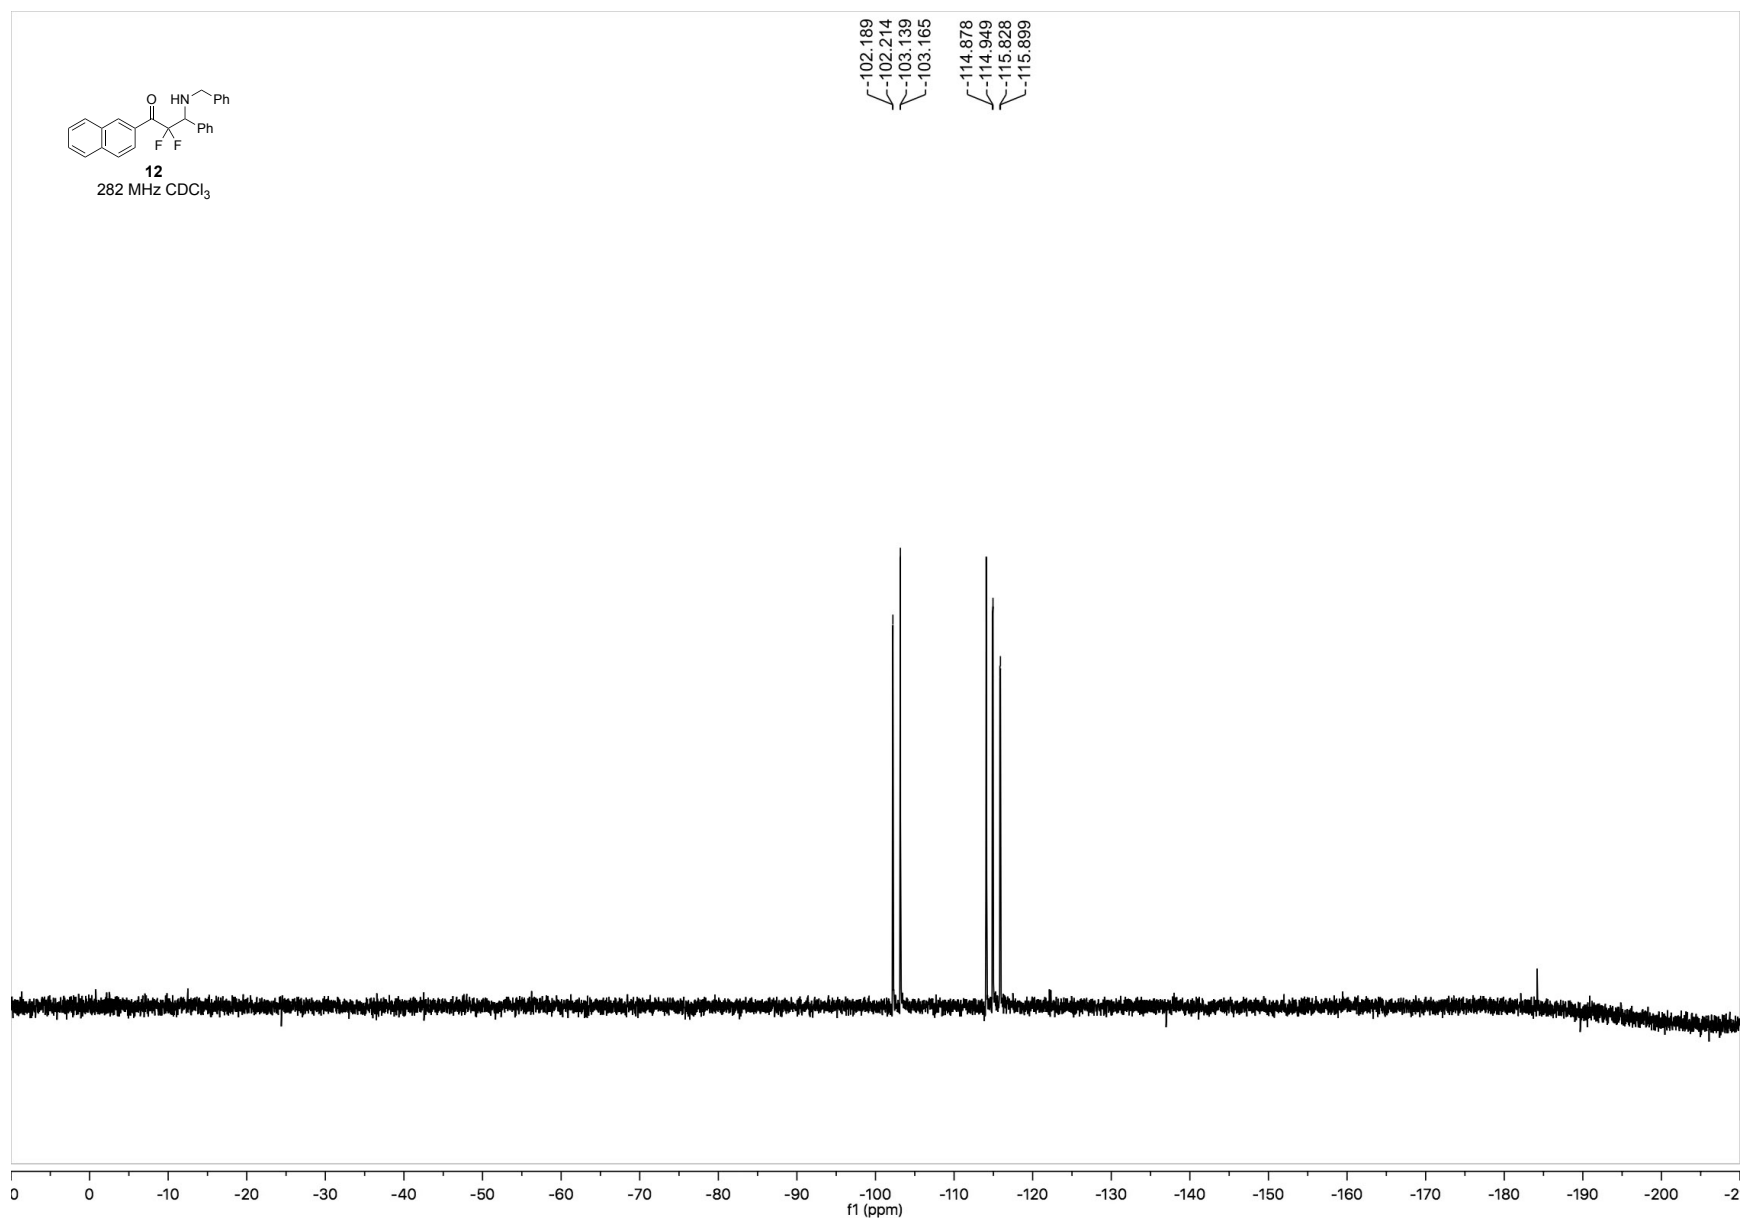

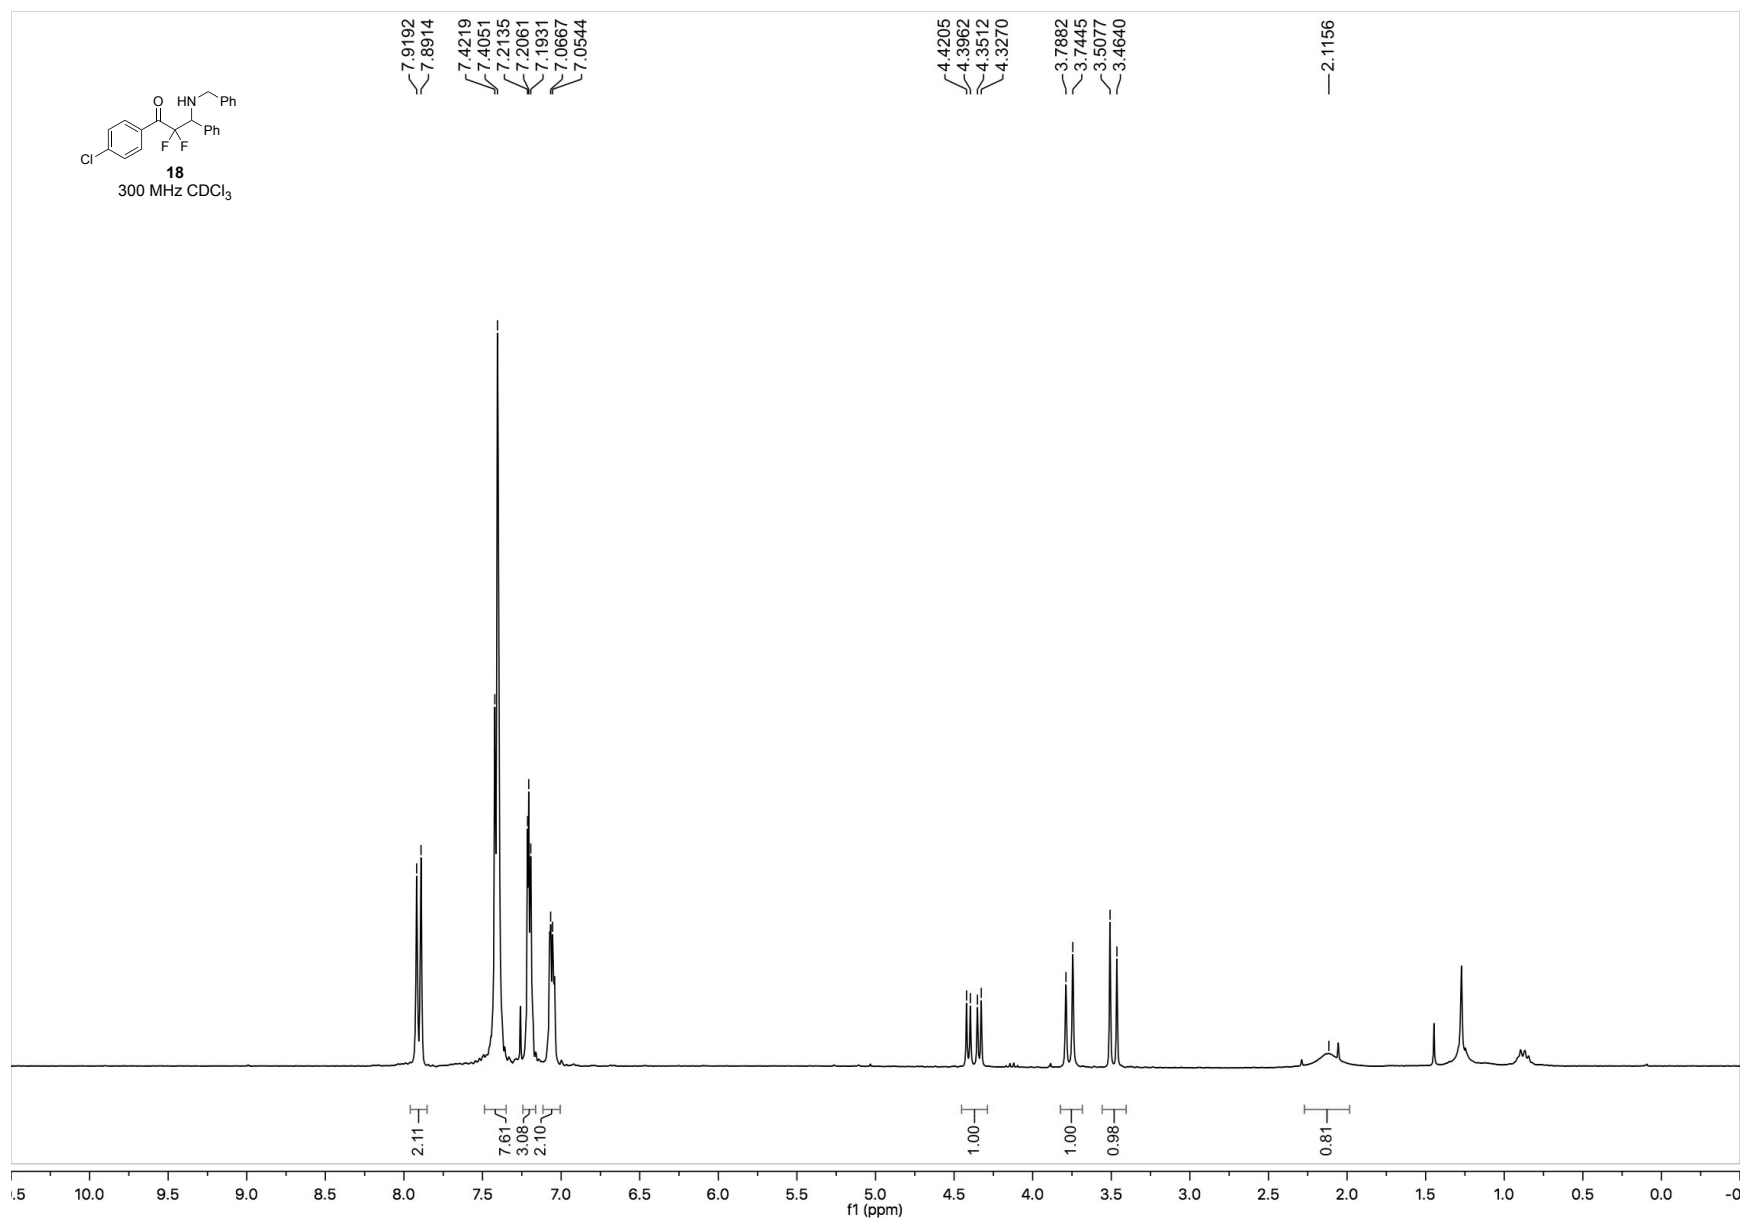

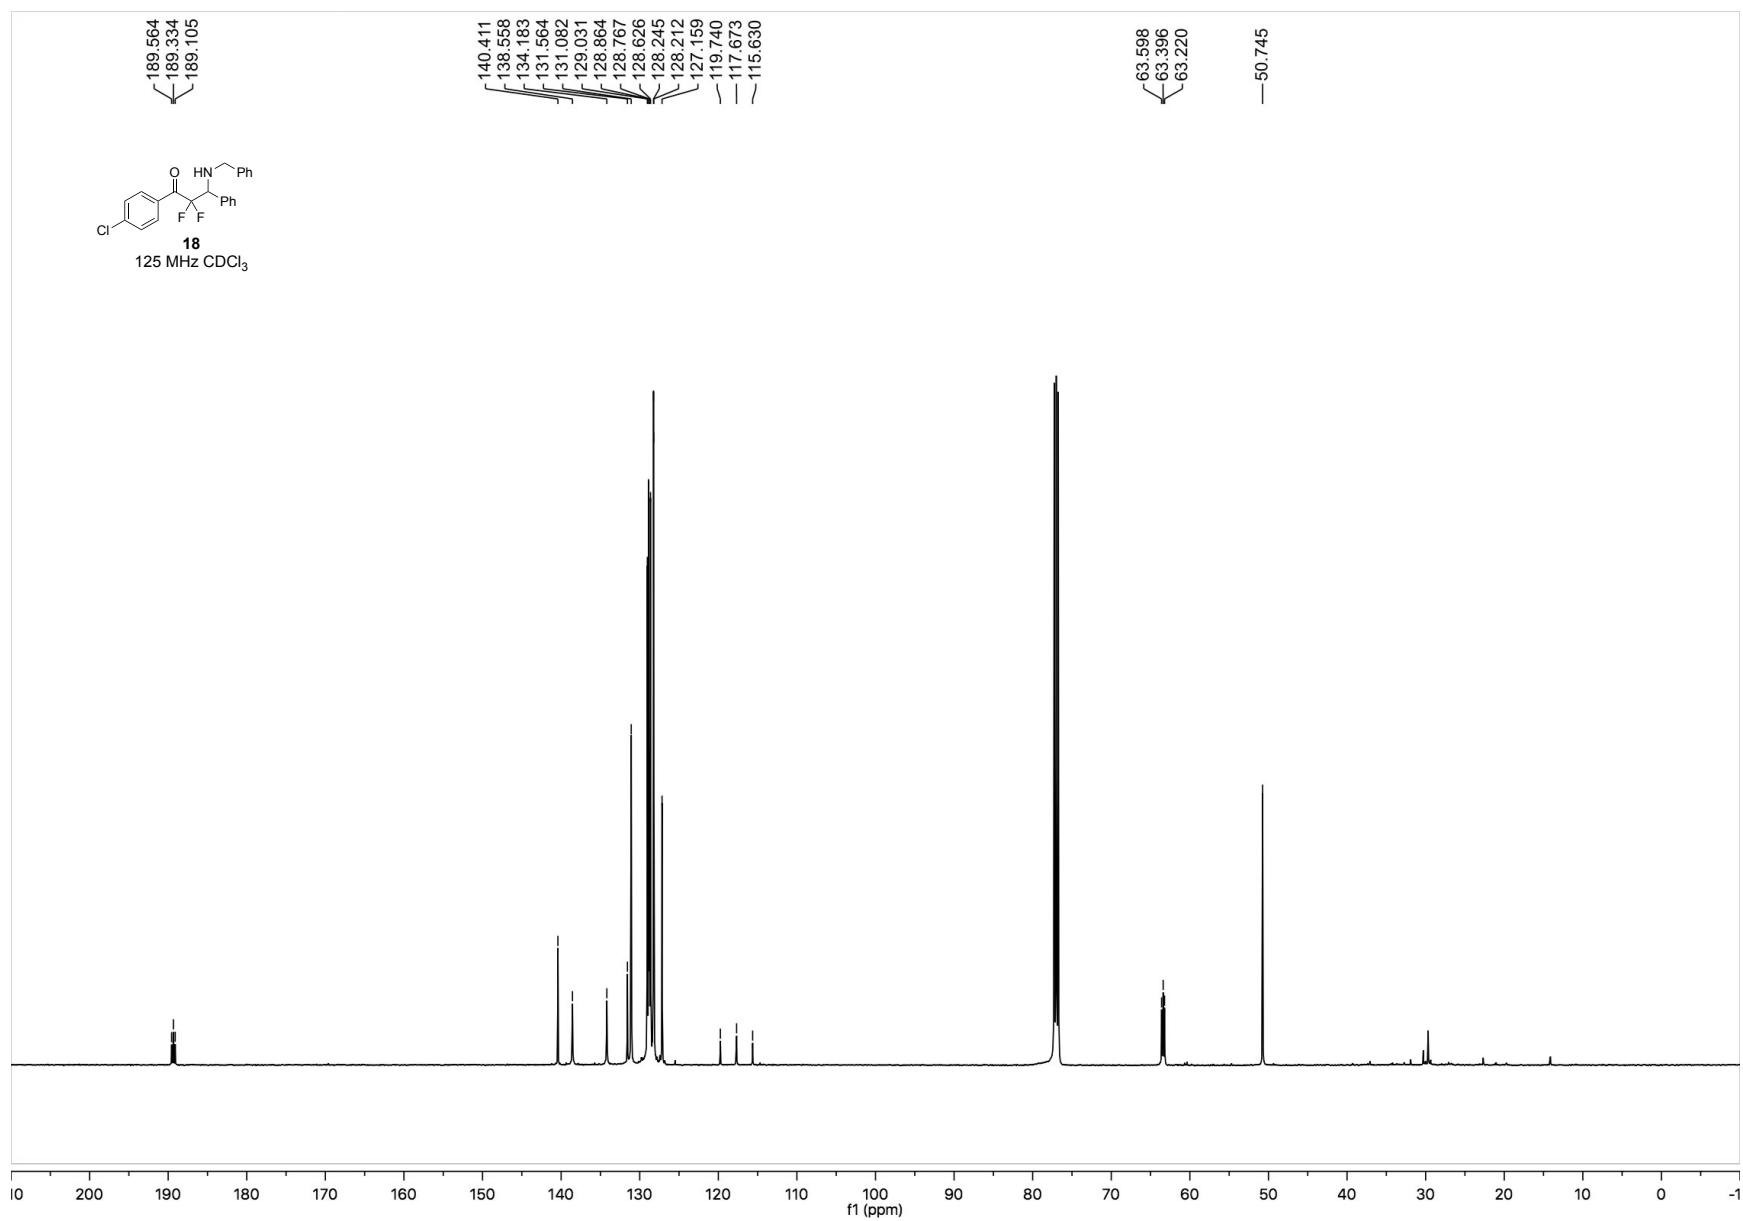

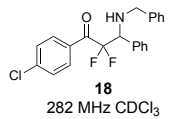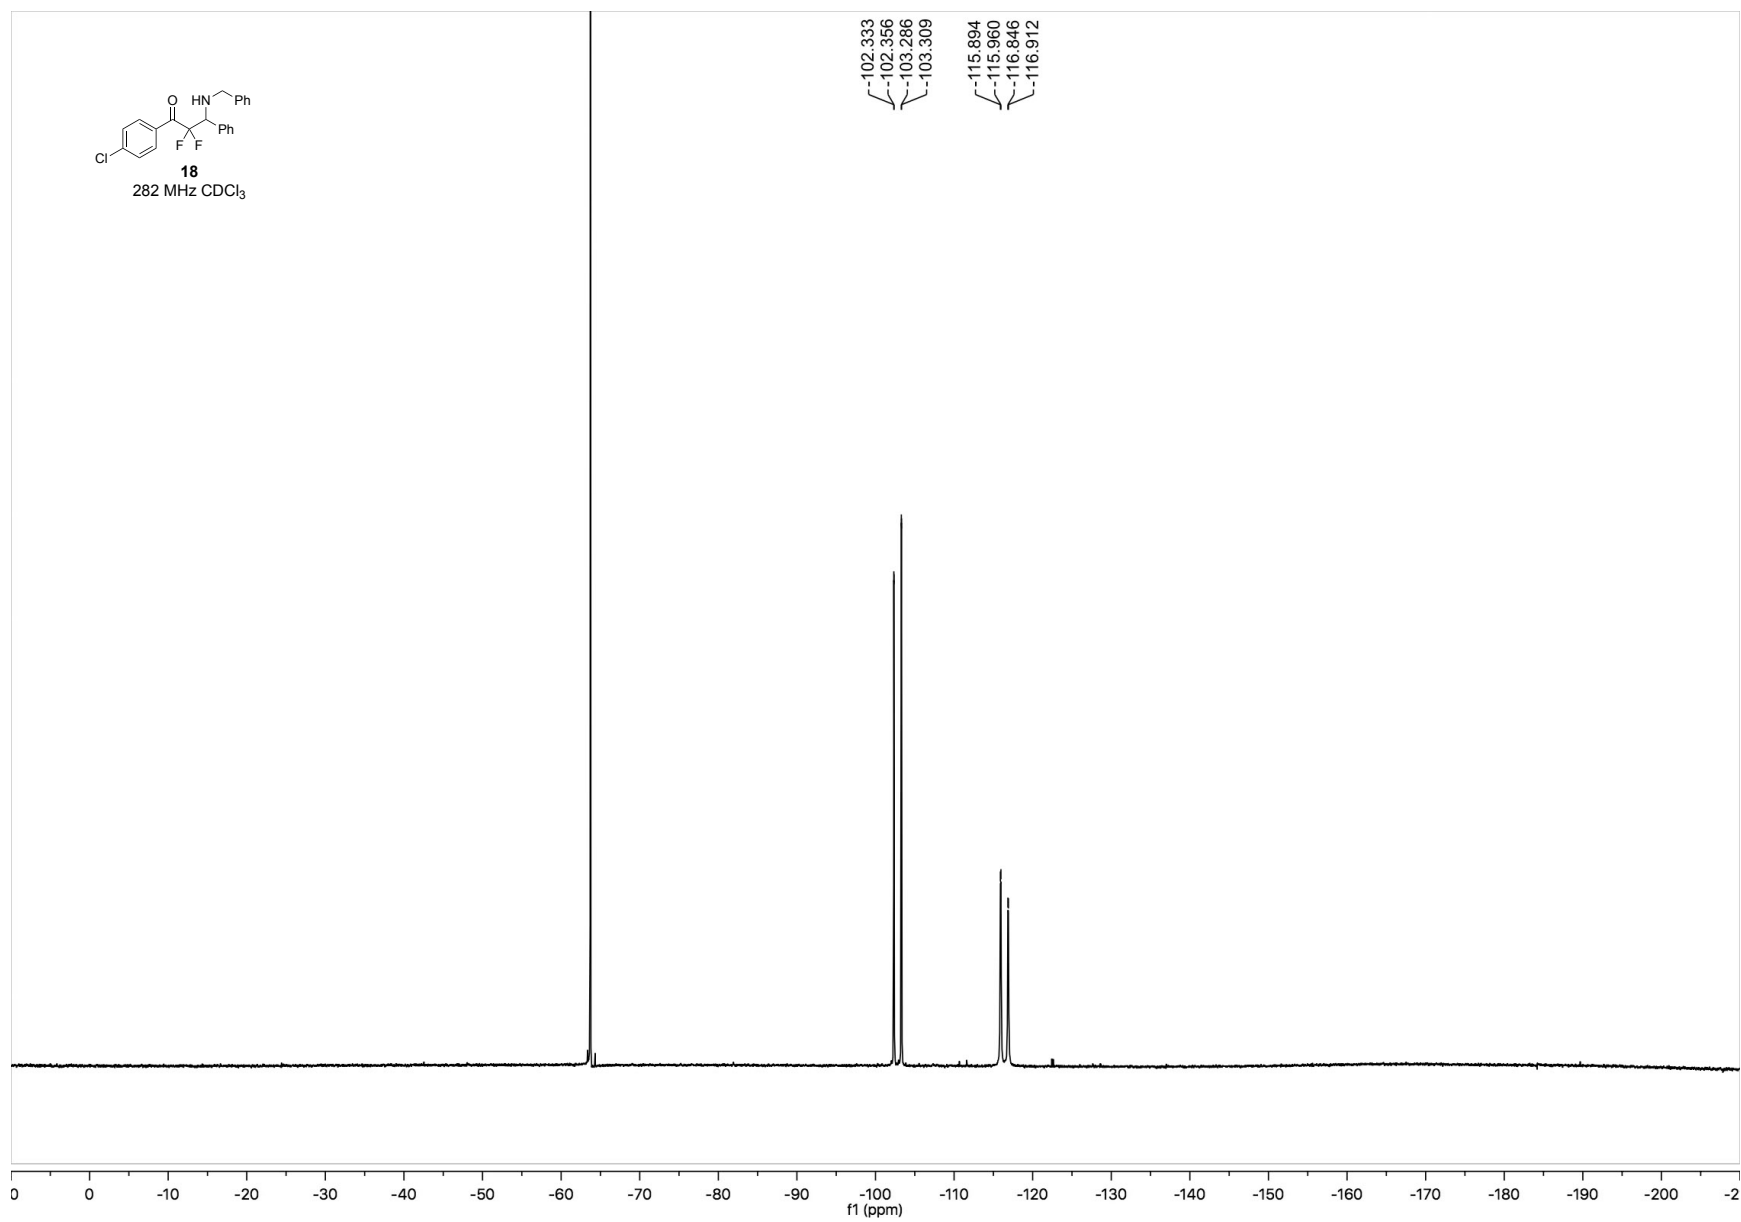

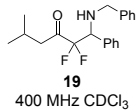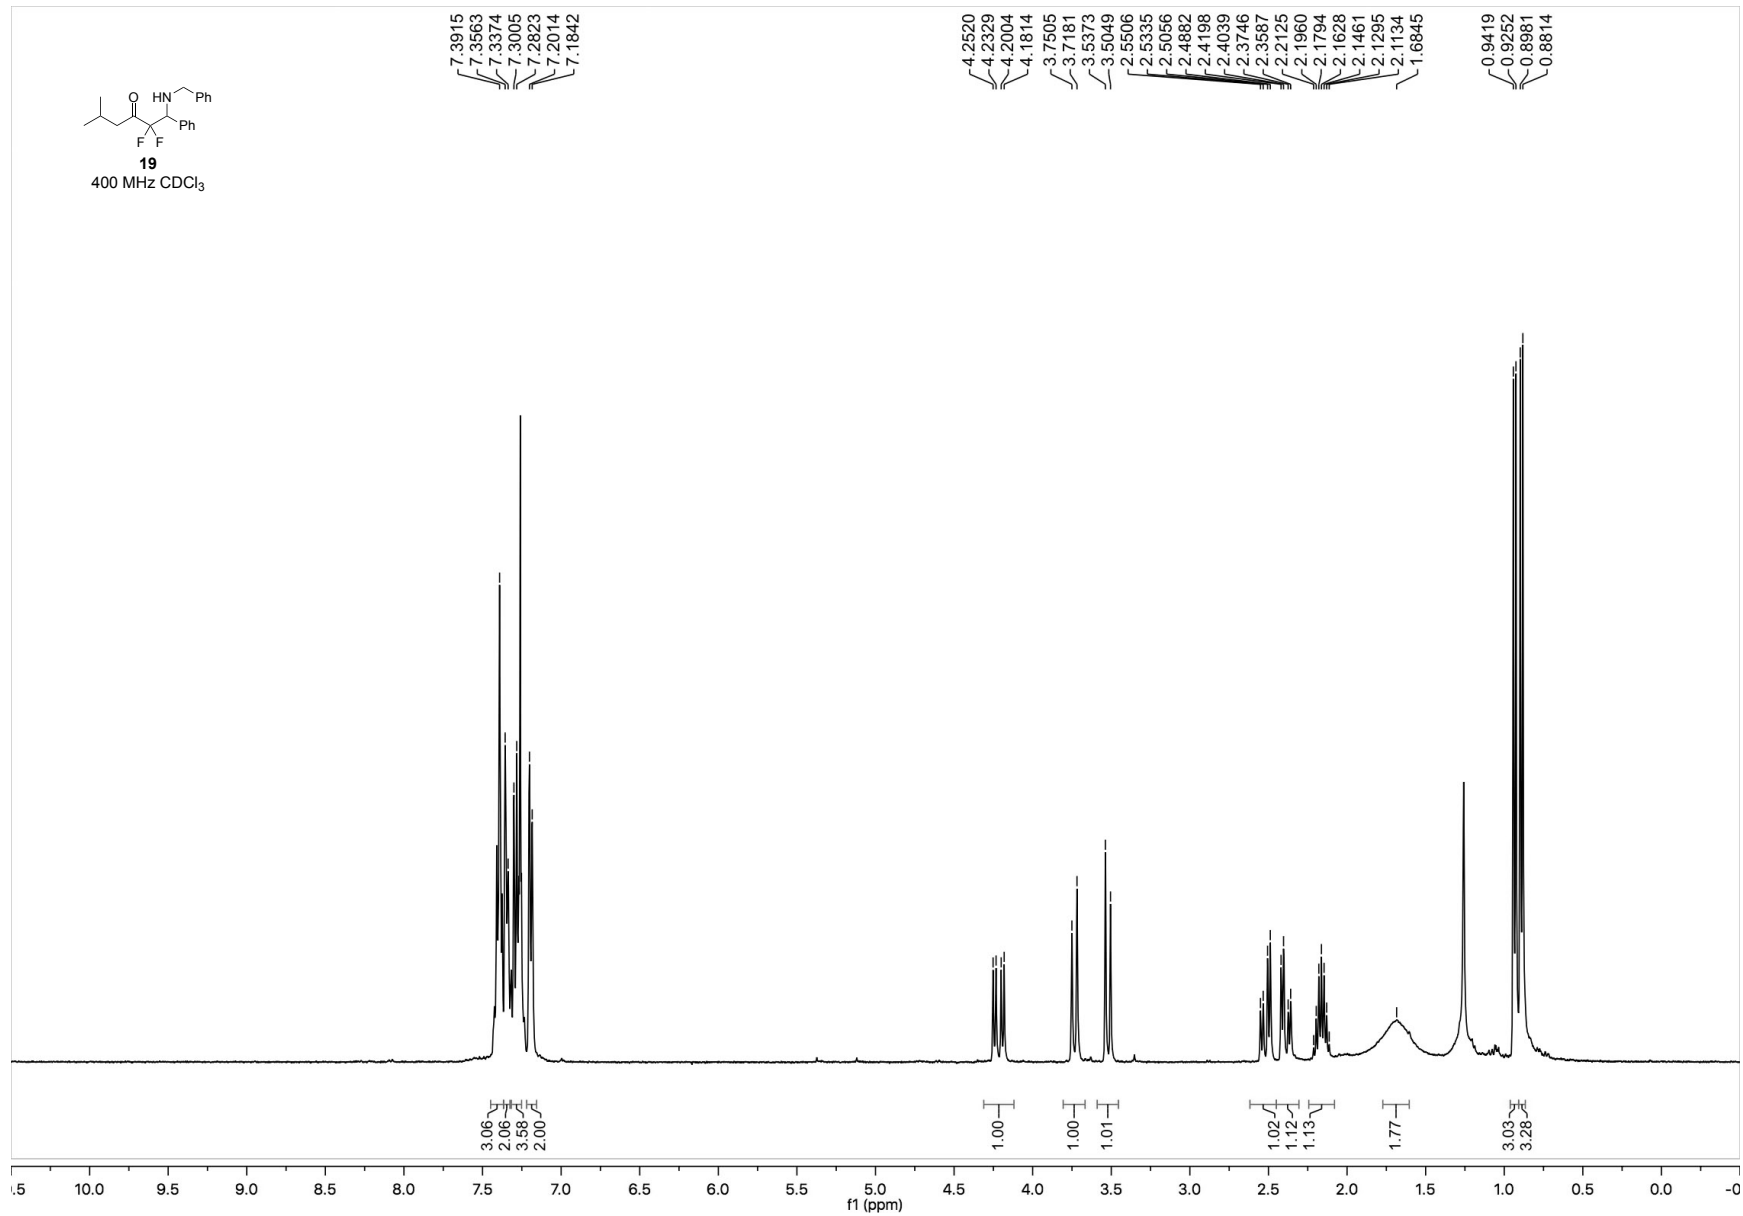

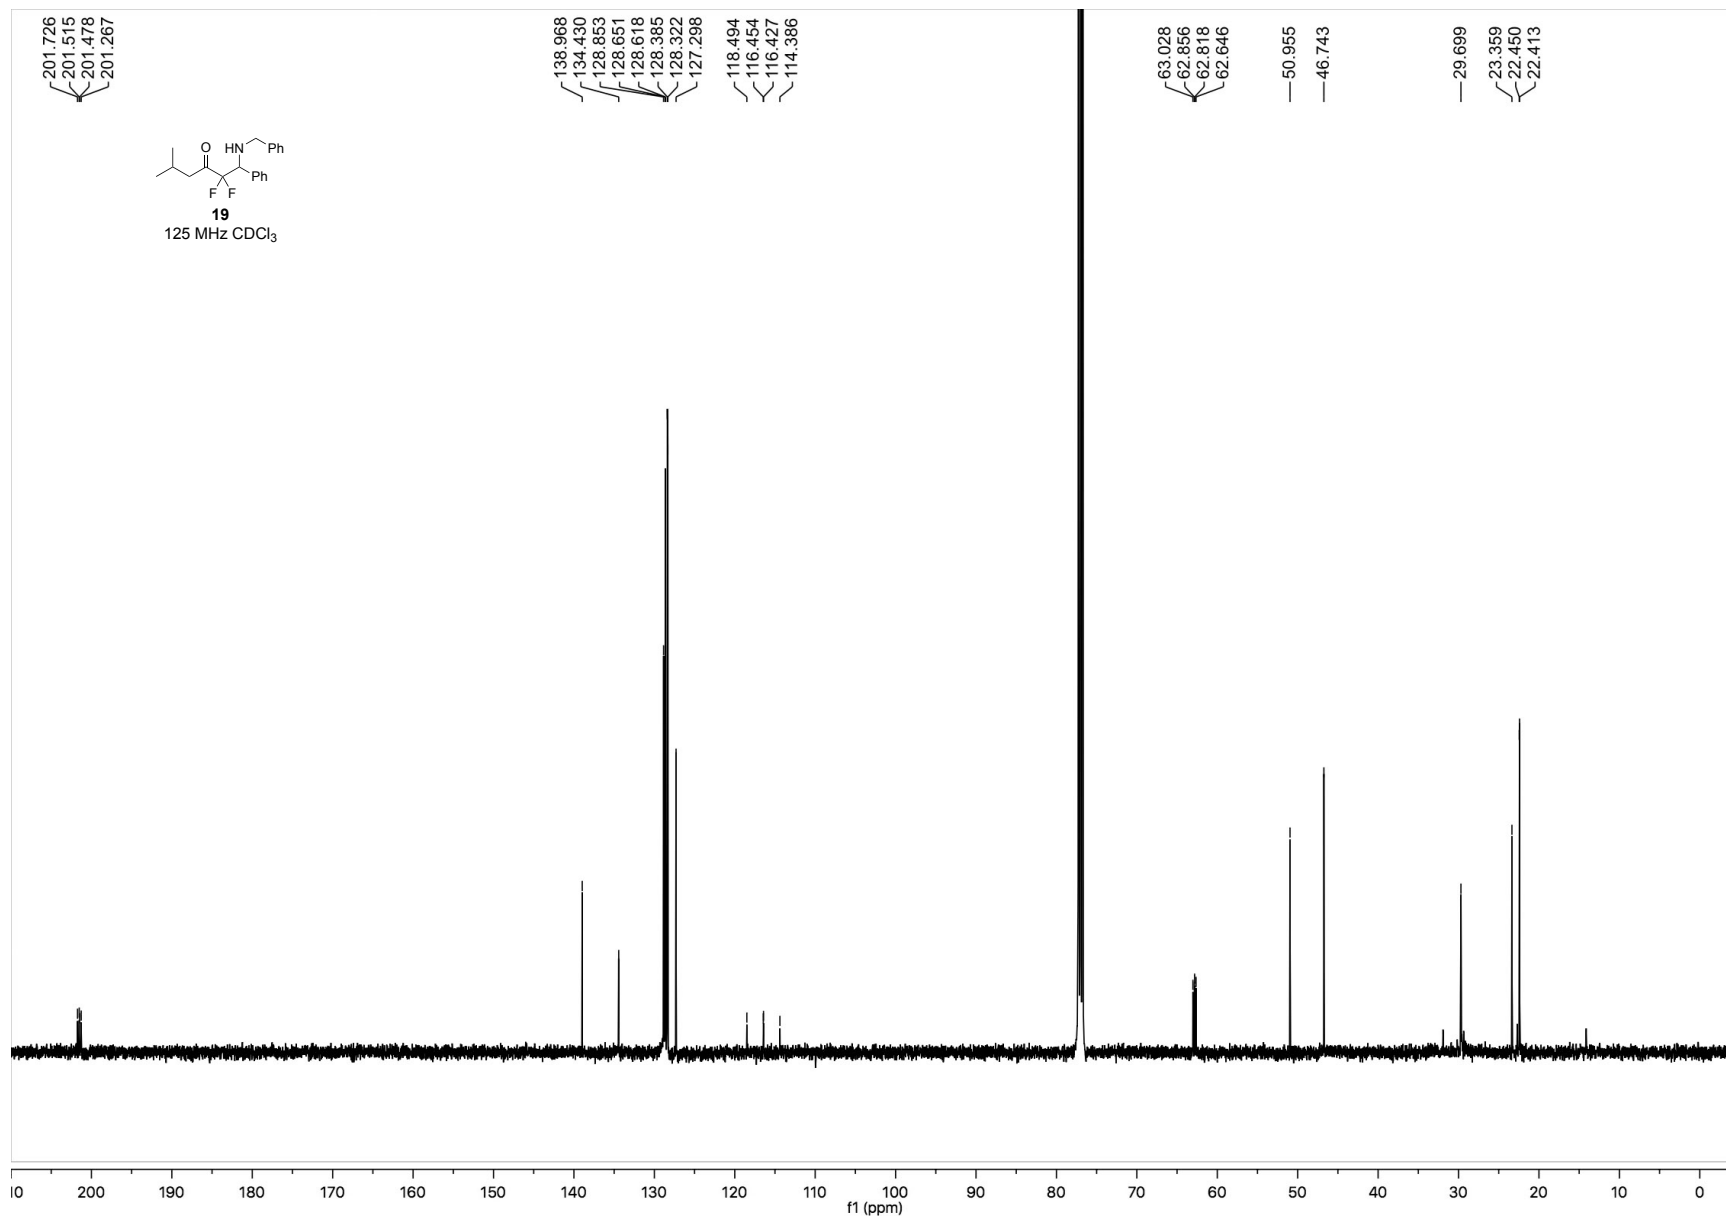



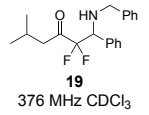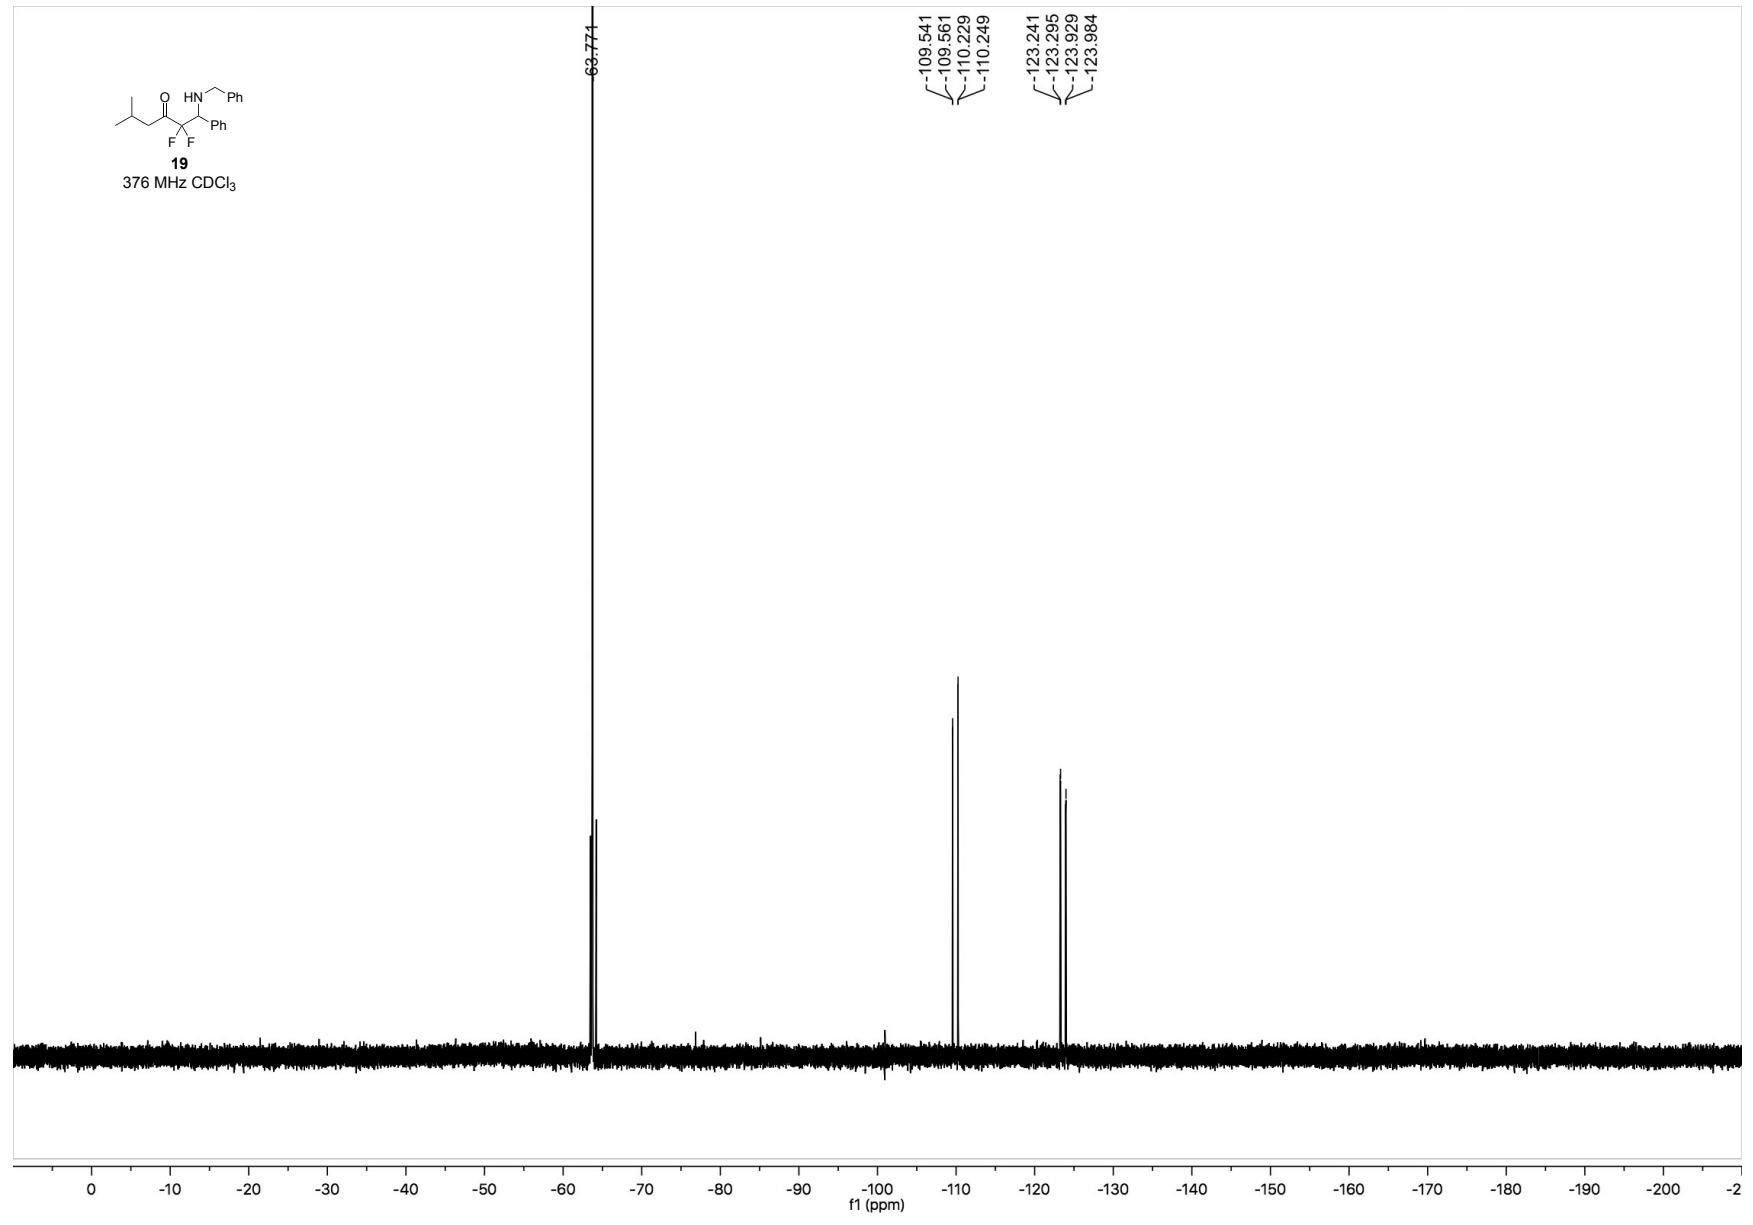

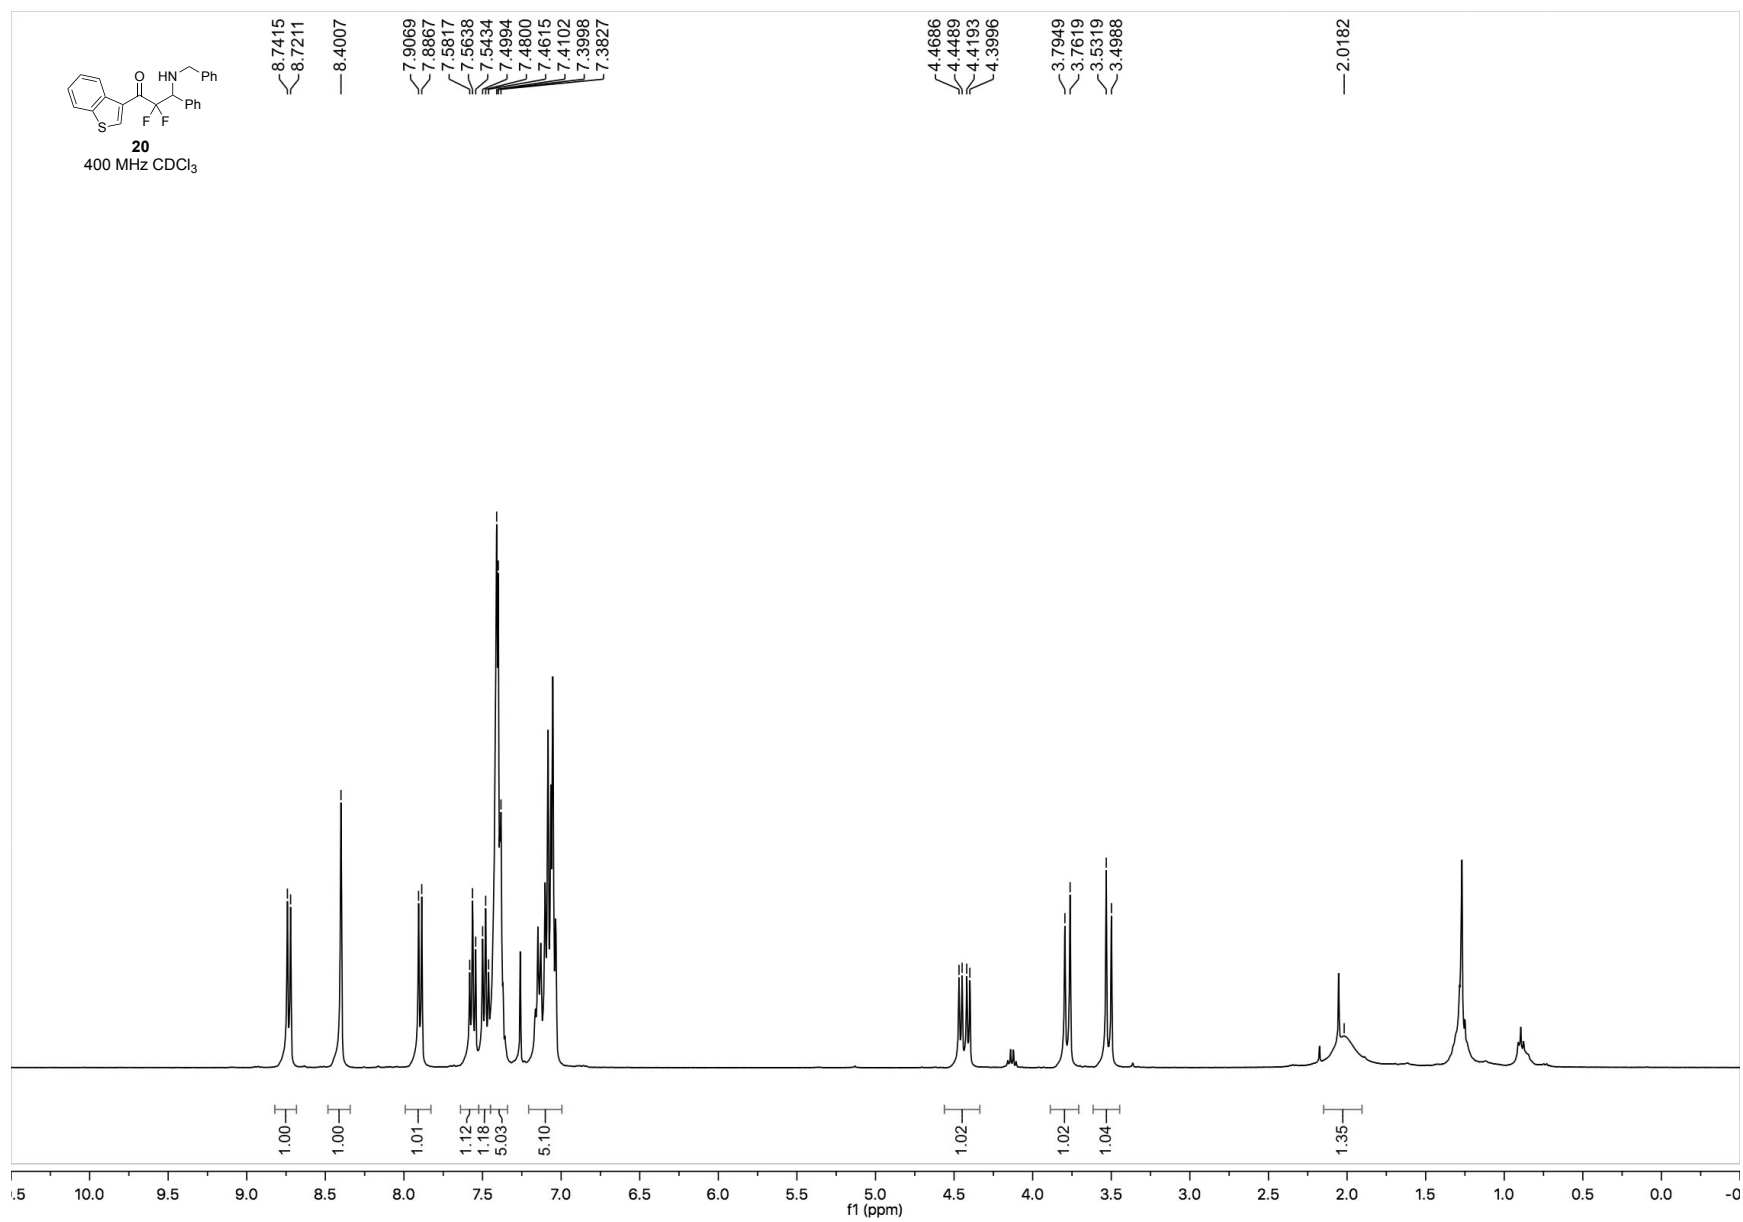

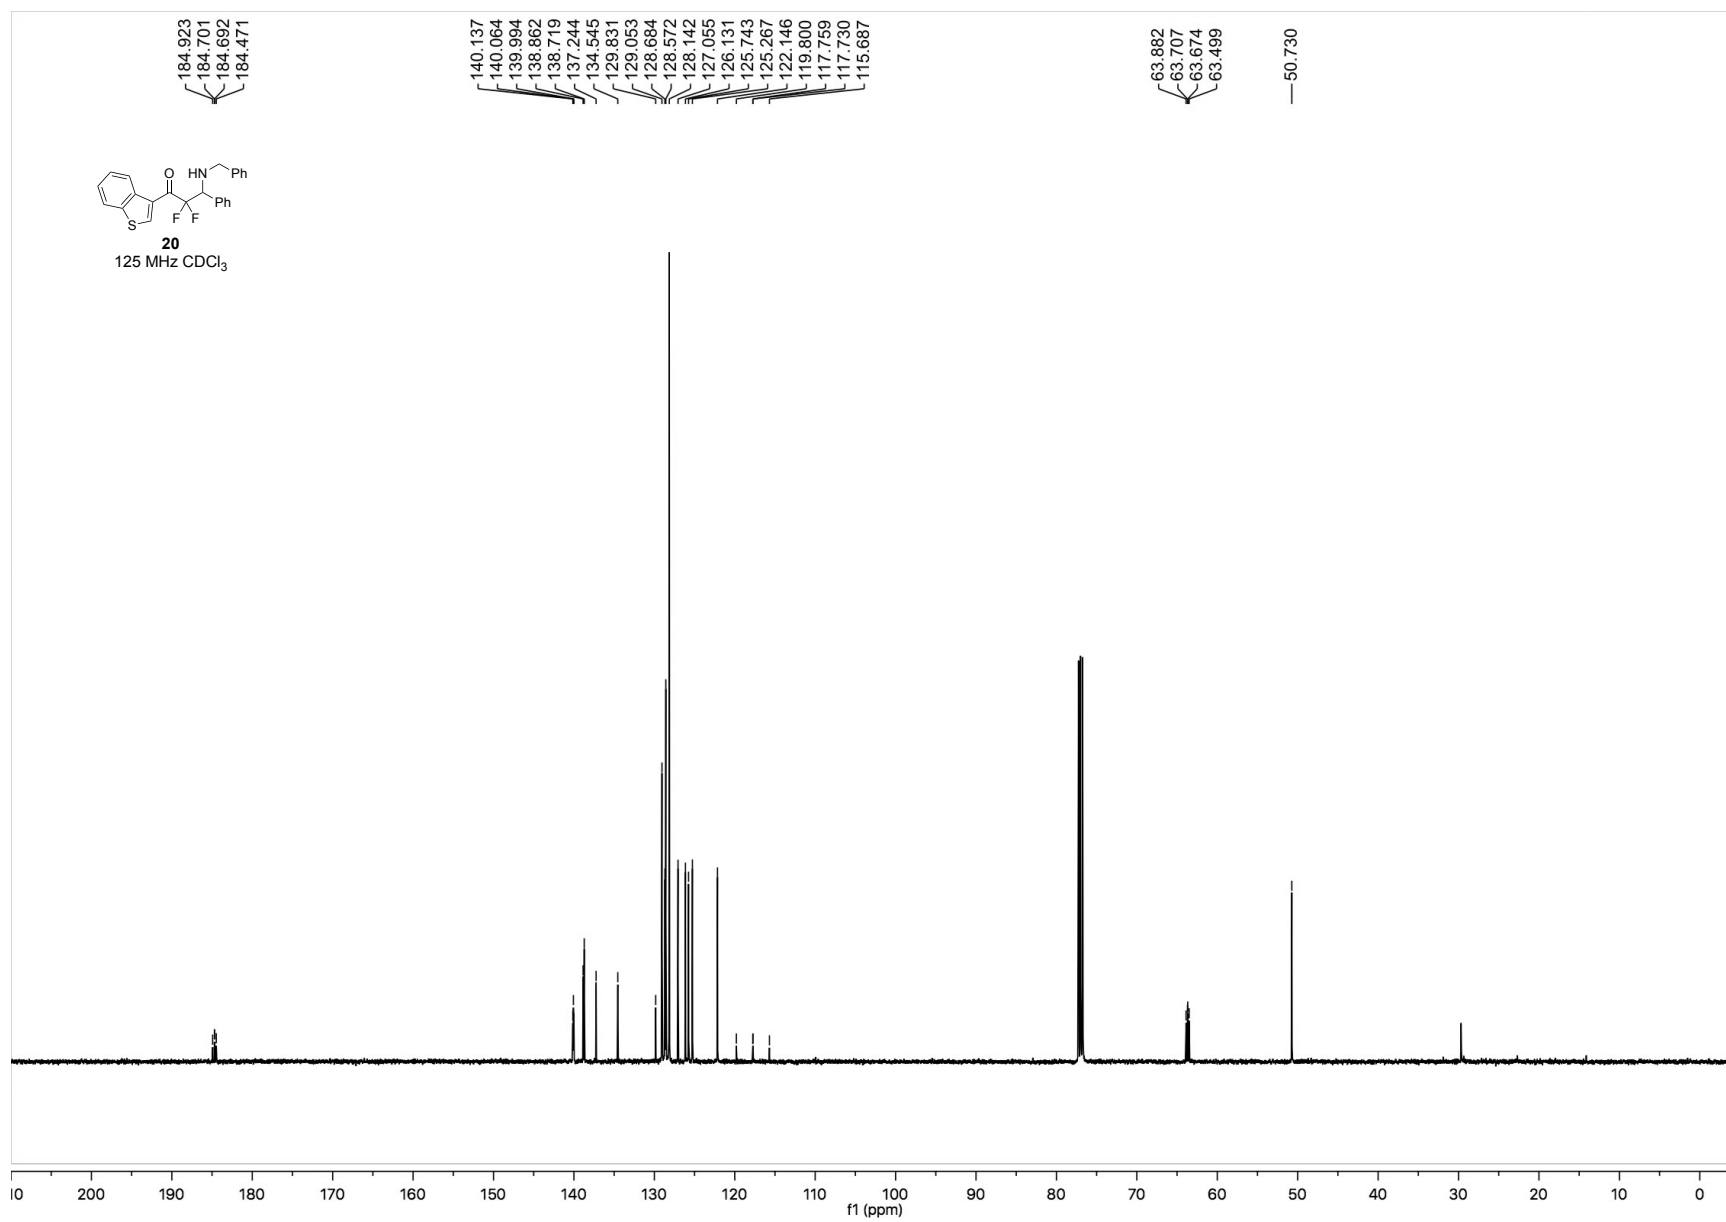

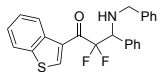

**20**  
376 MHz CDCl<sub>3</sub>

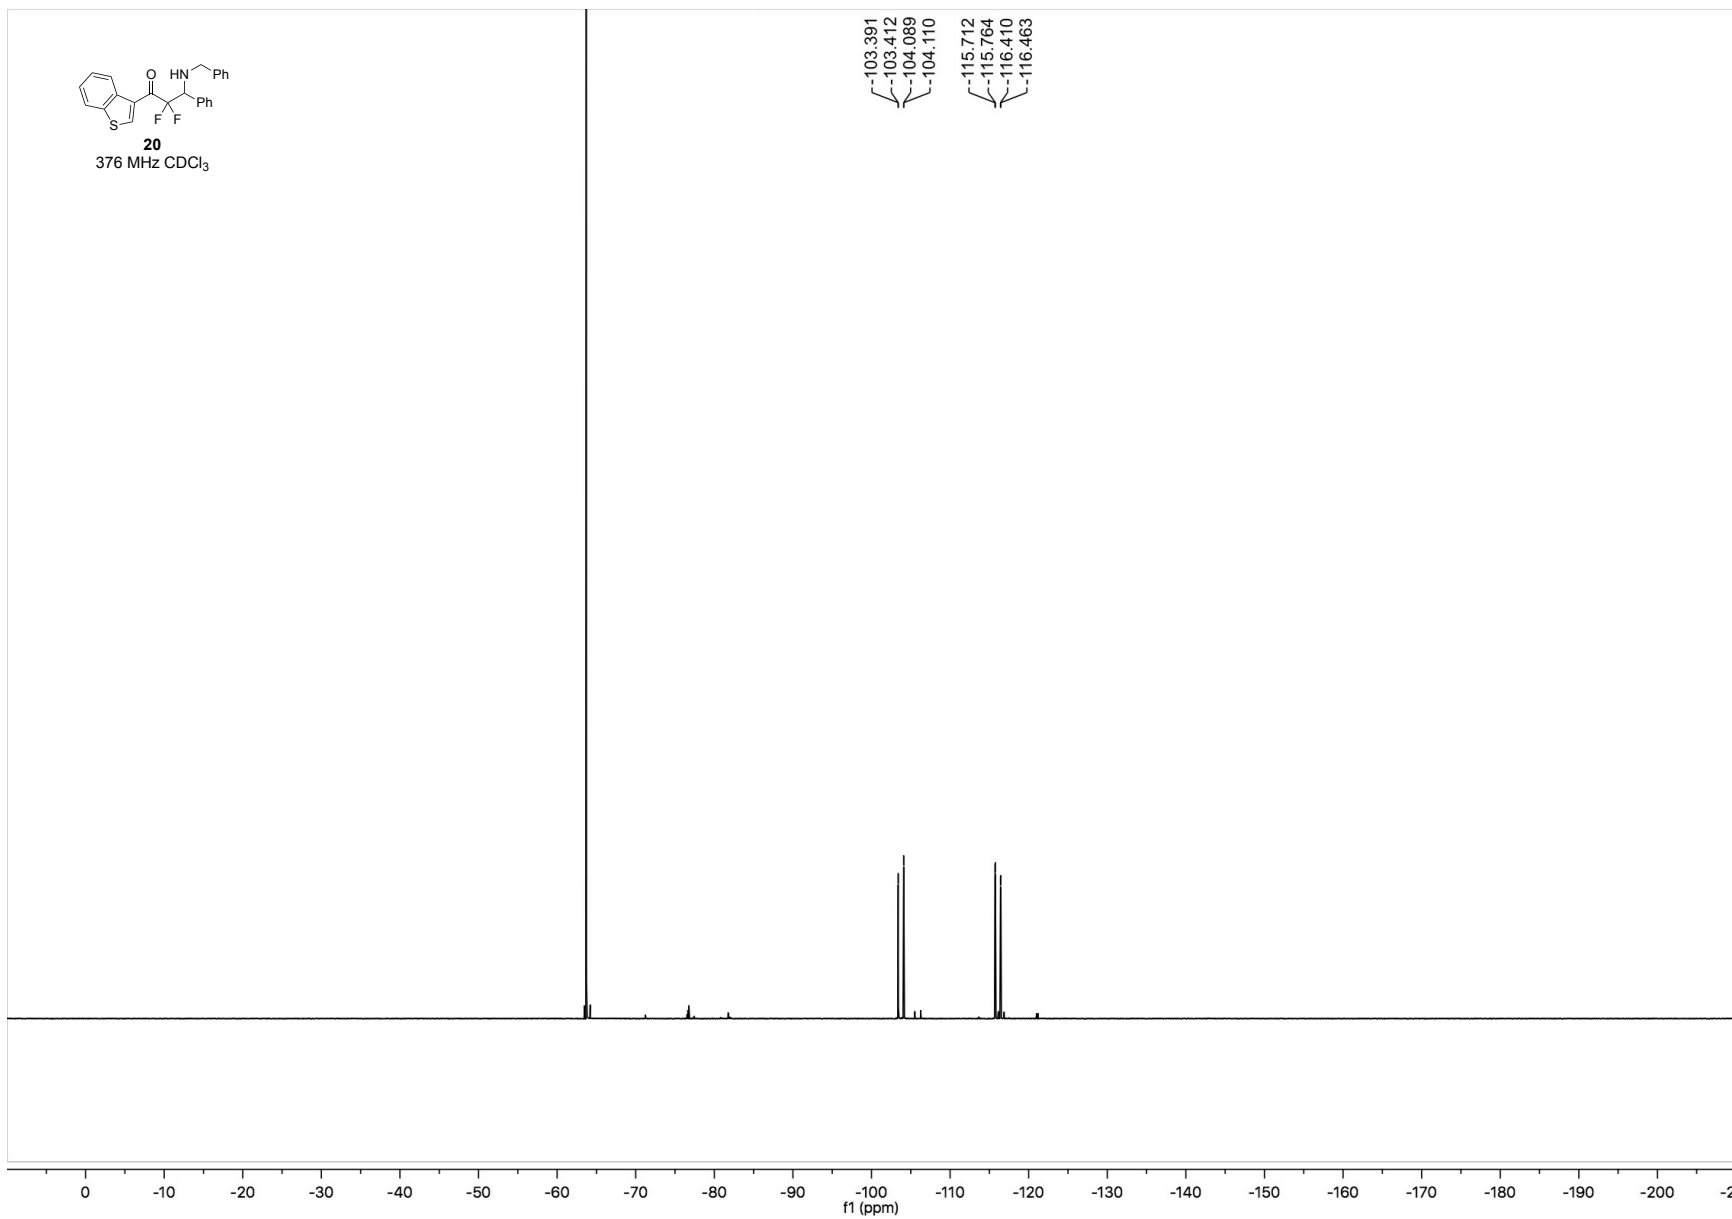

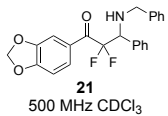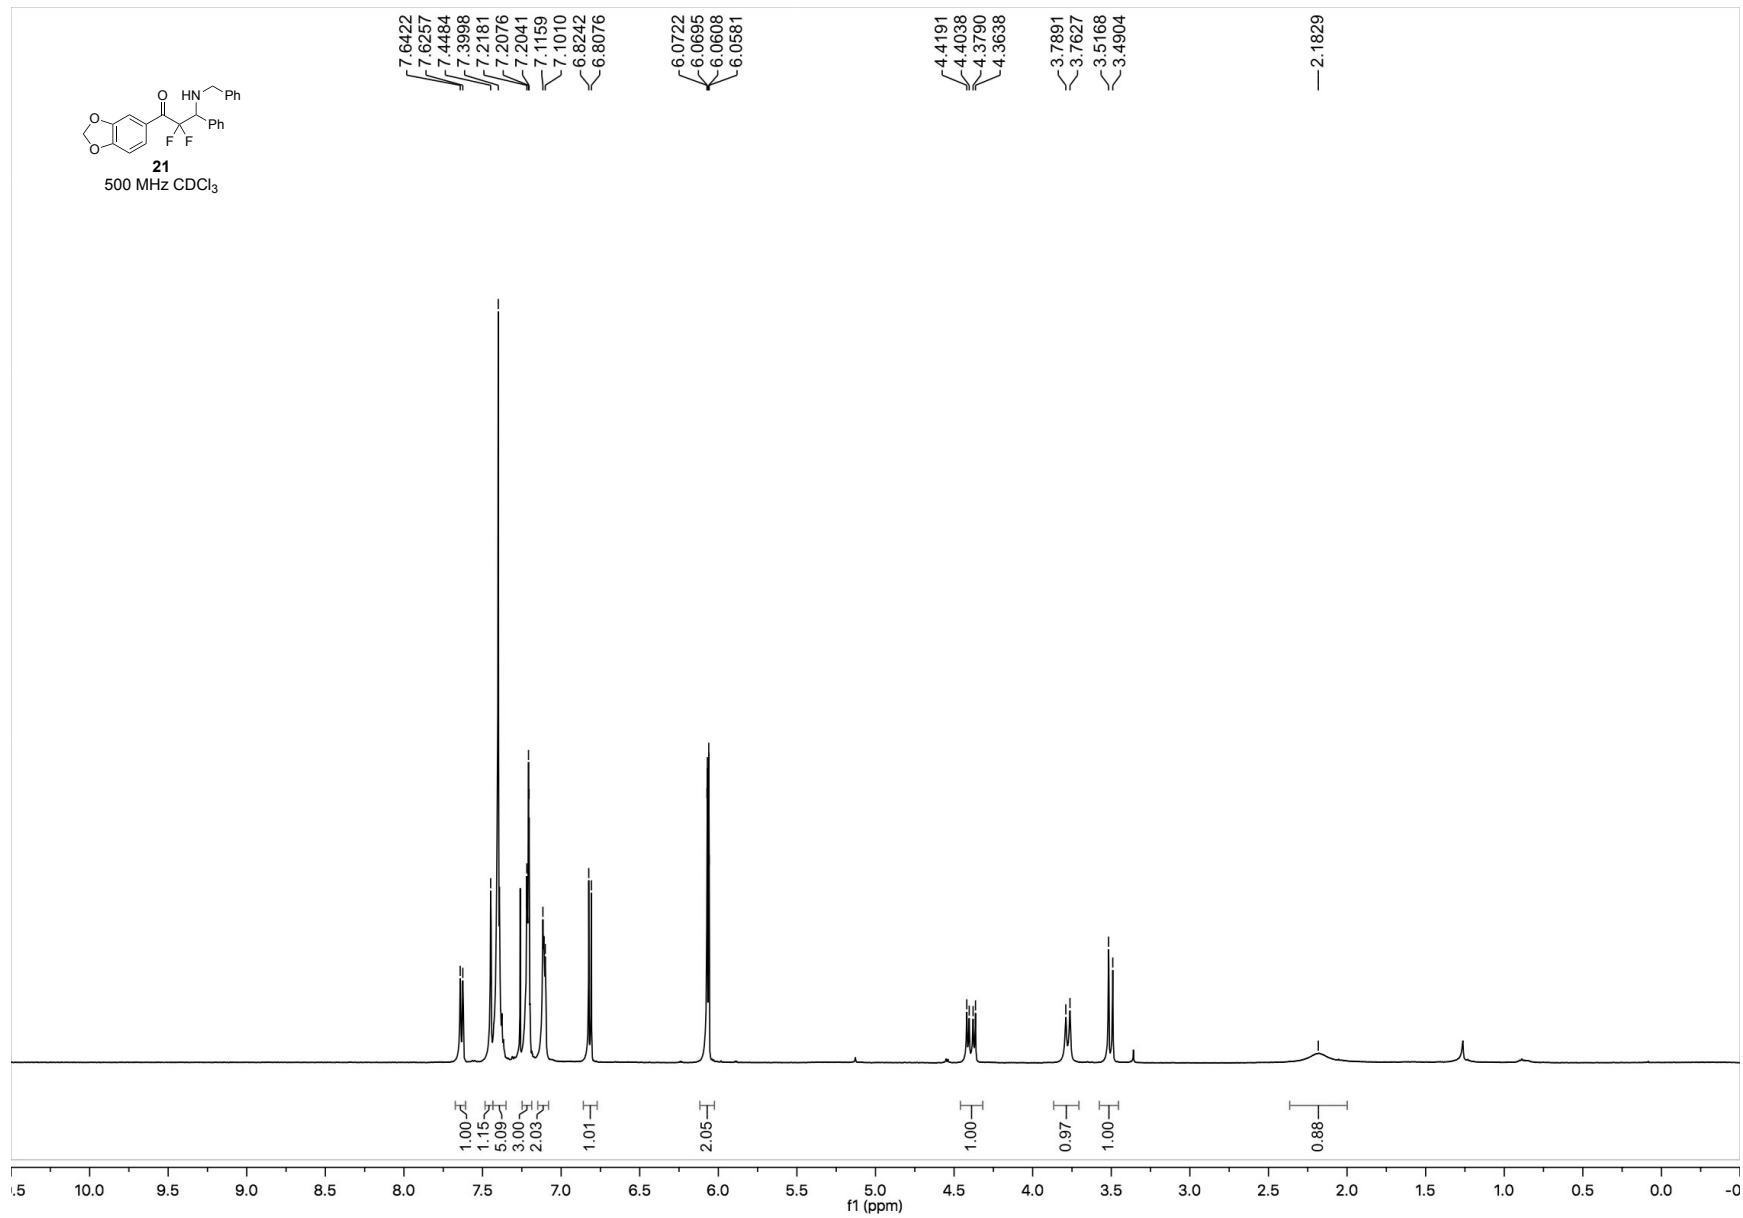

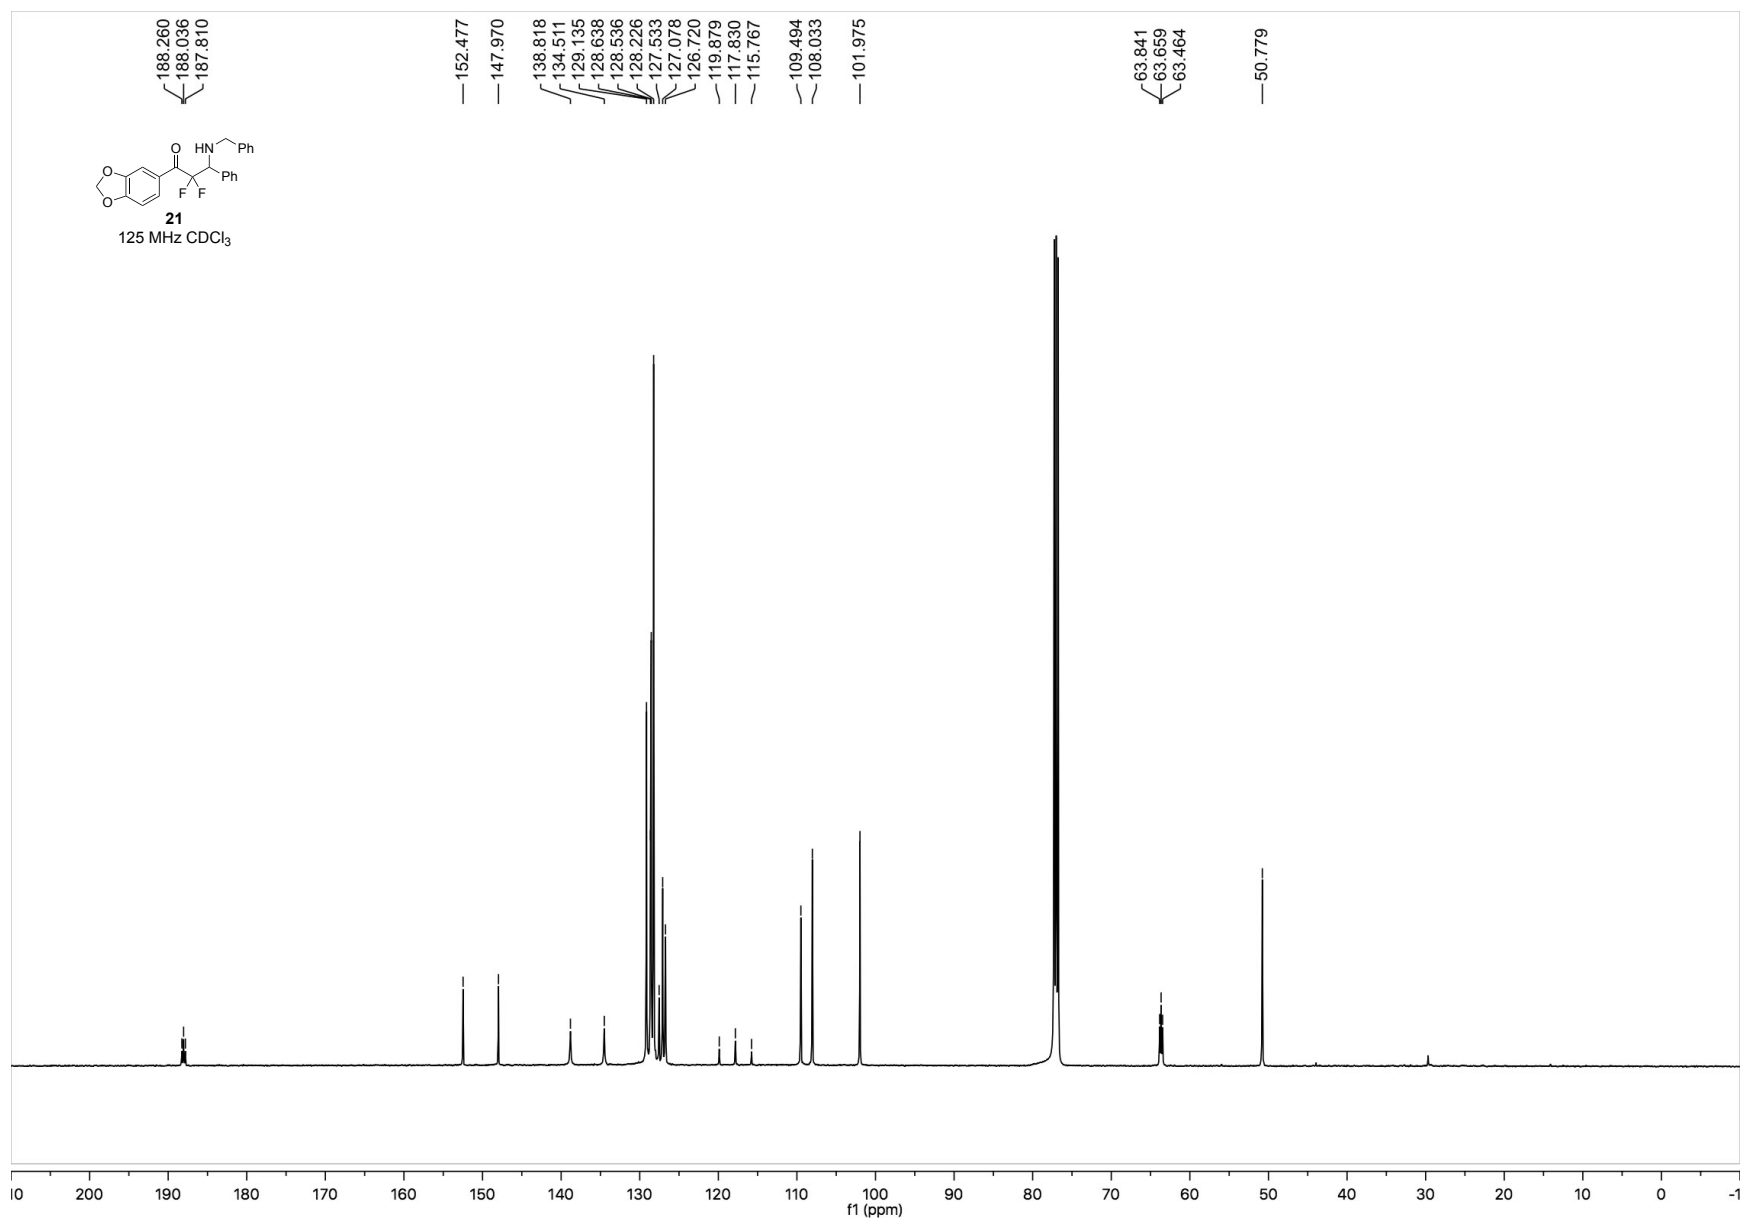

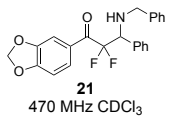

-102.383  
-102.399  
-102.956  
-102.971  
-114.516  
-114.558  
-115.088  
-115.131

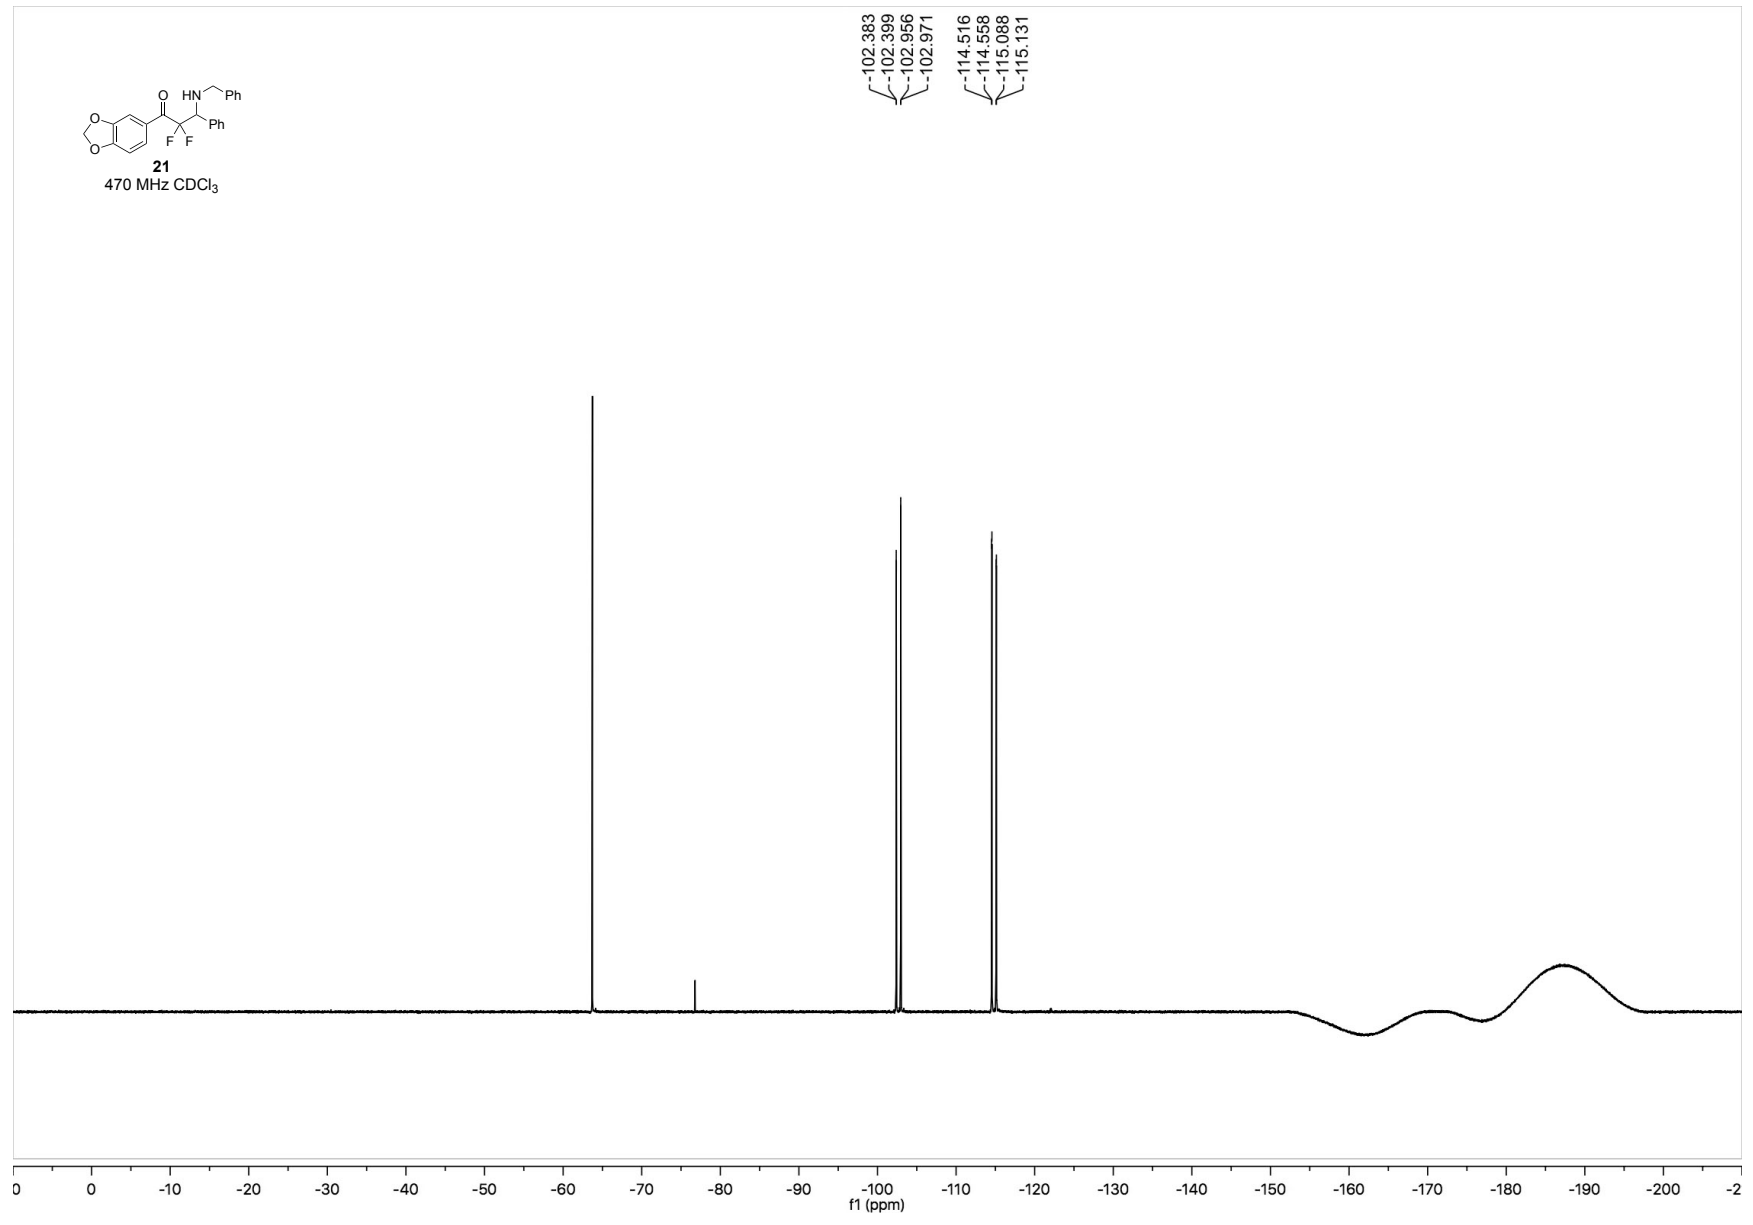

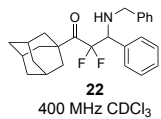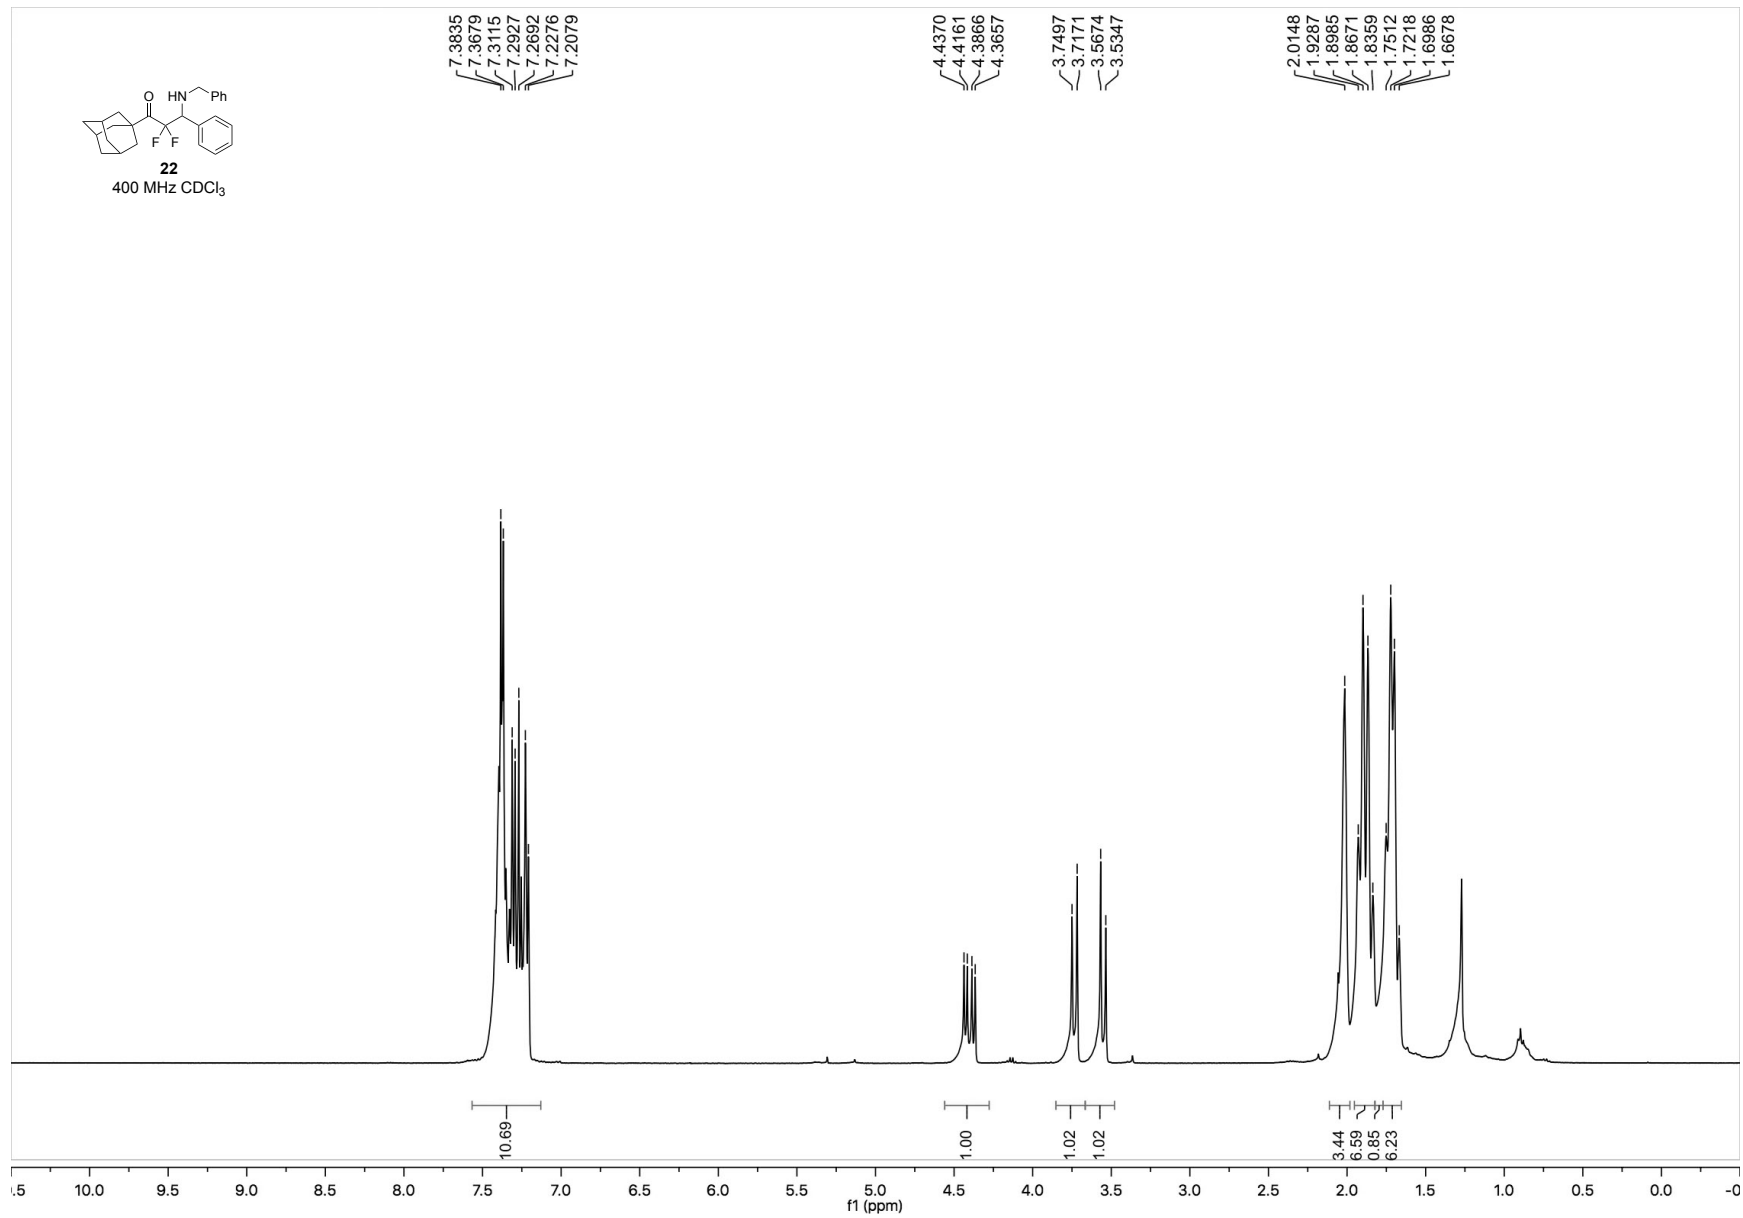



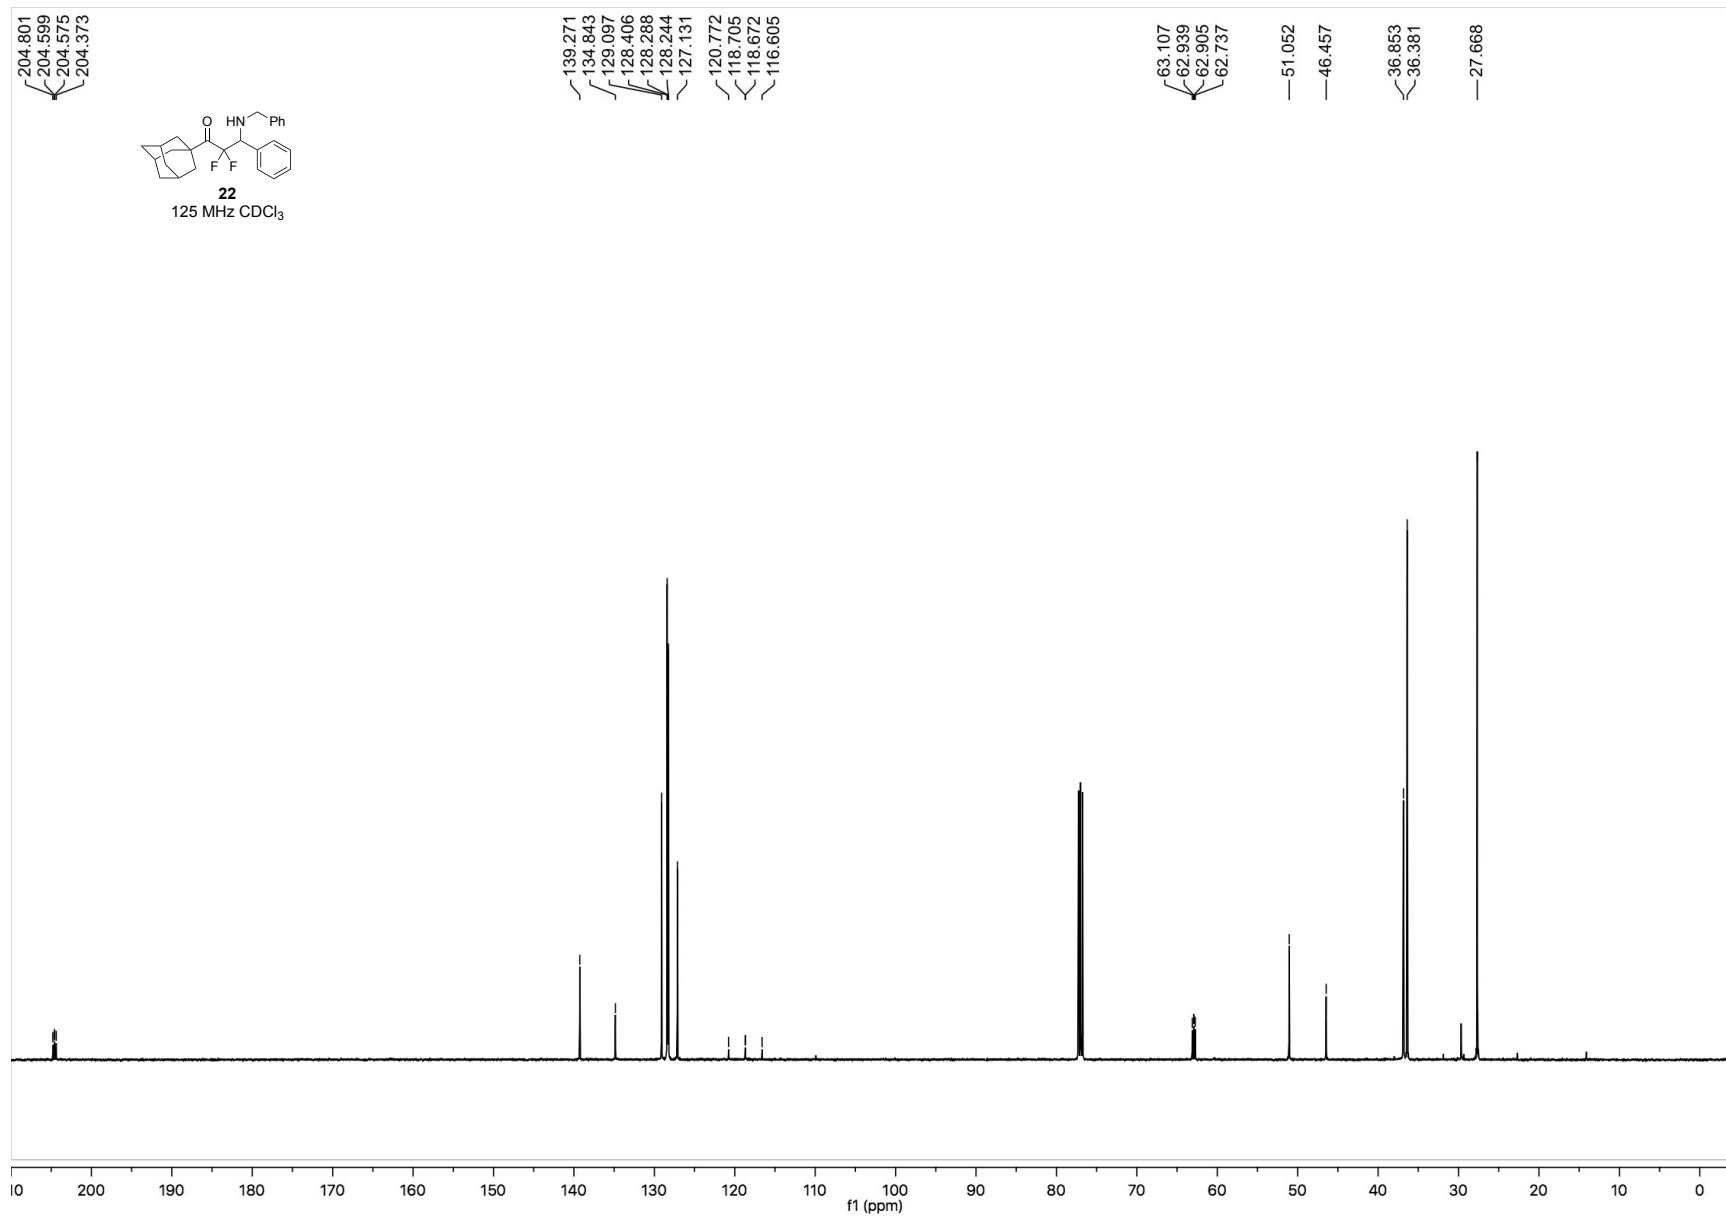

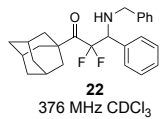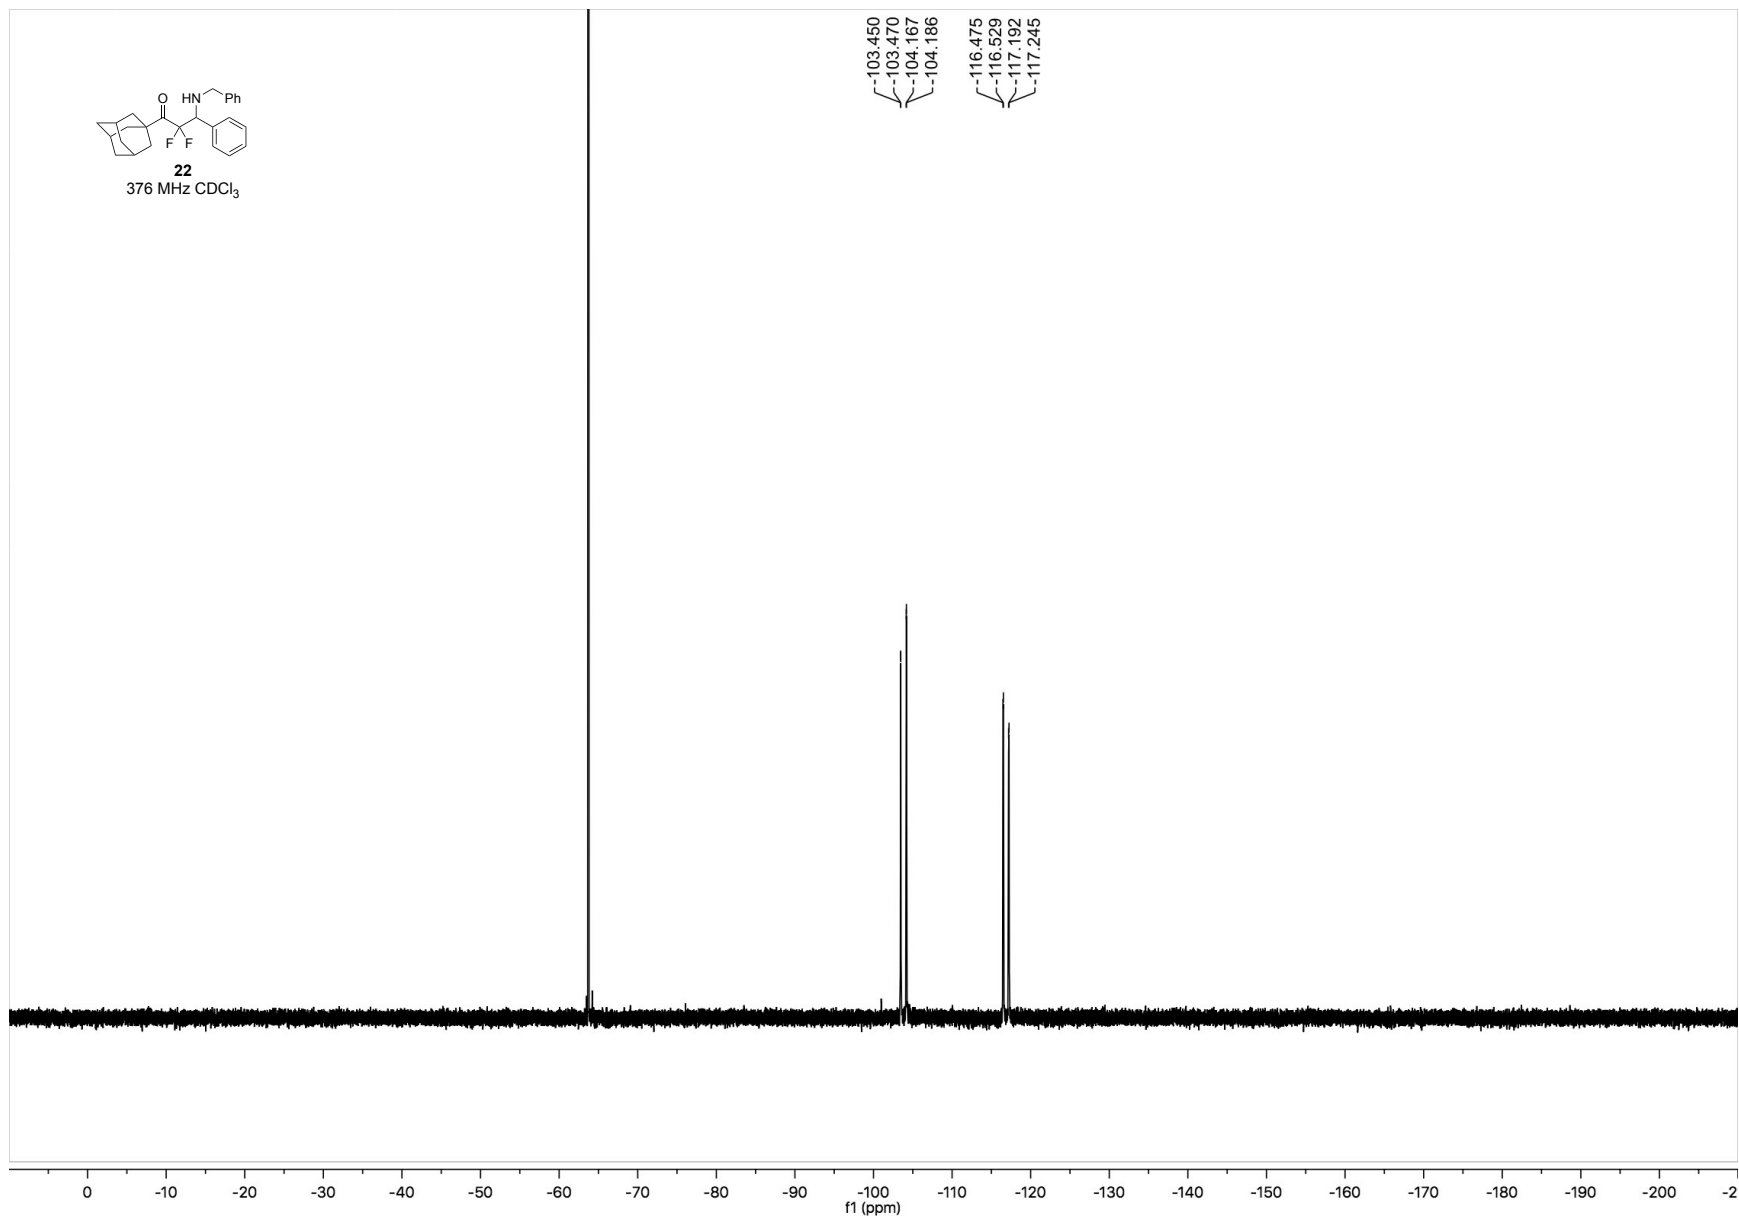

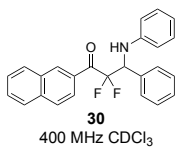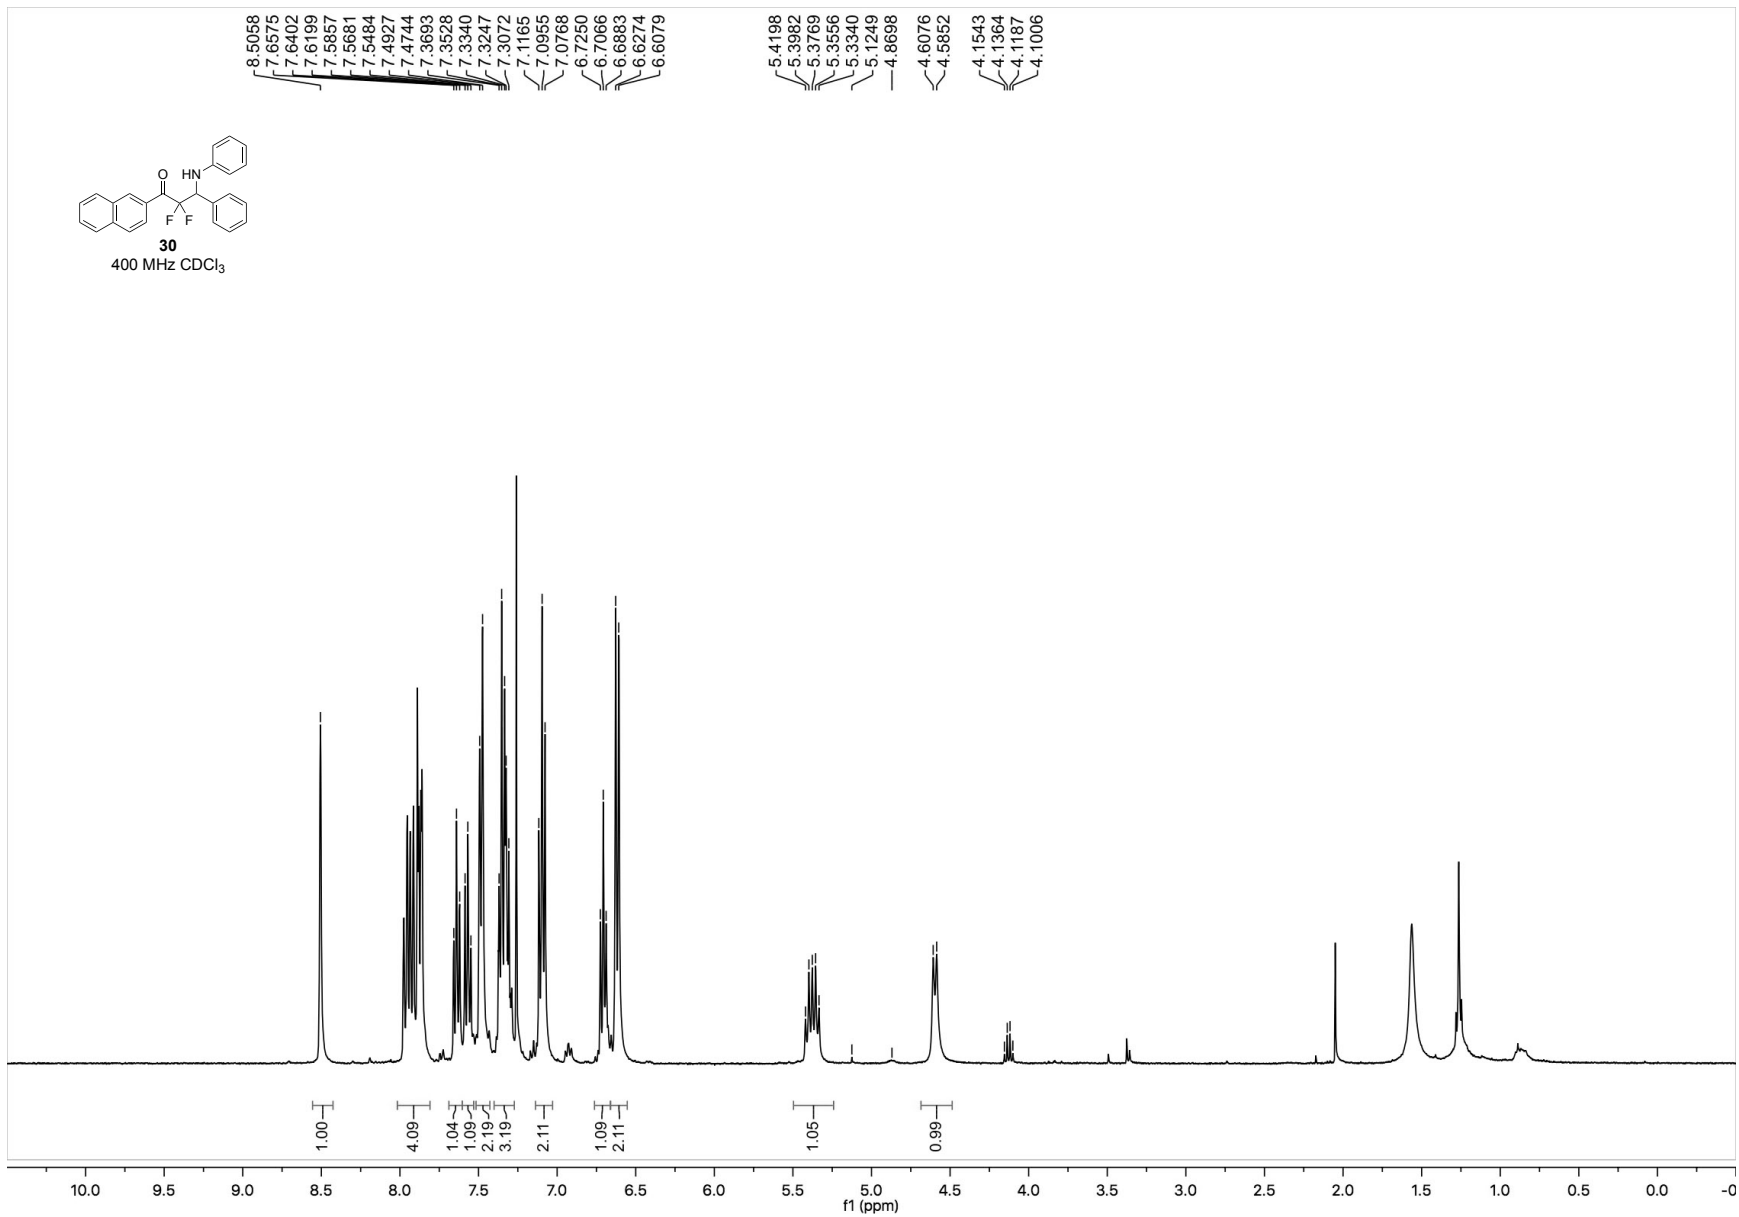

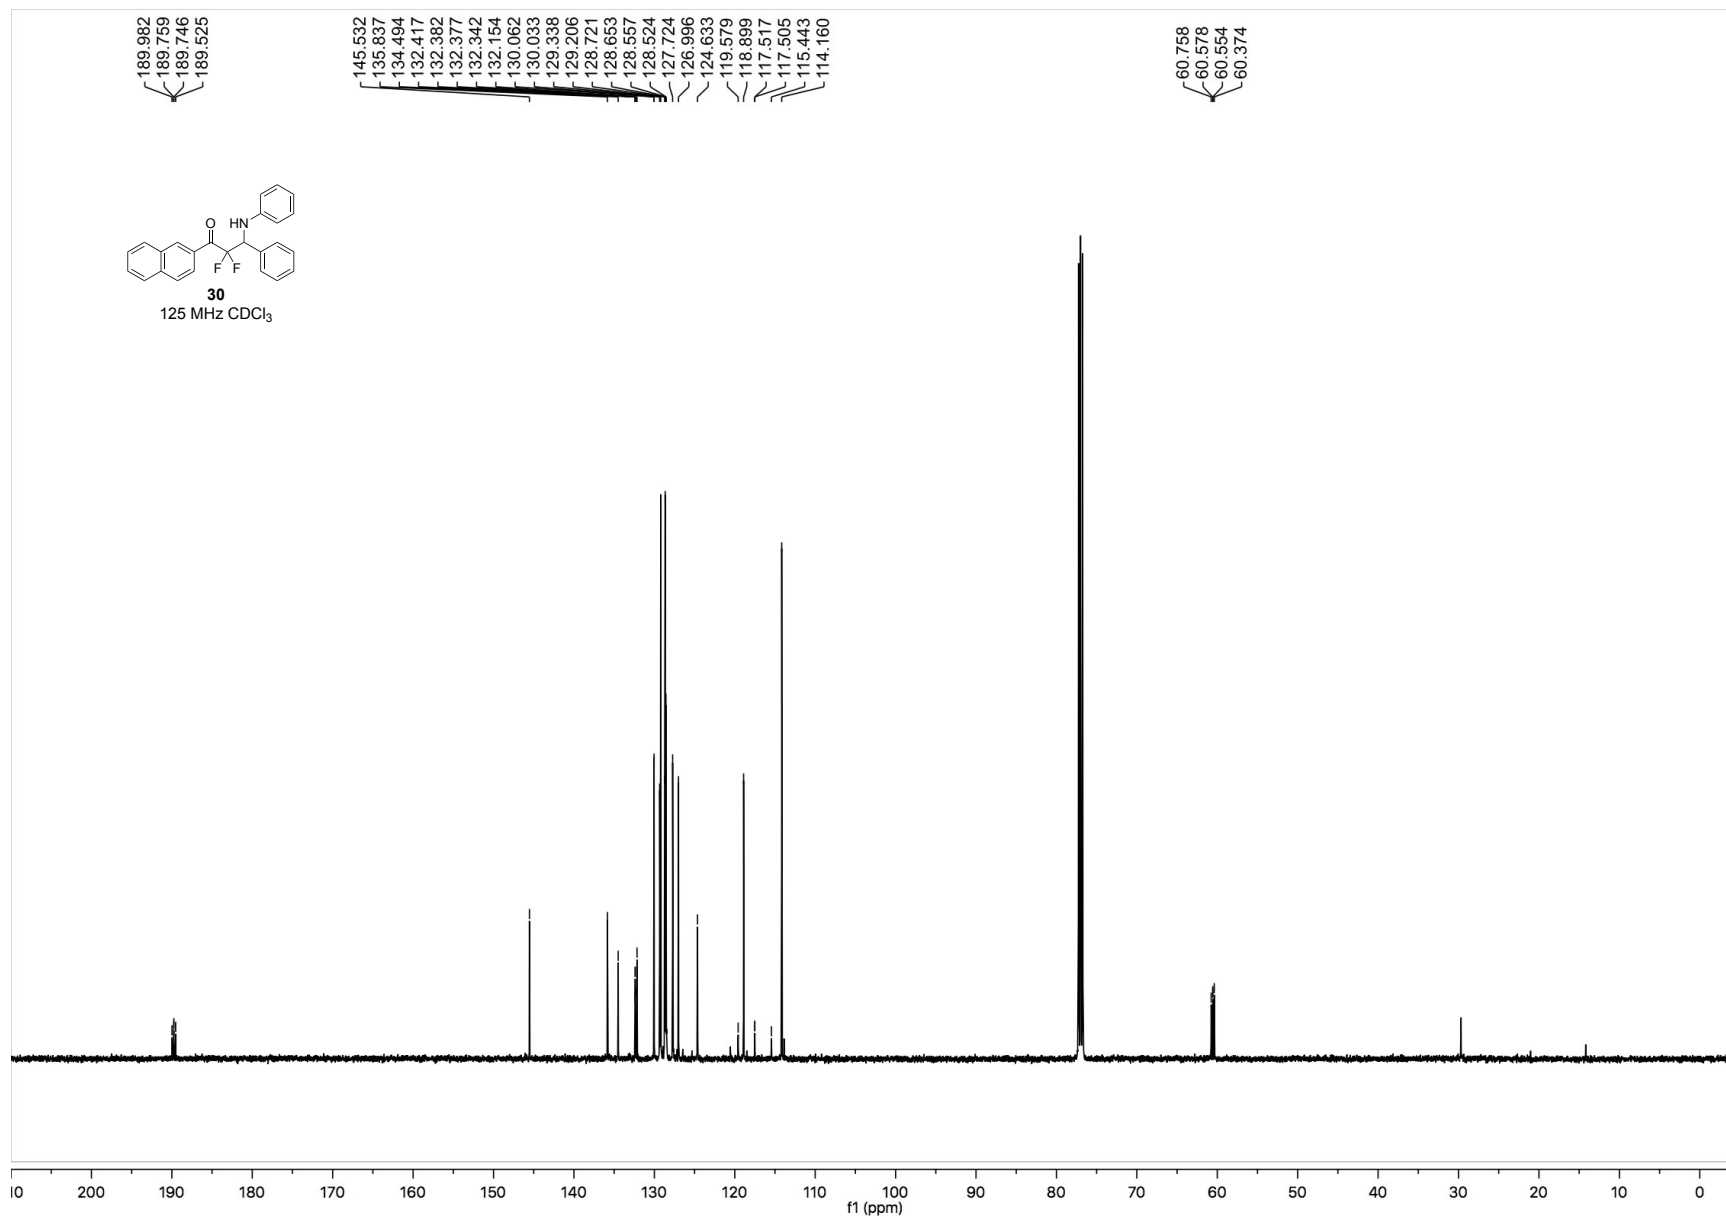

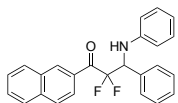

**30**  
376 MHz CDCl<sub>3</sub>

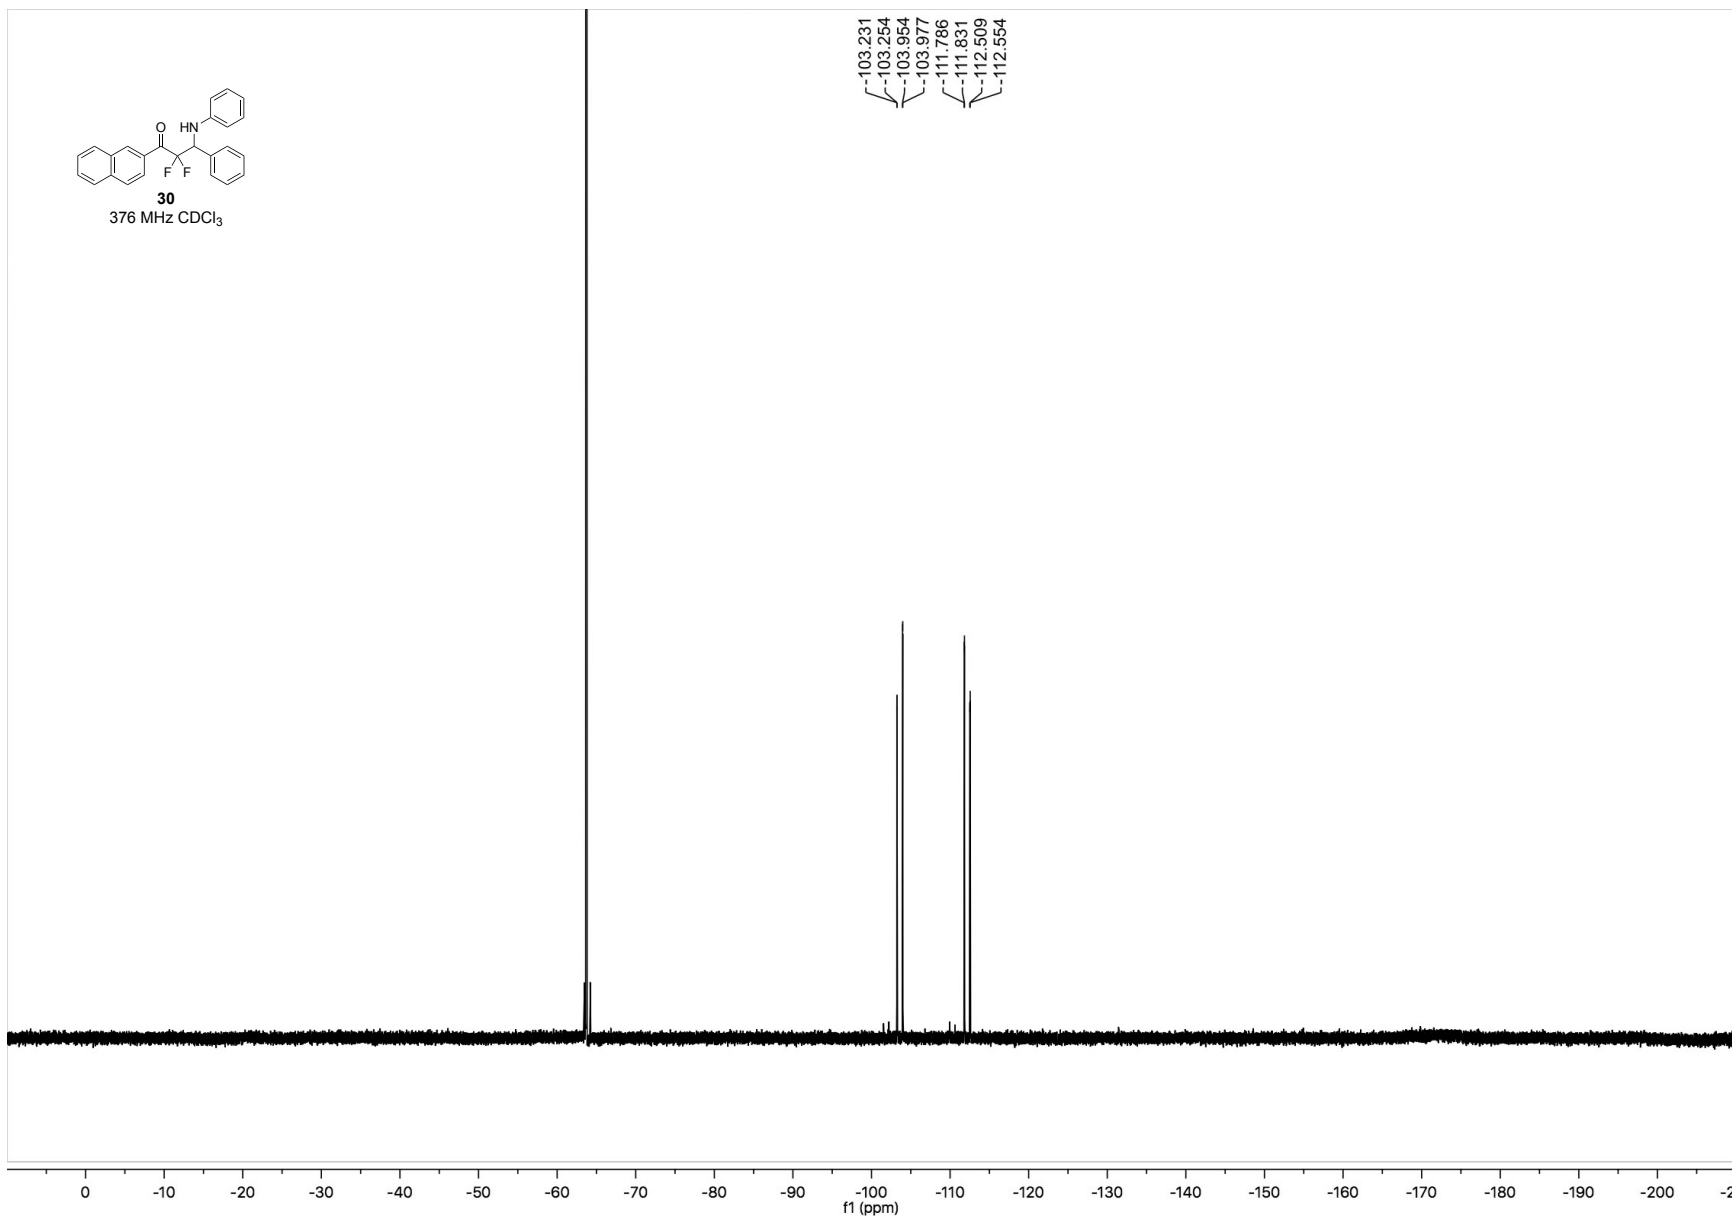

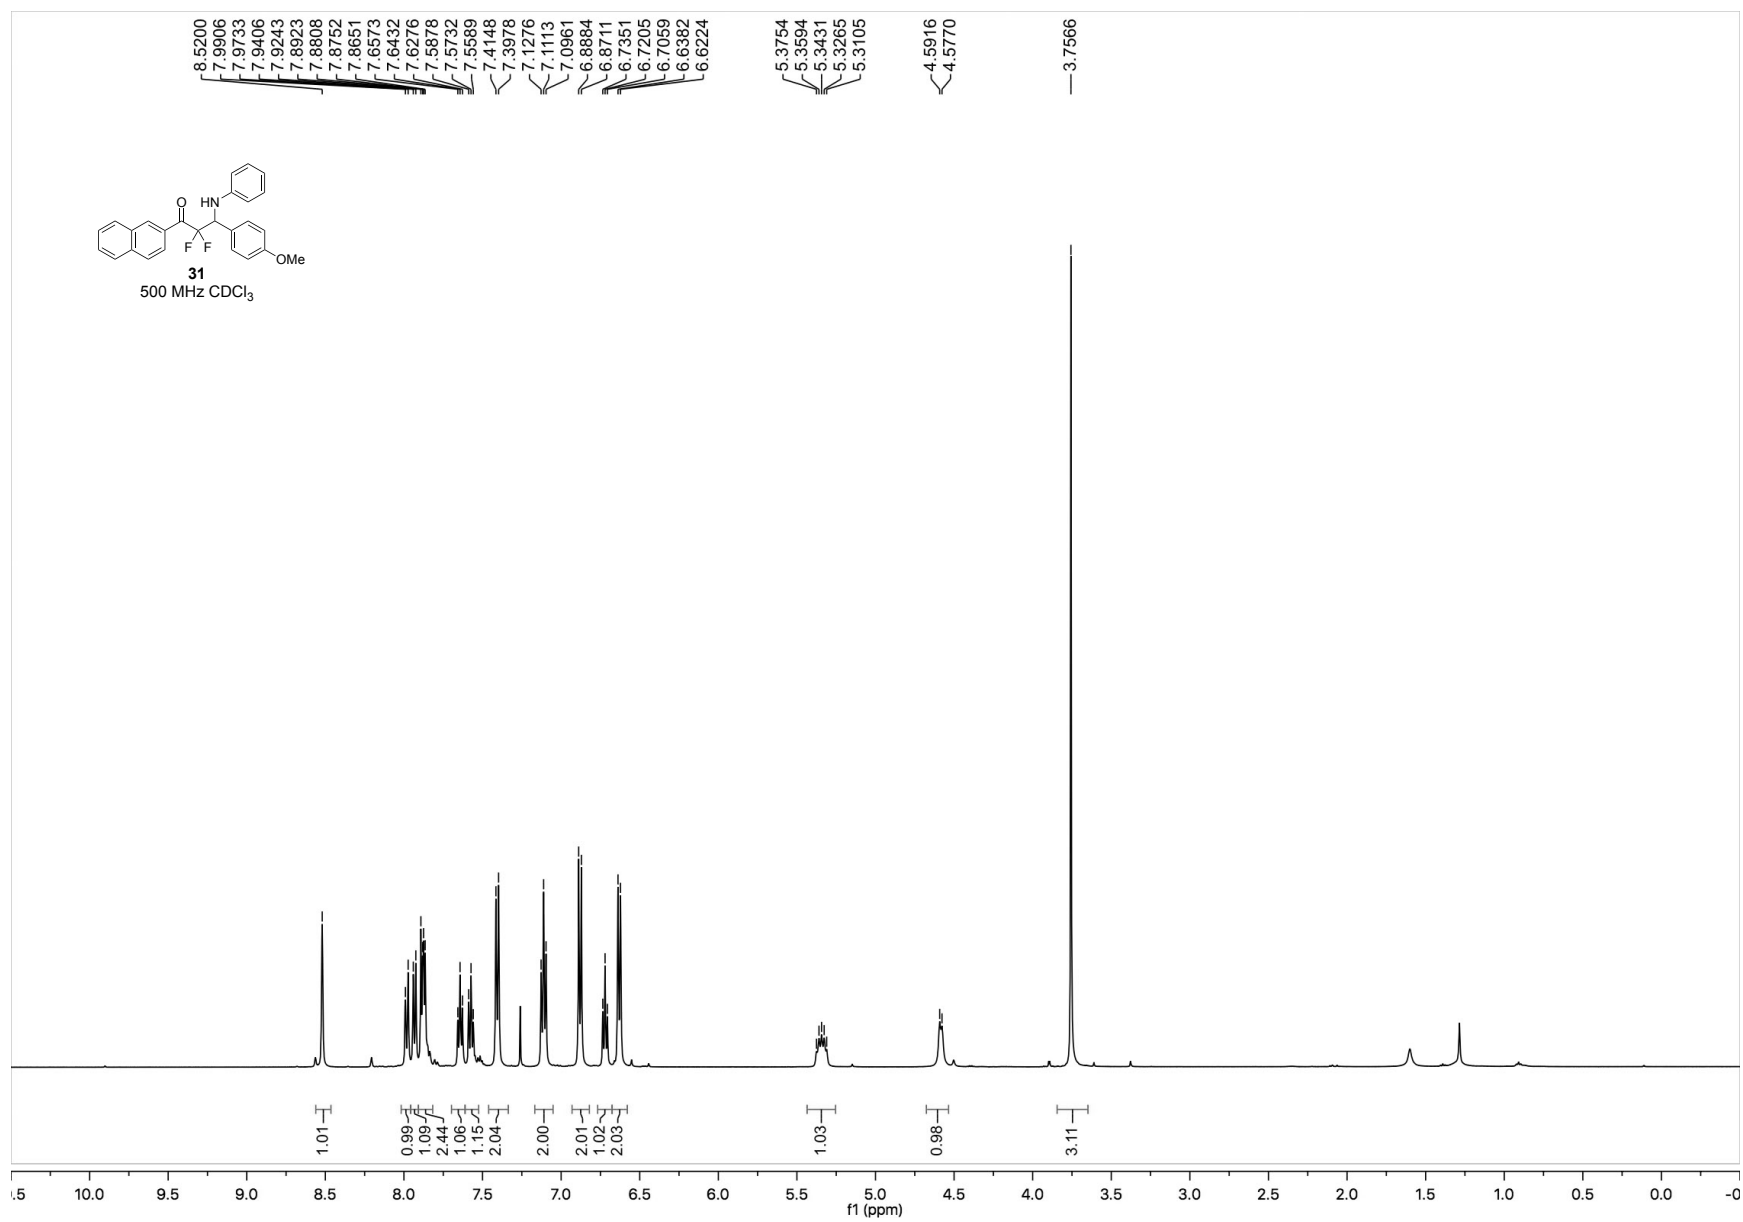

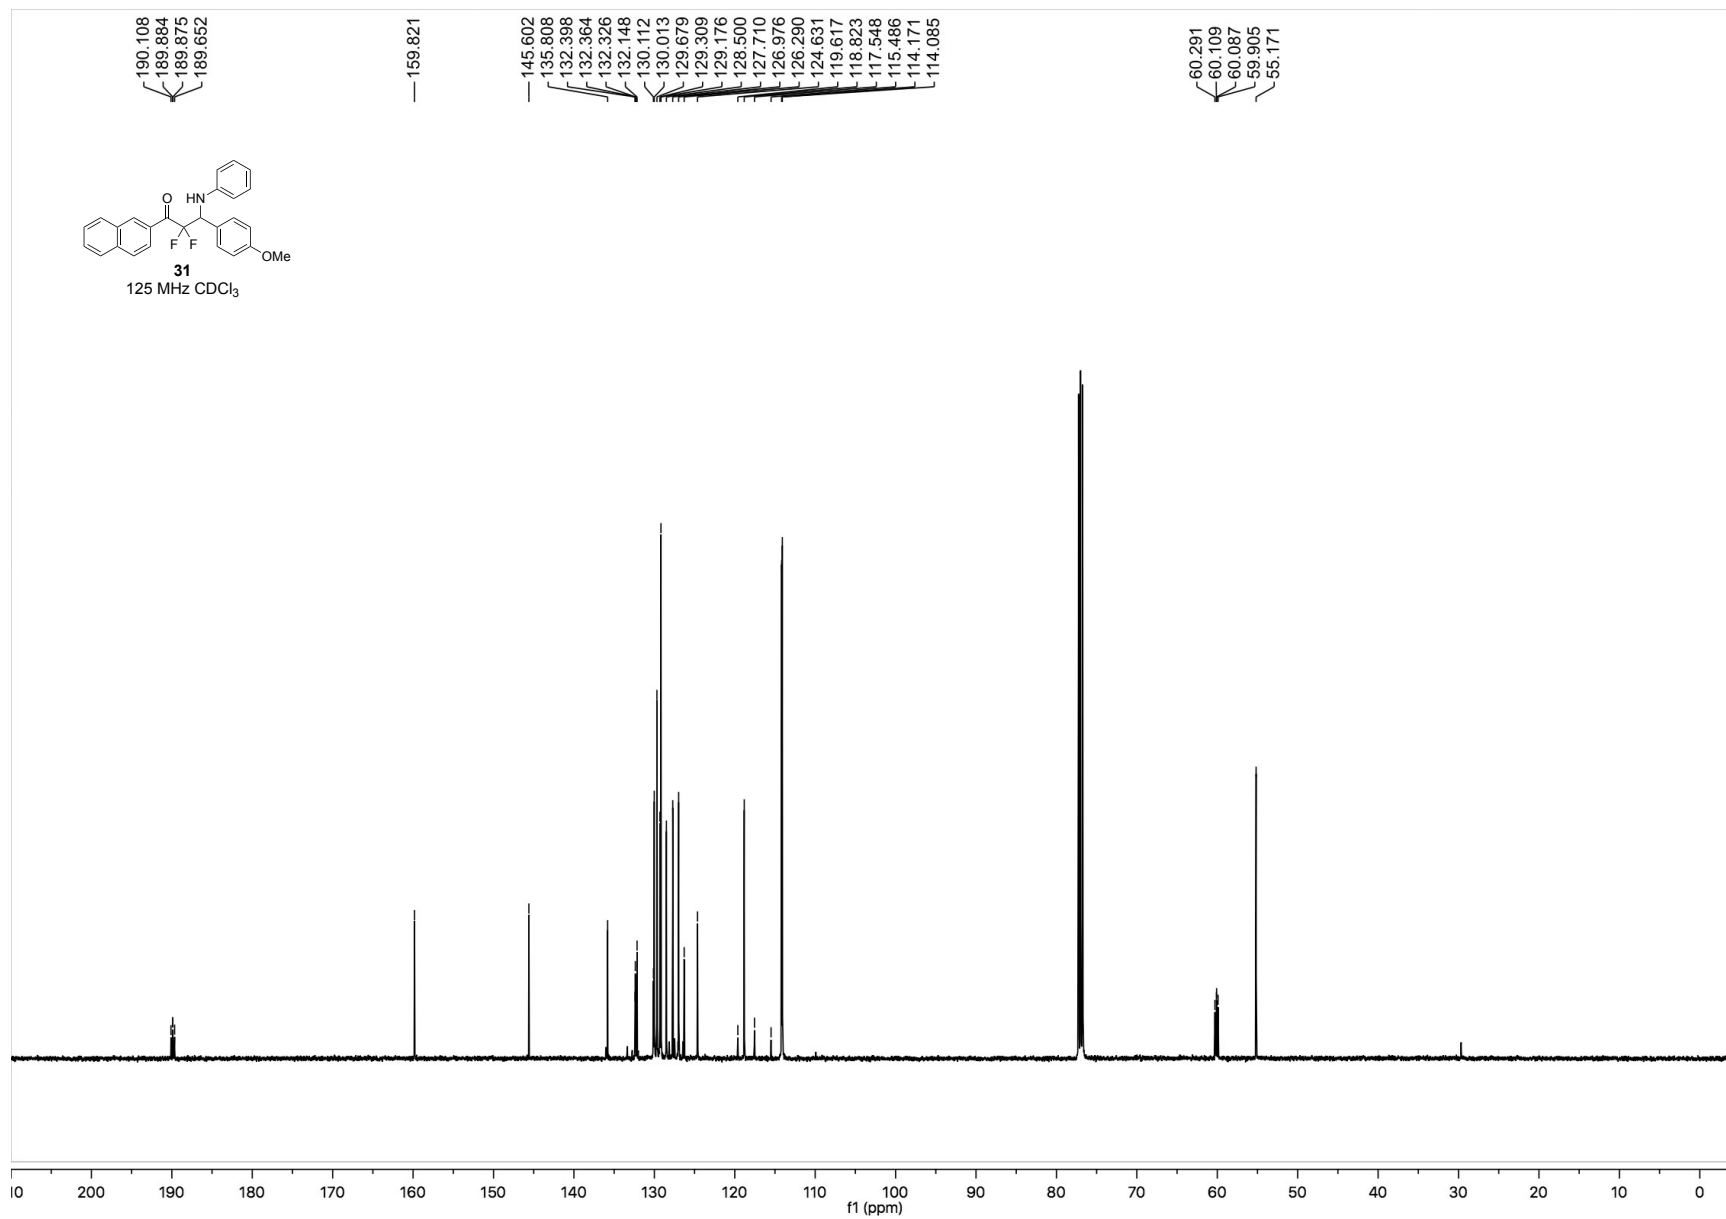

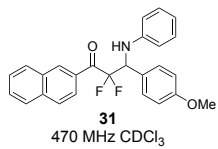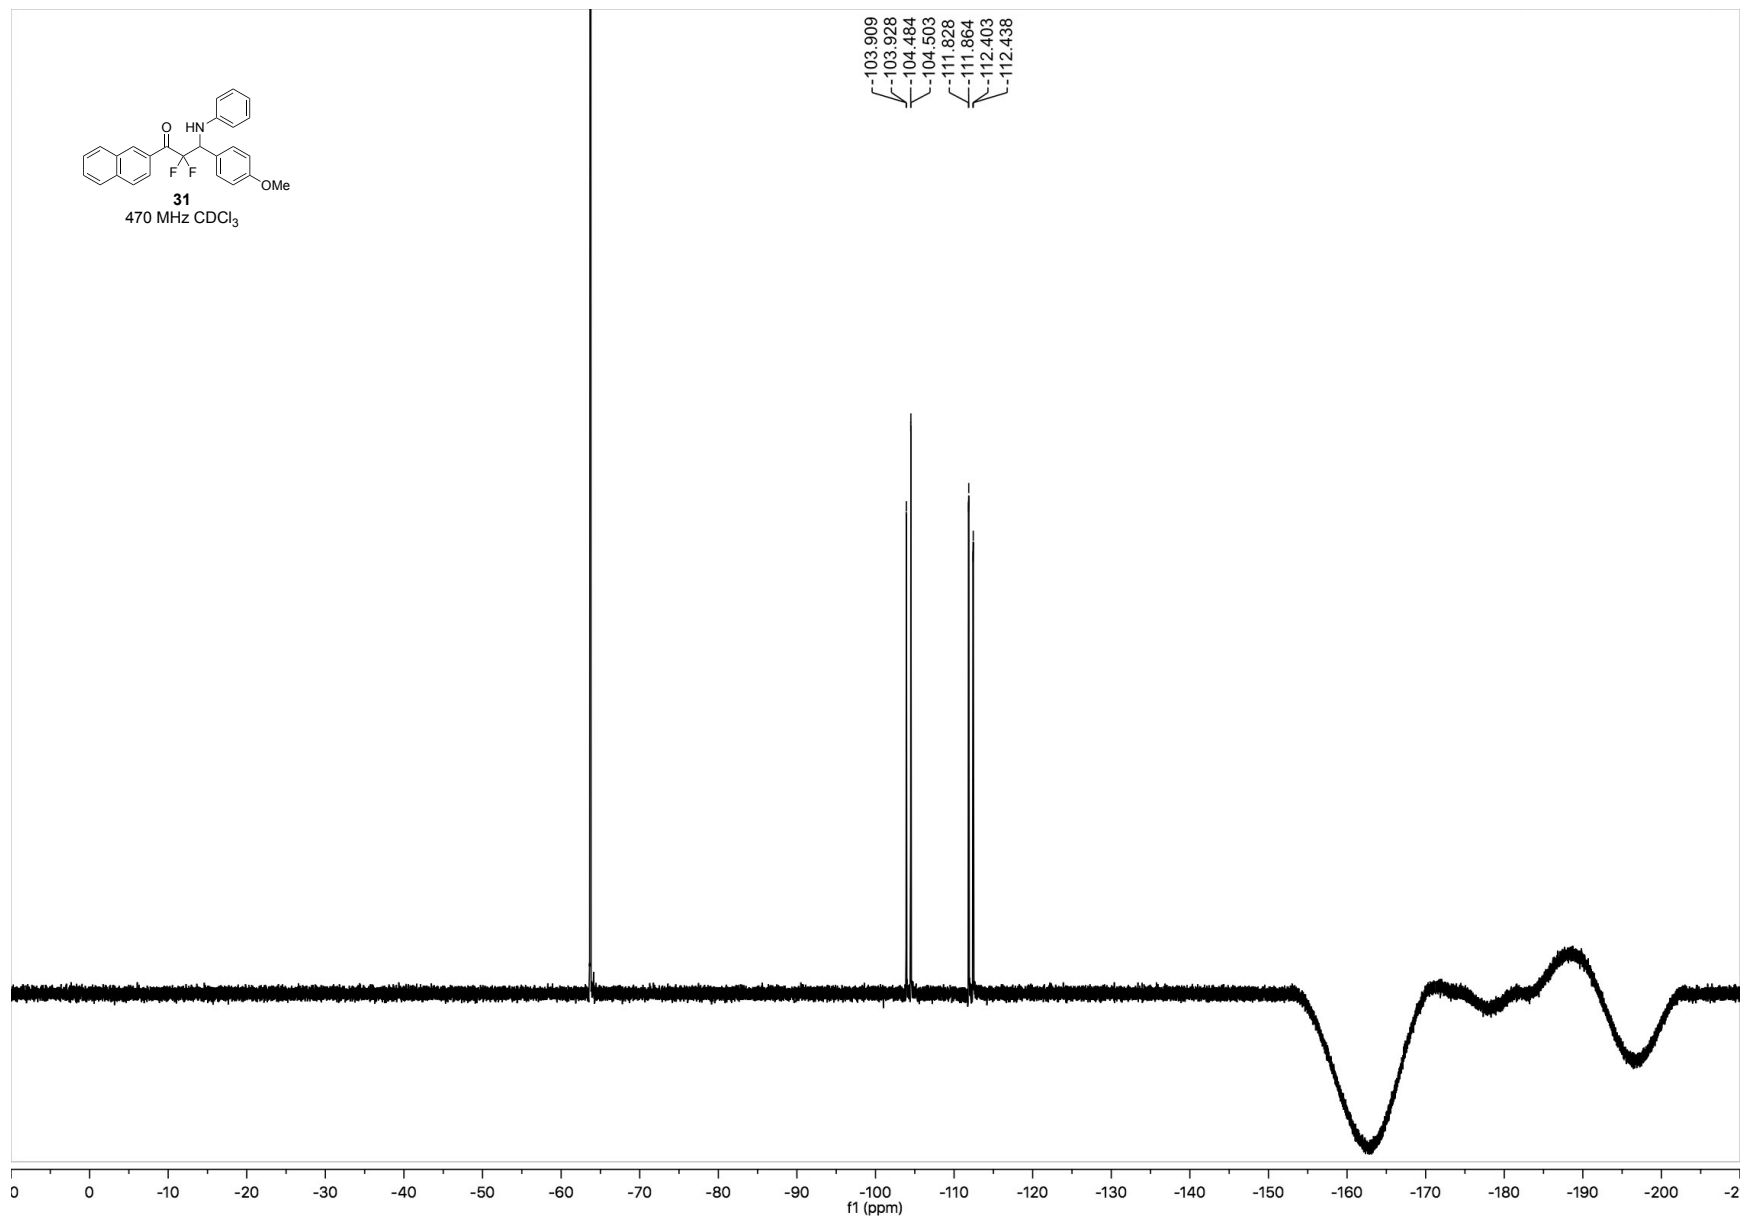



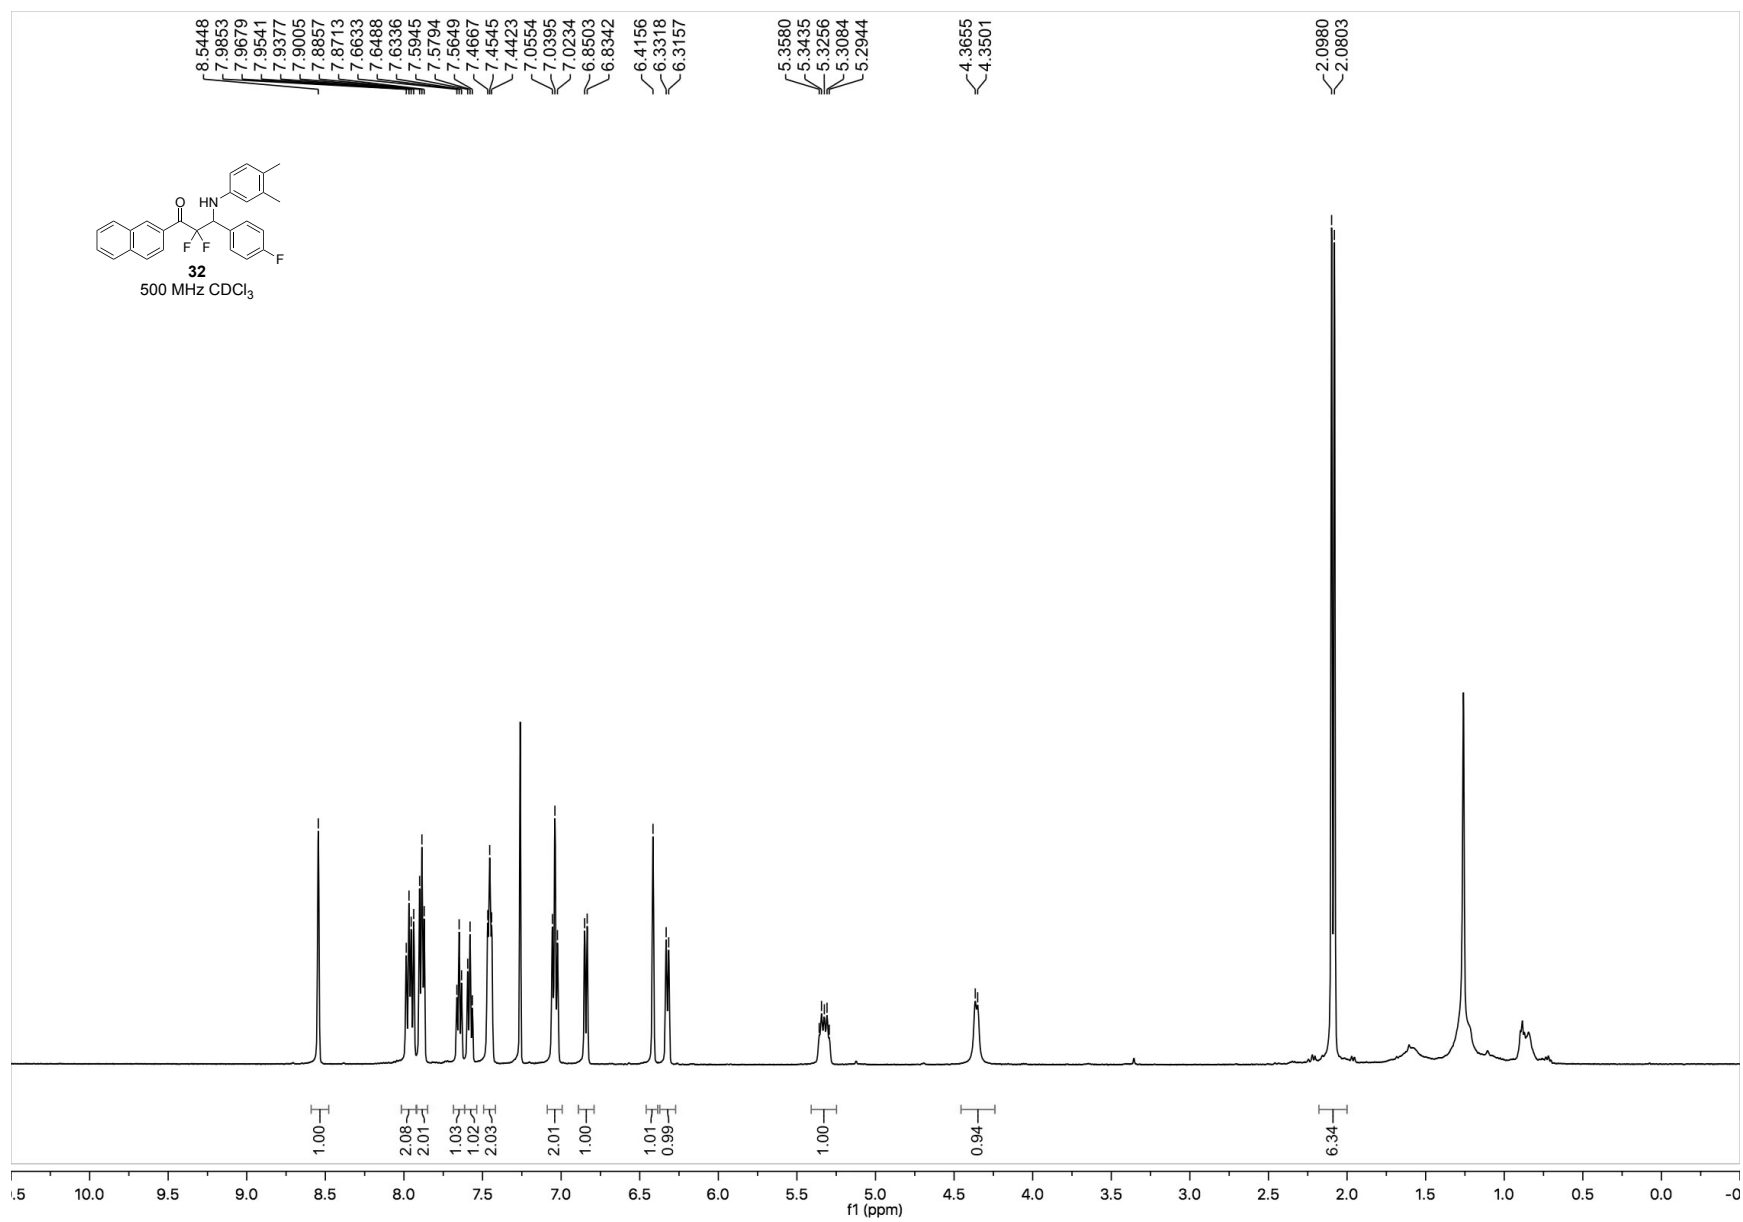

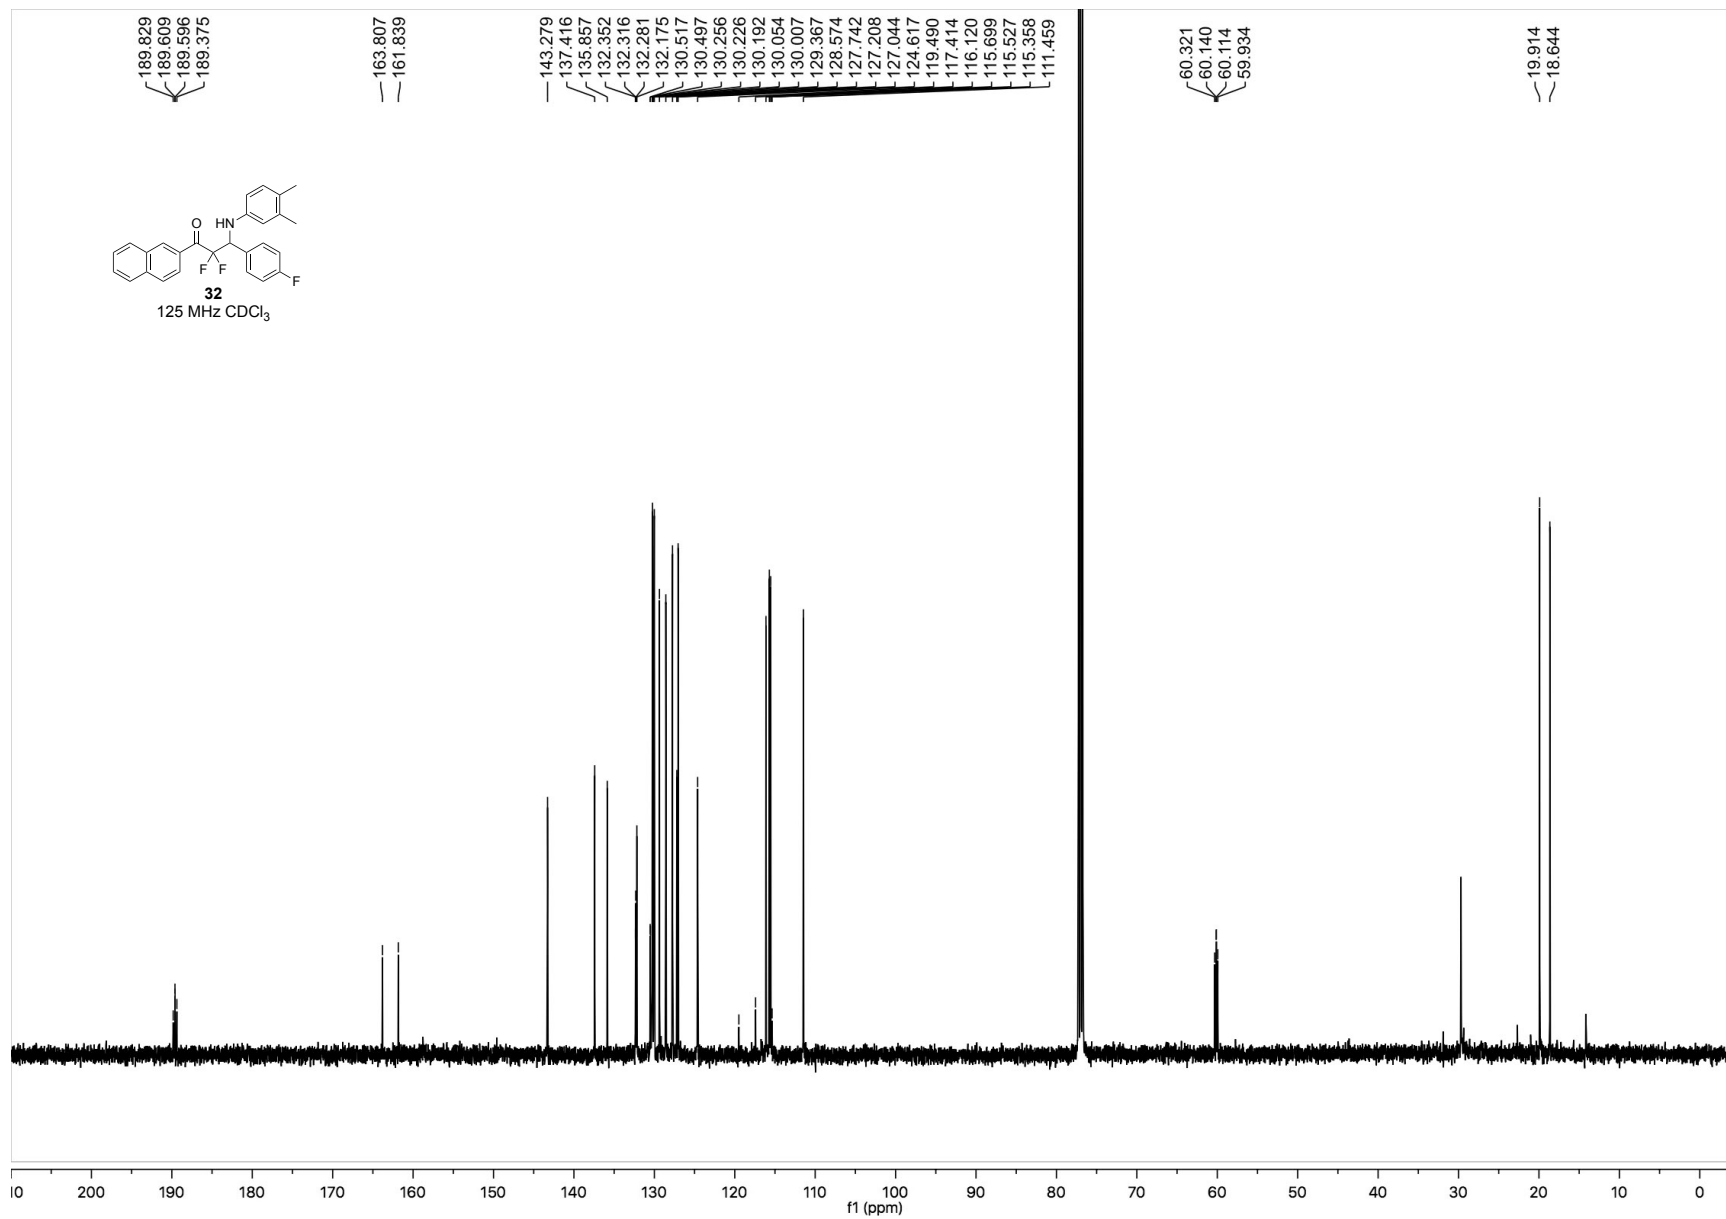

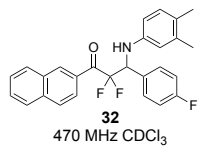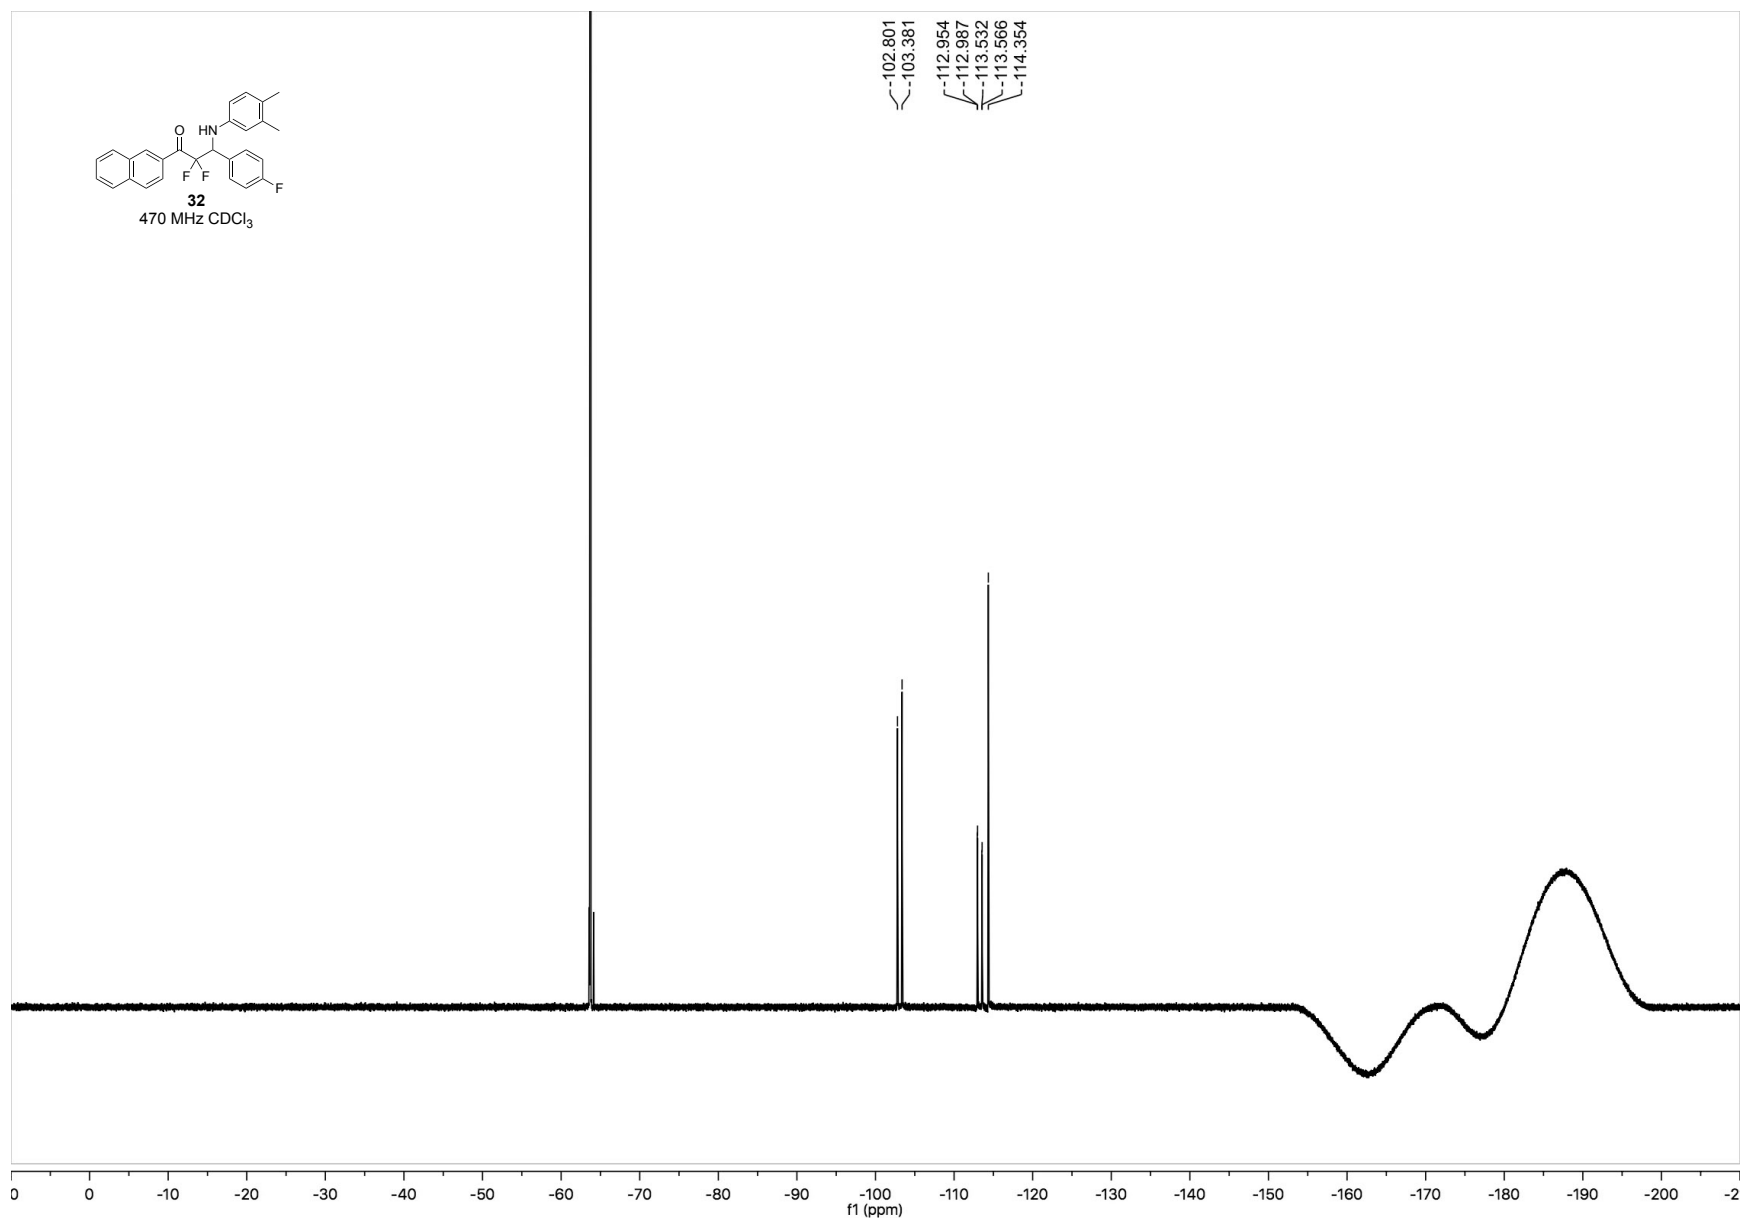

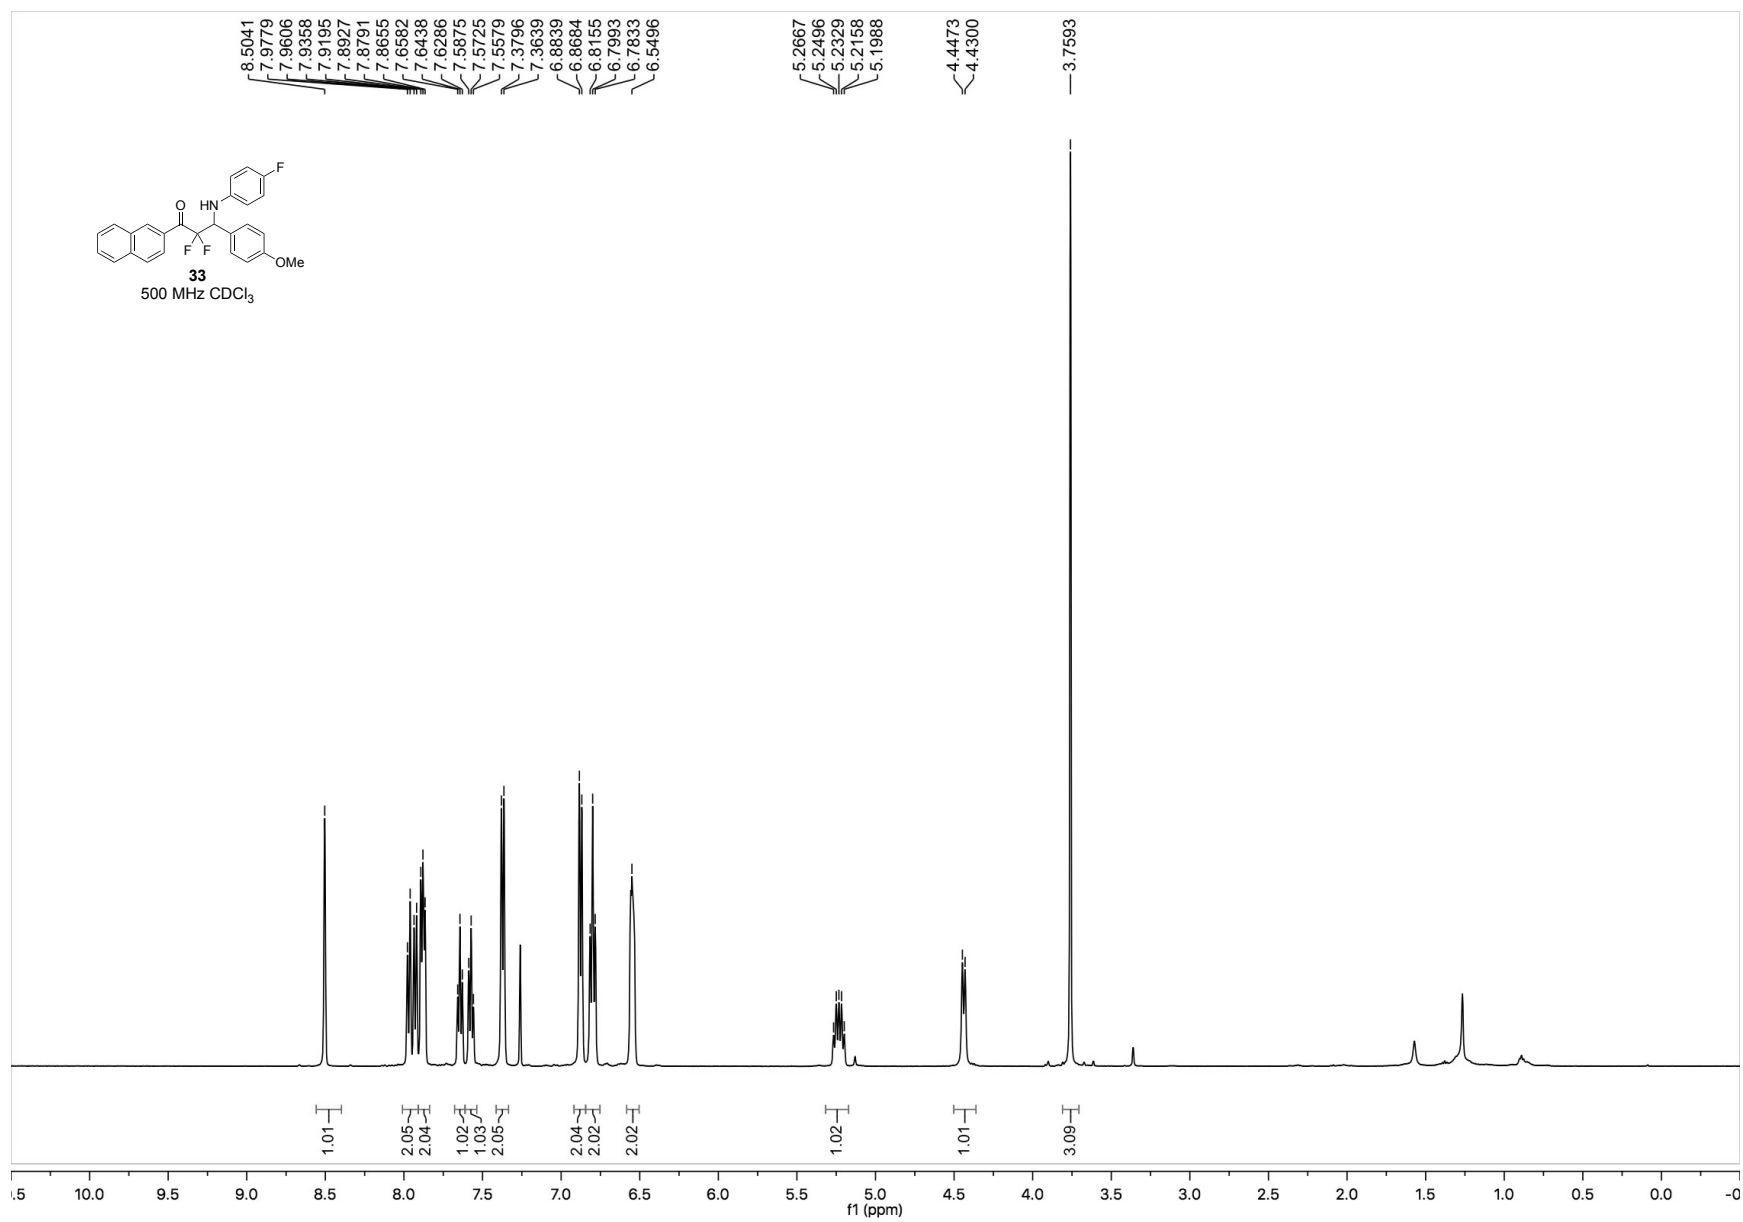

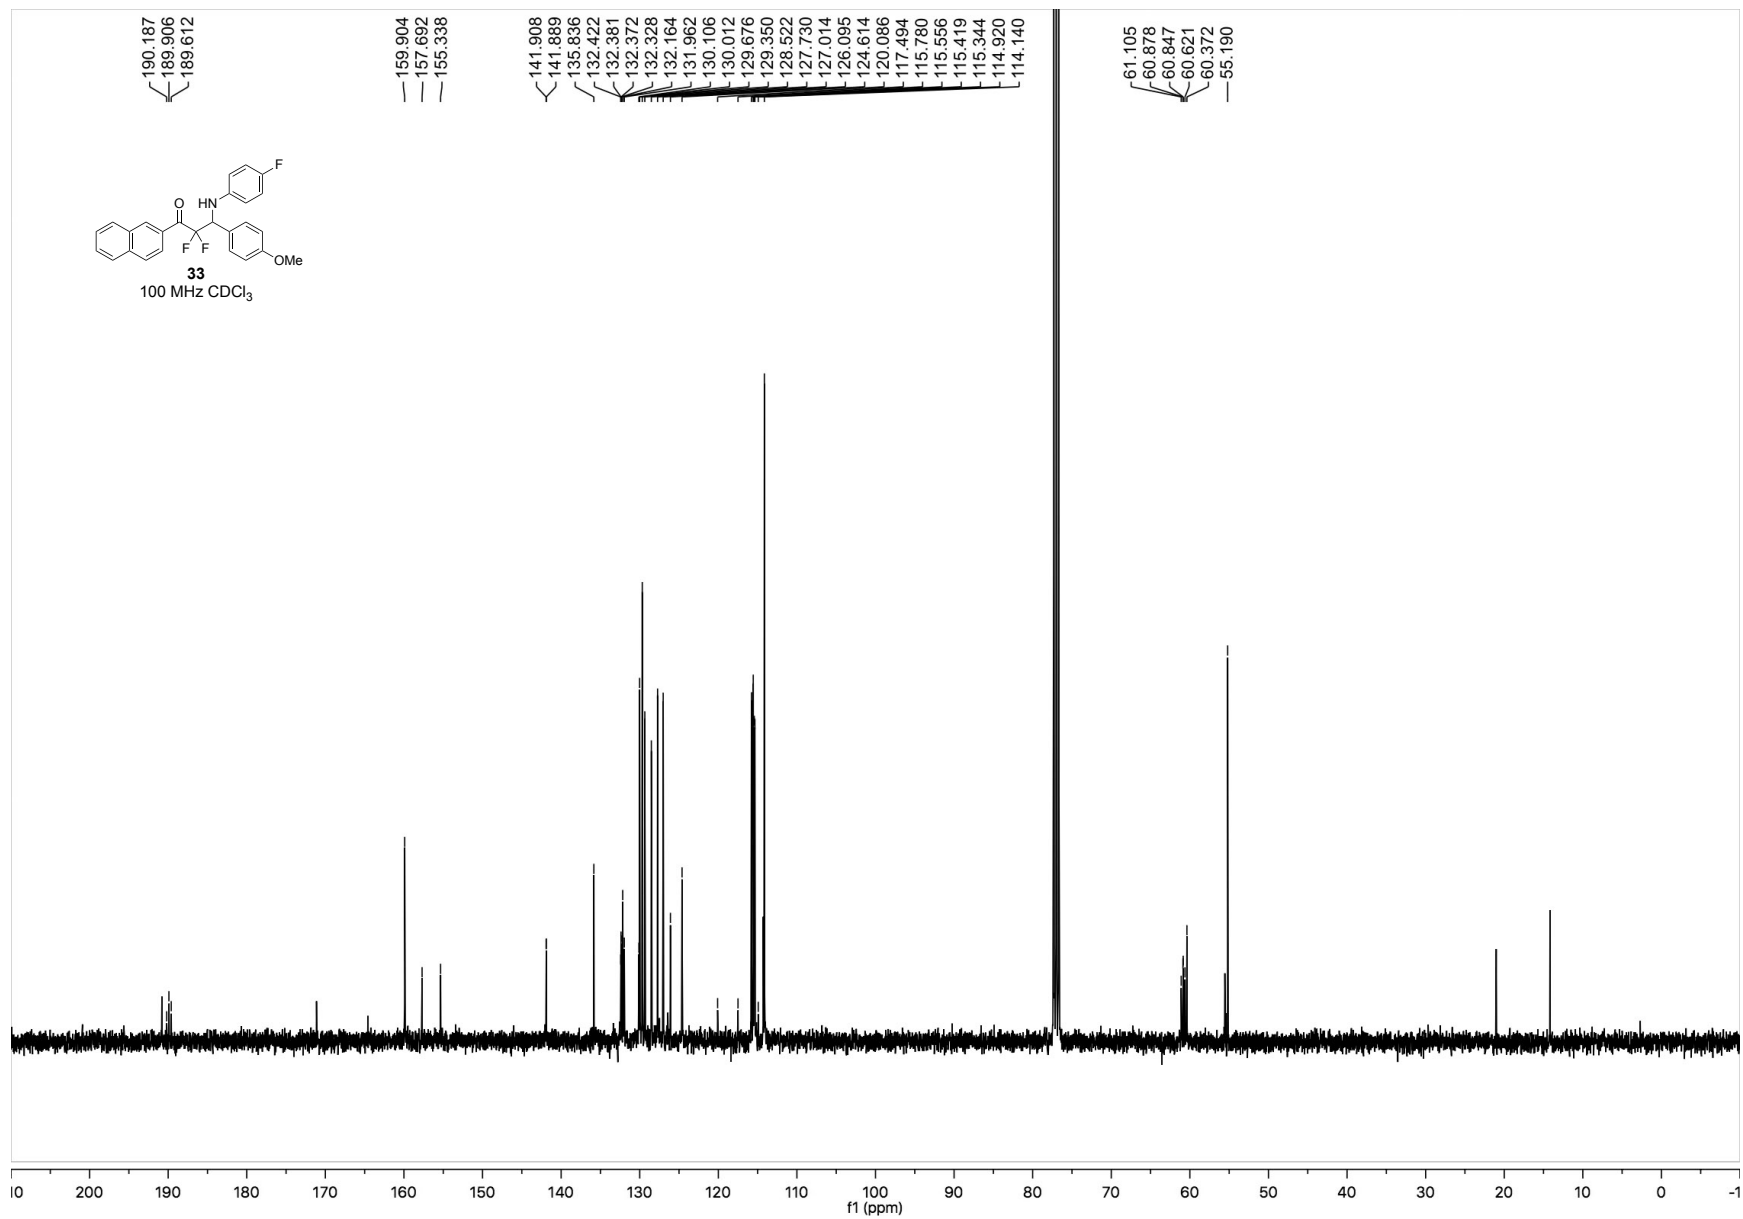

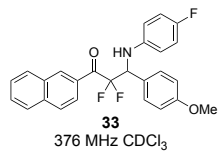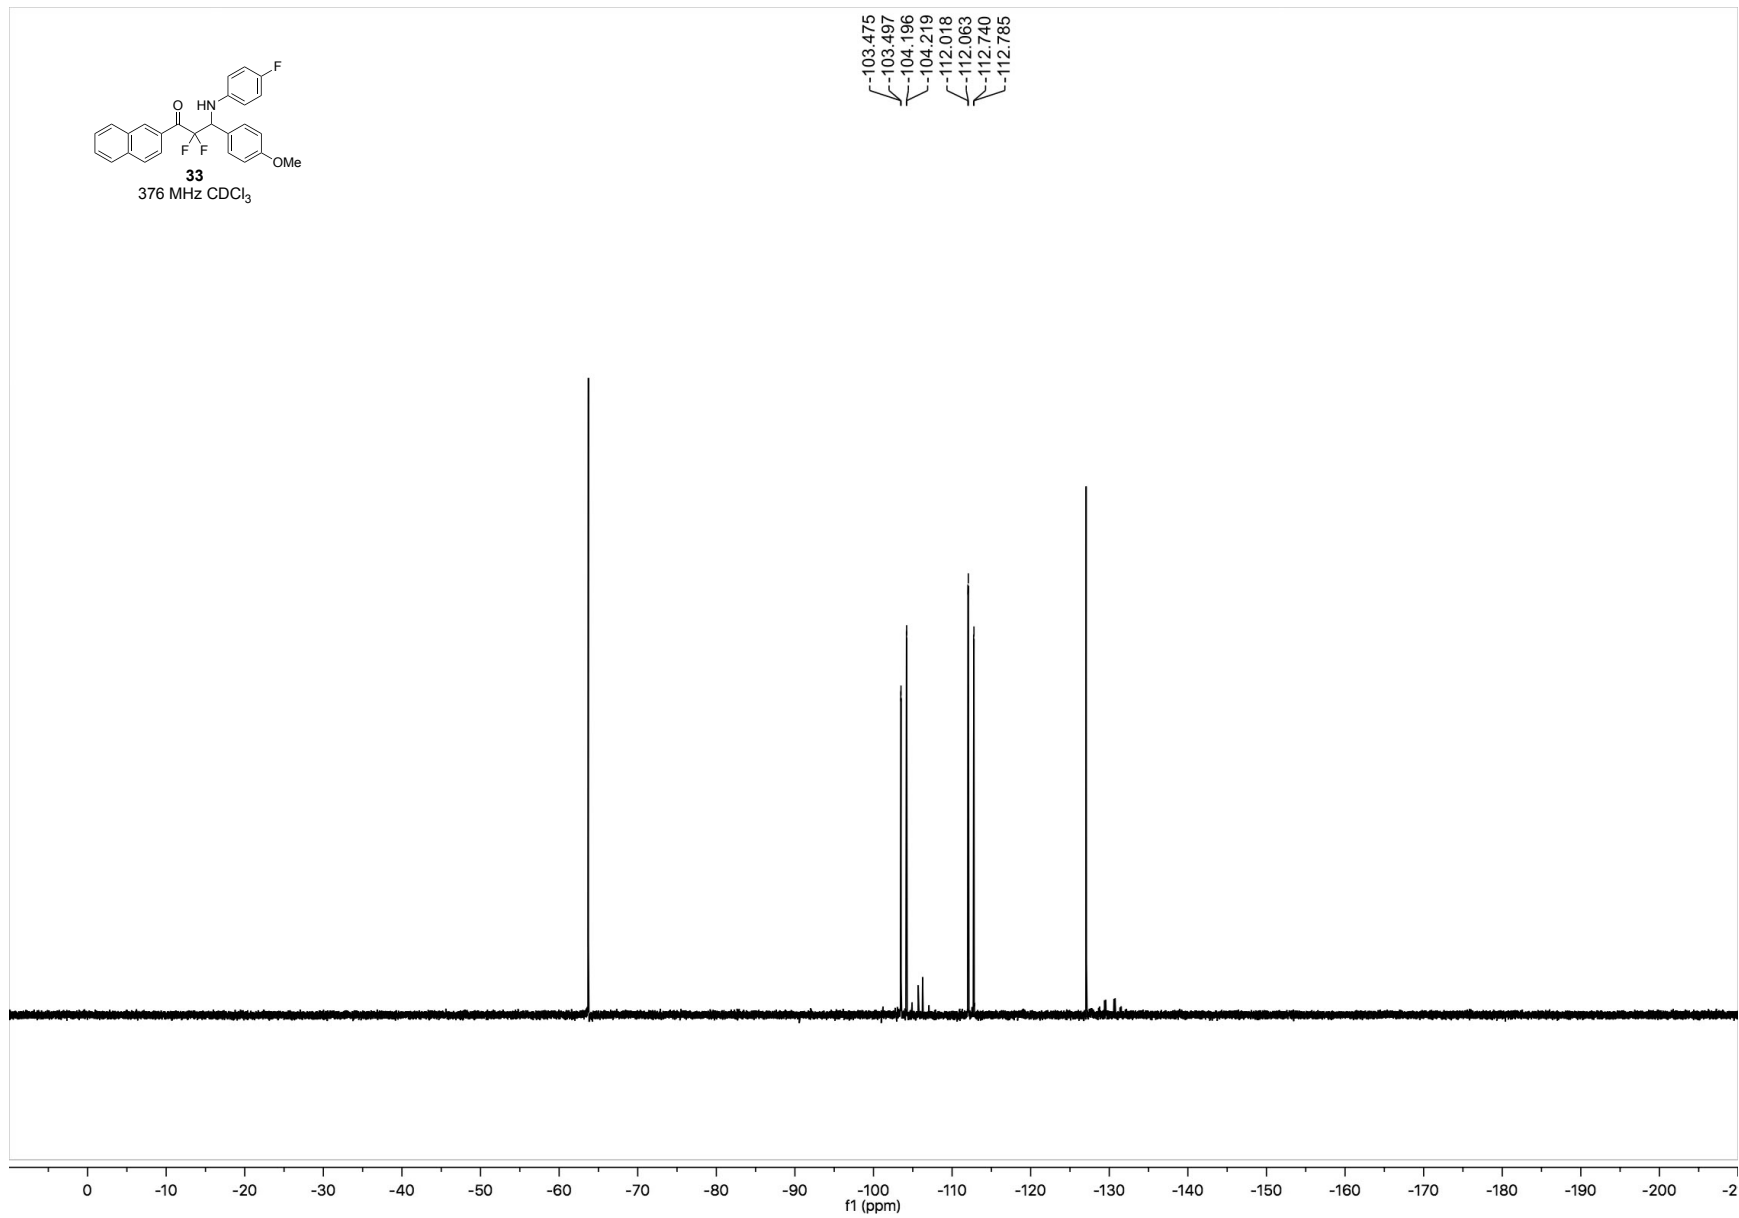

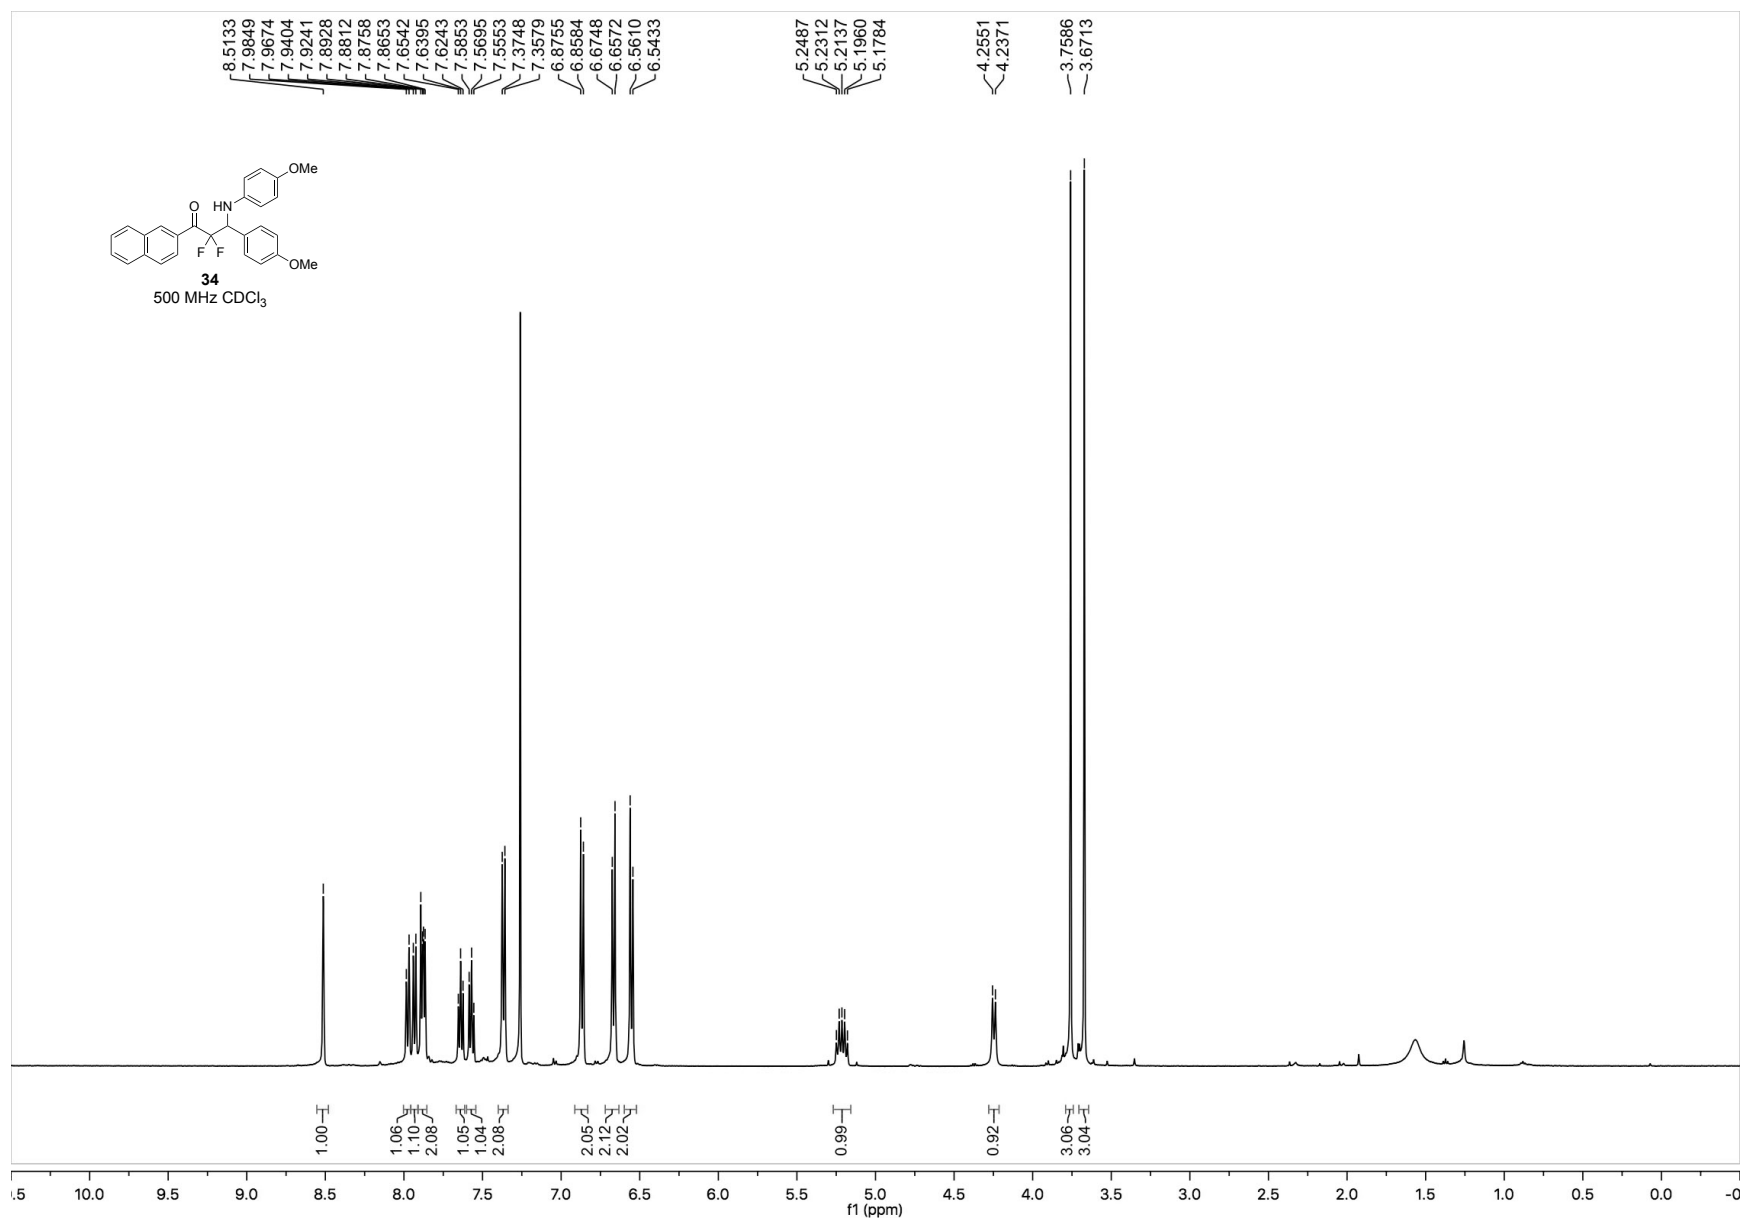

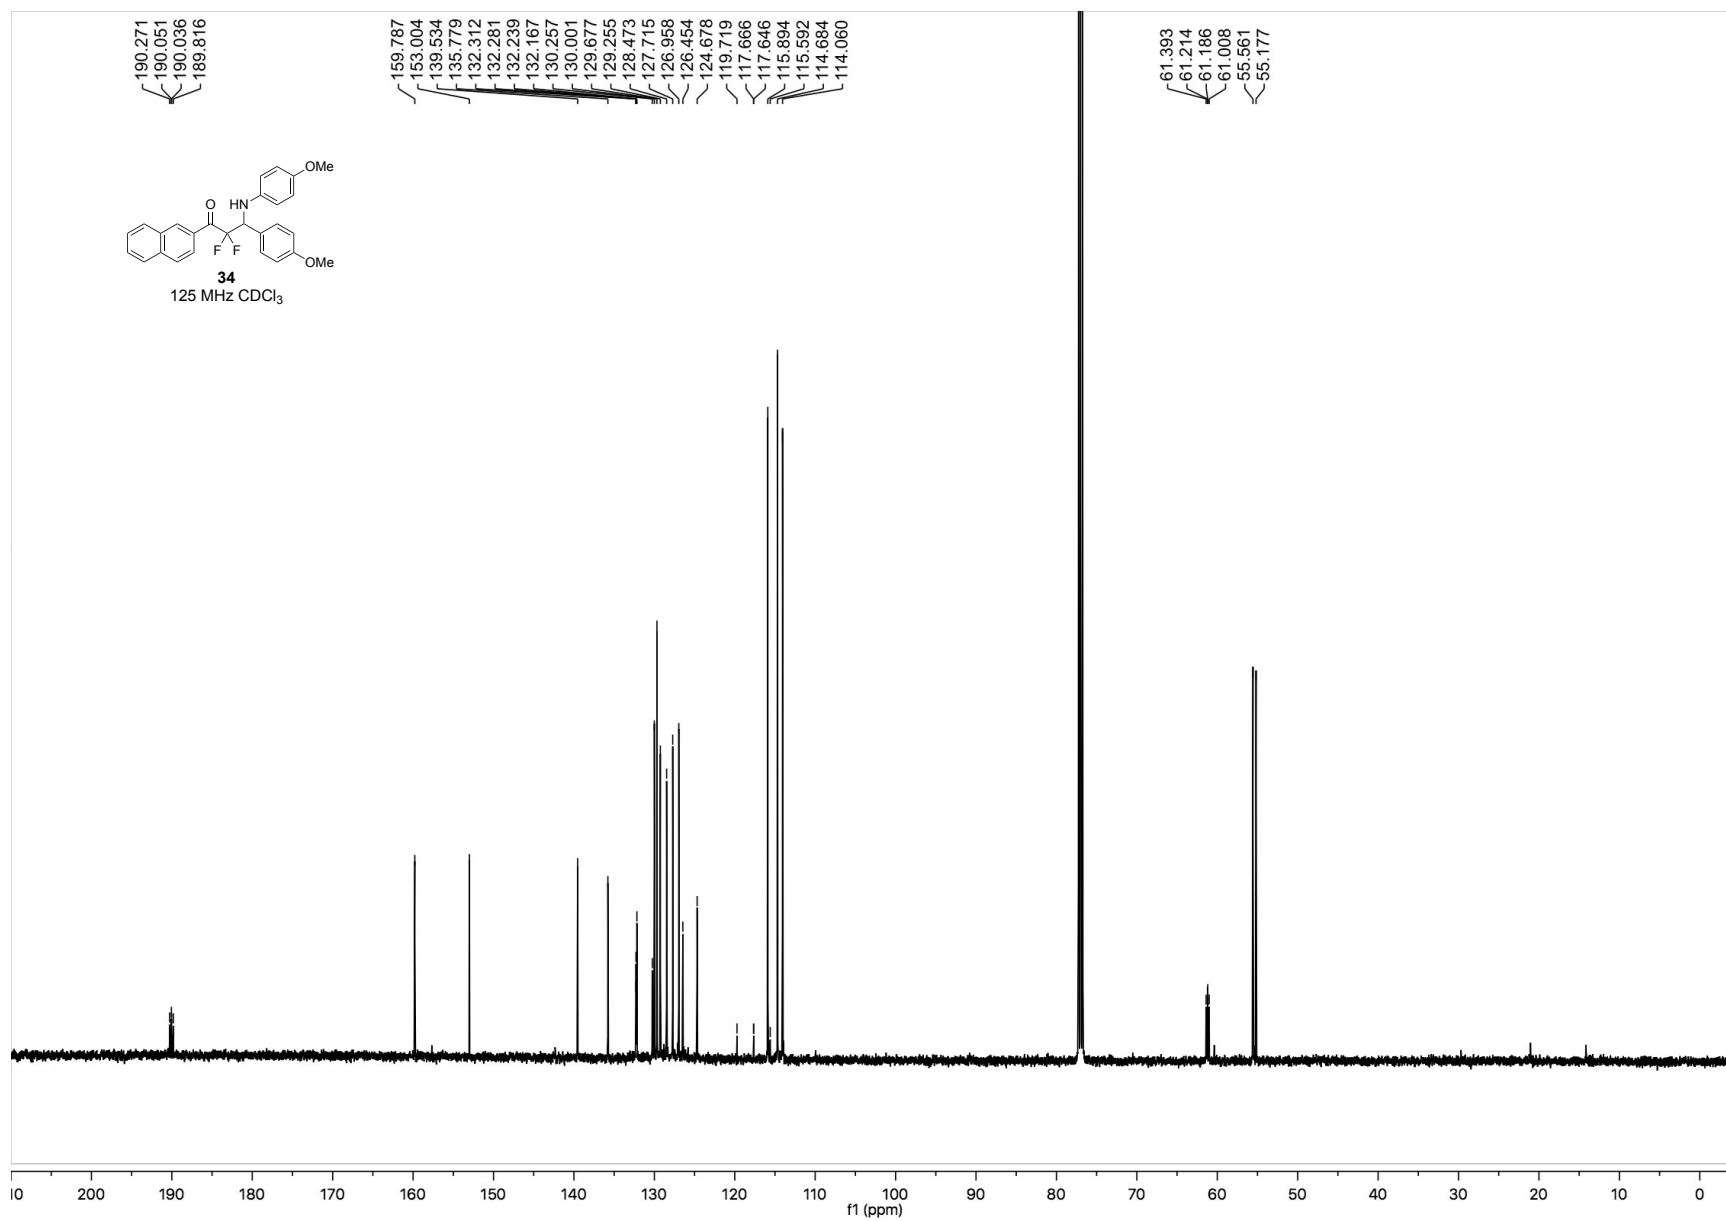



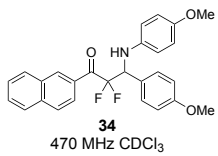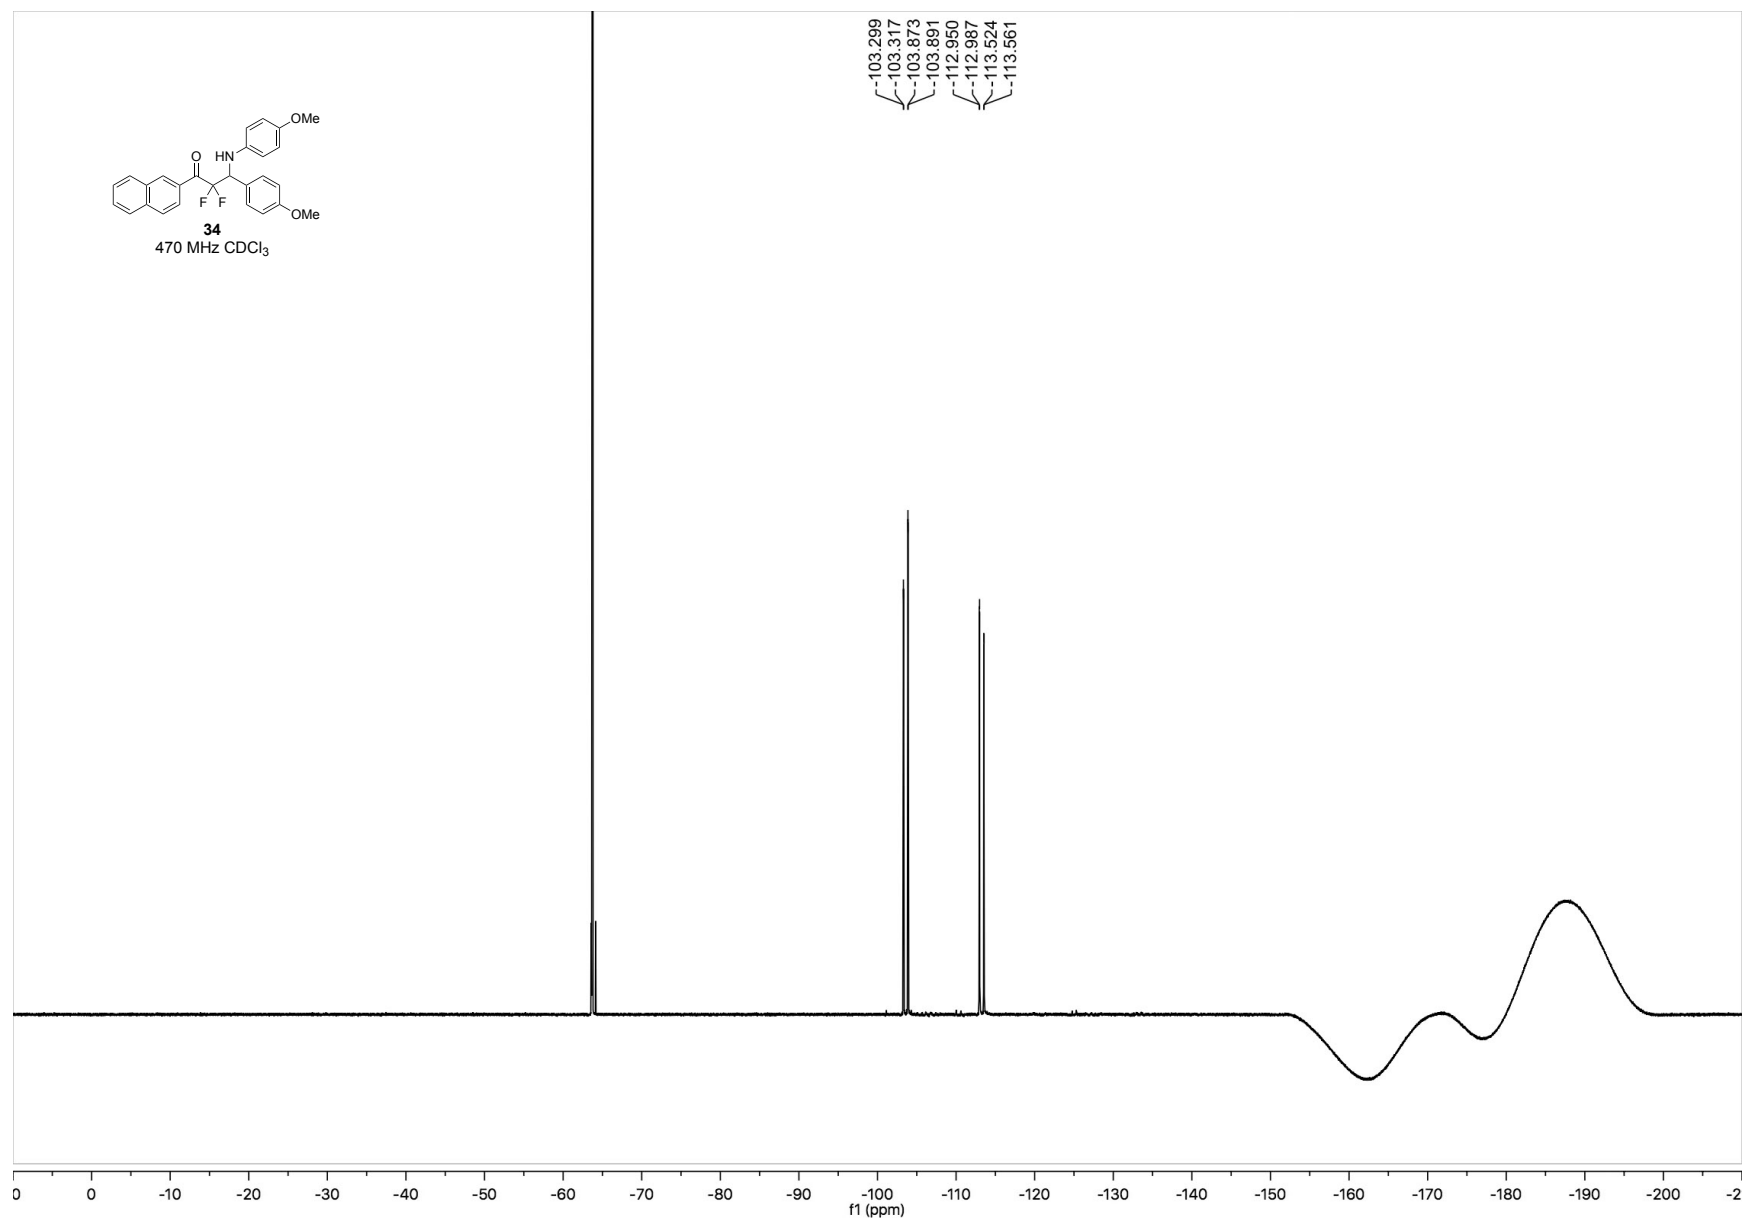

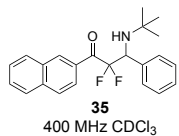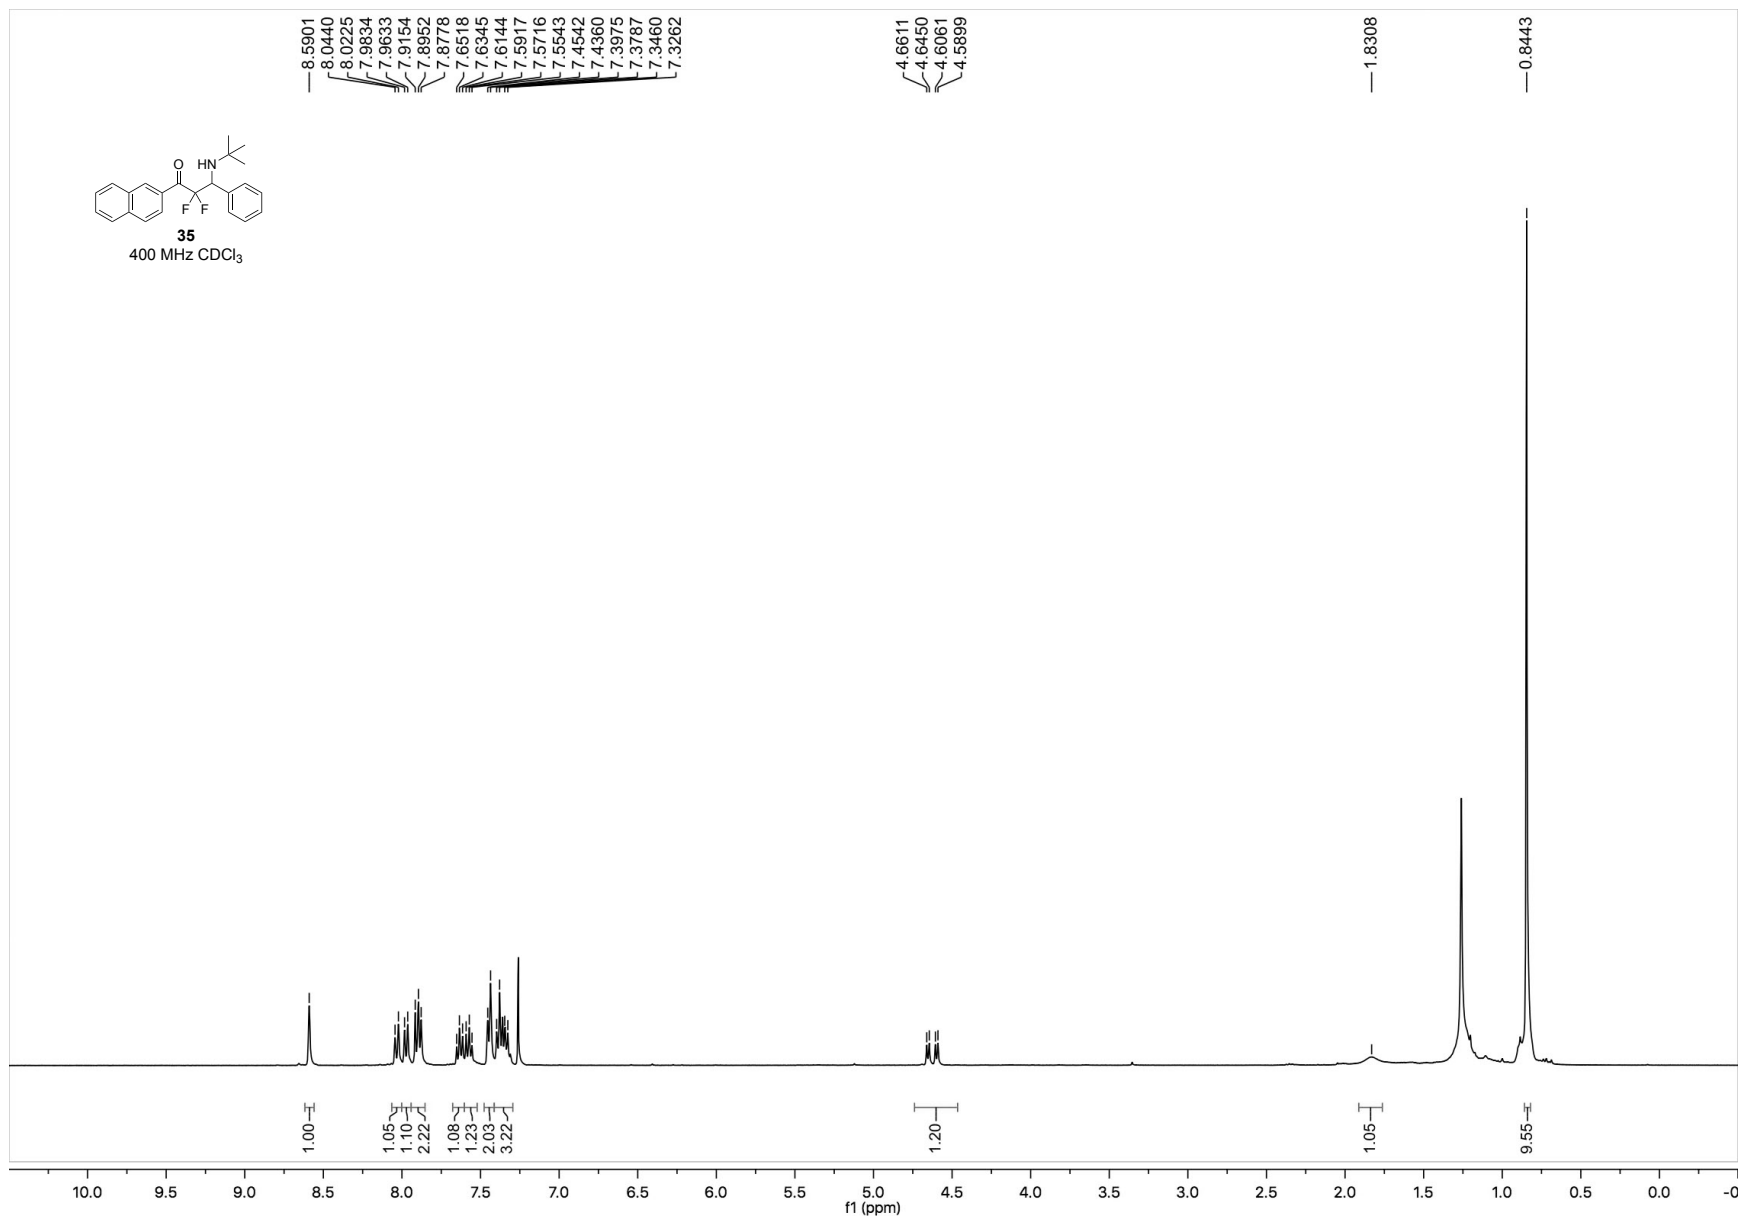

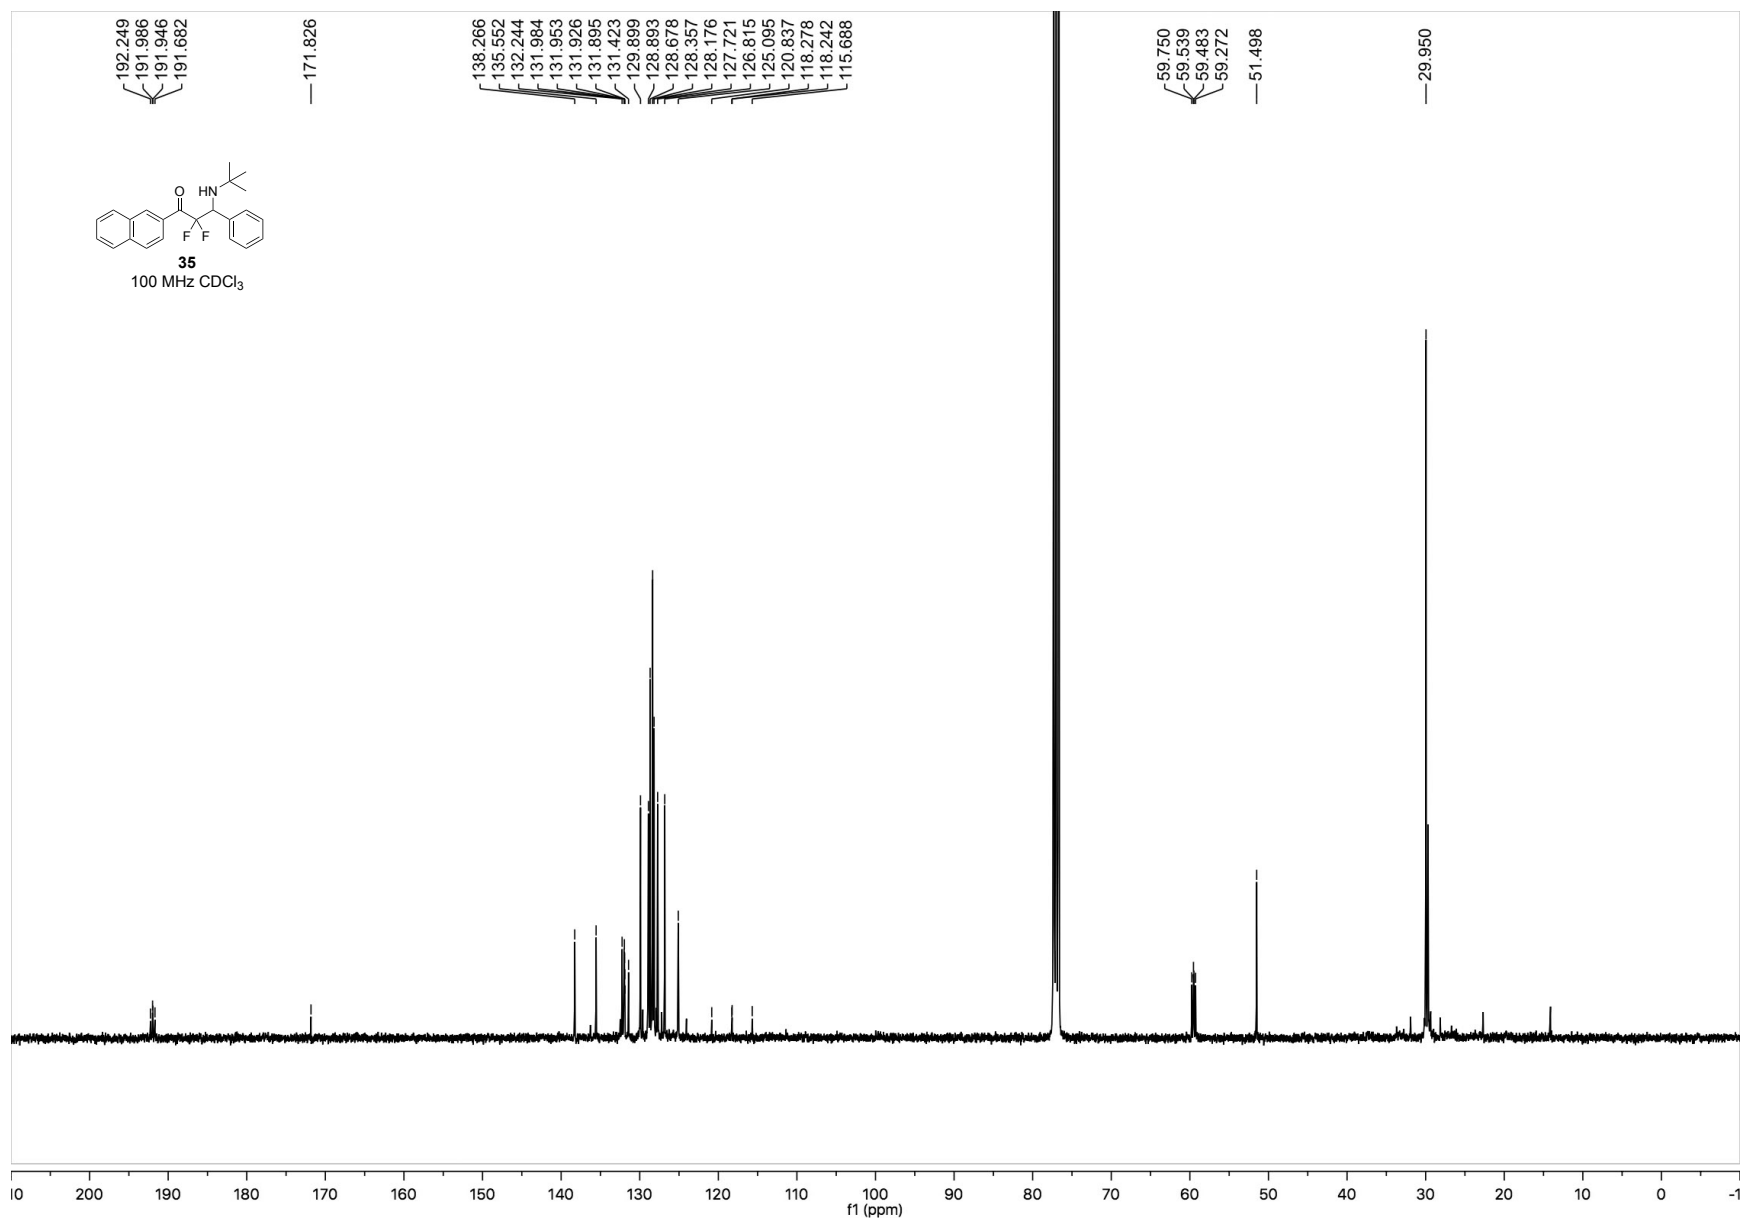

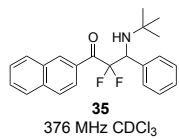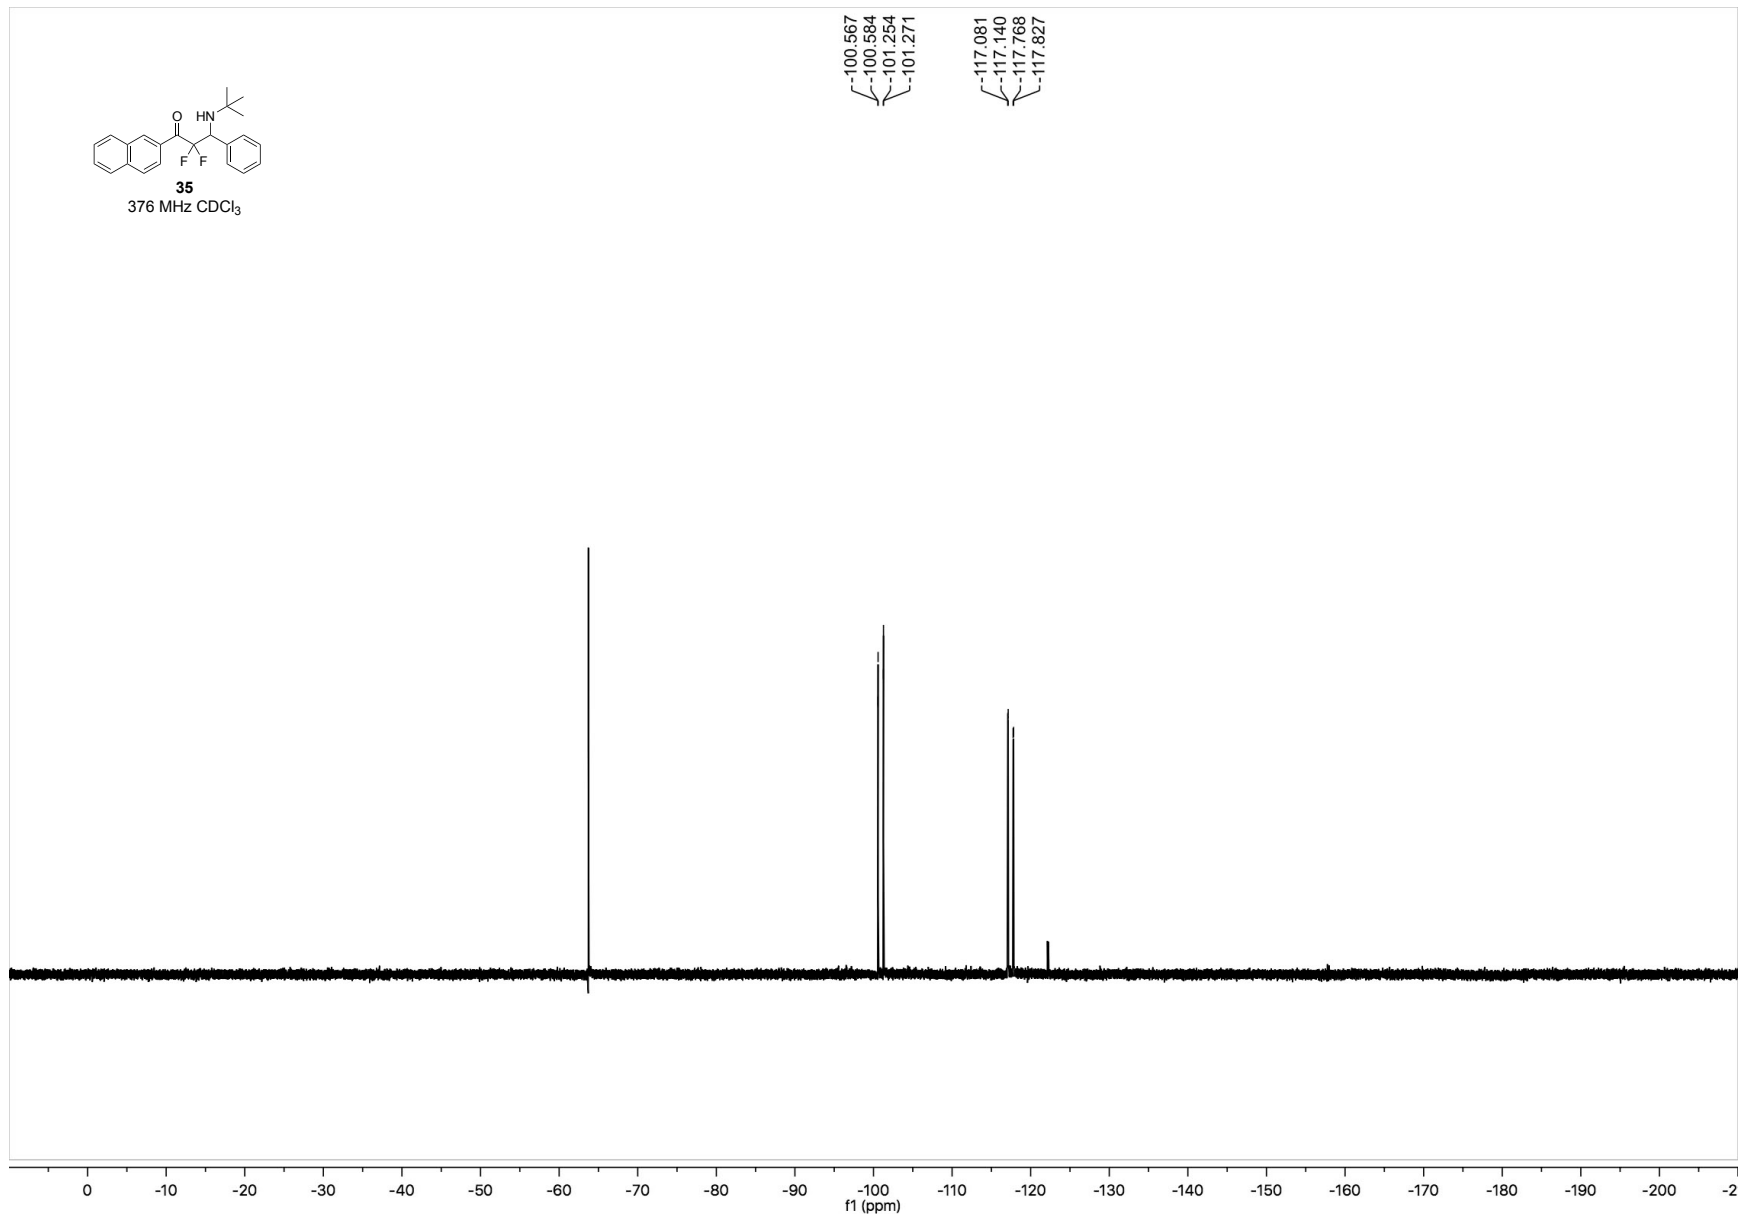

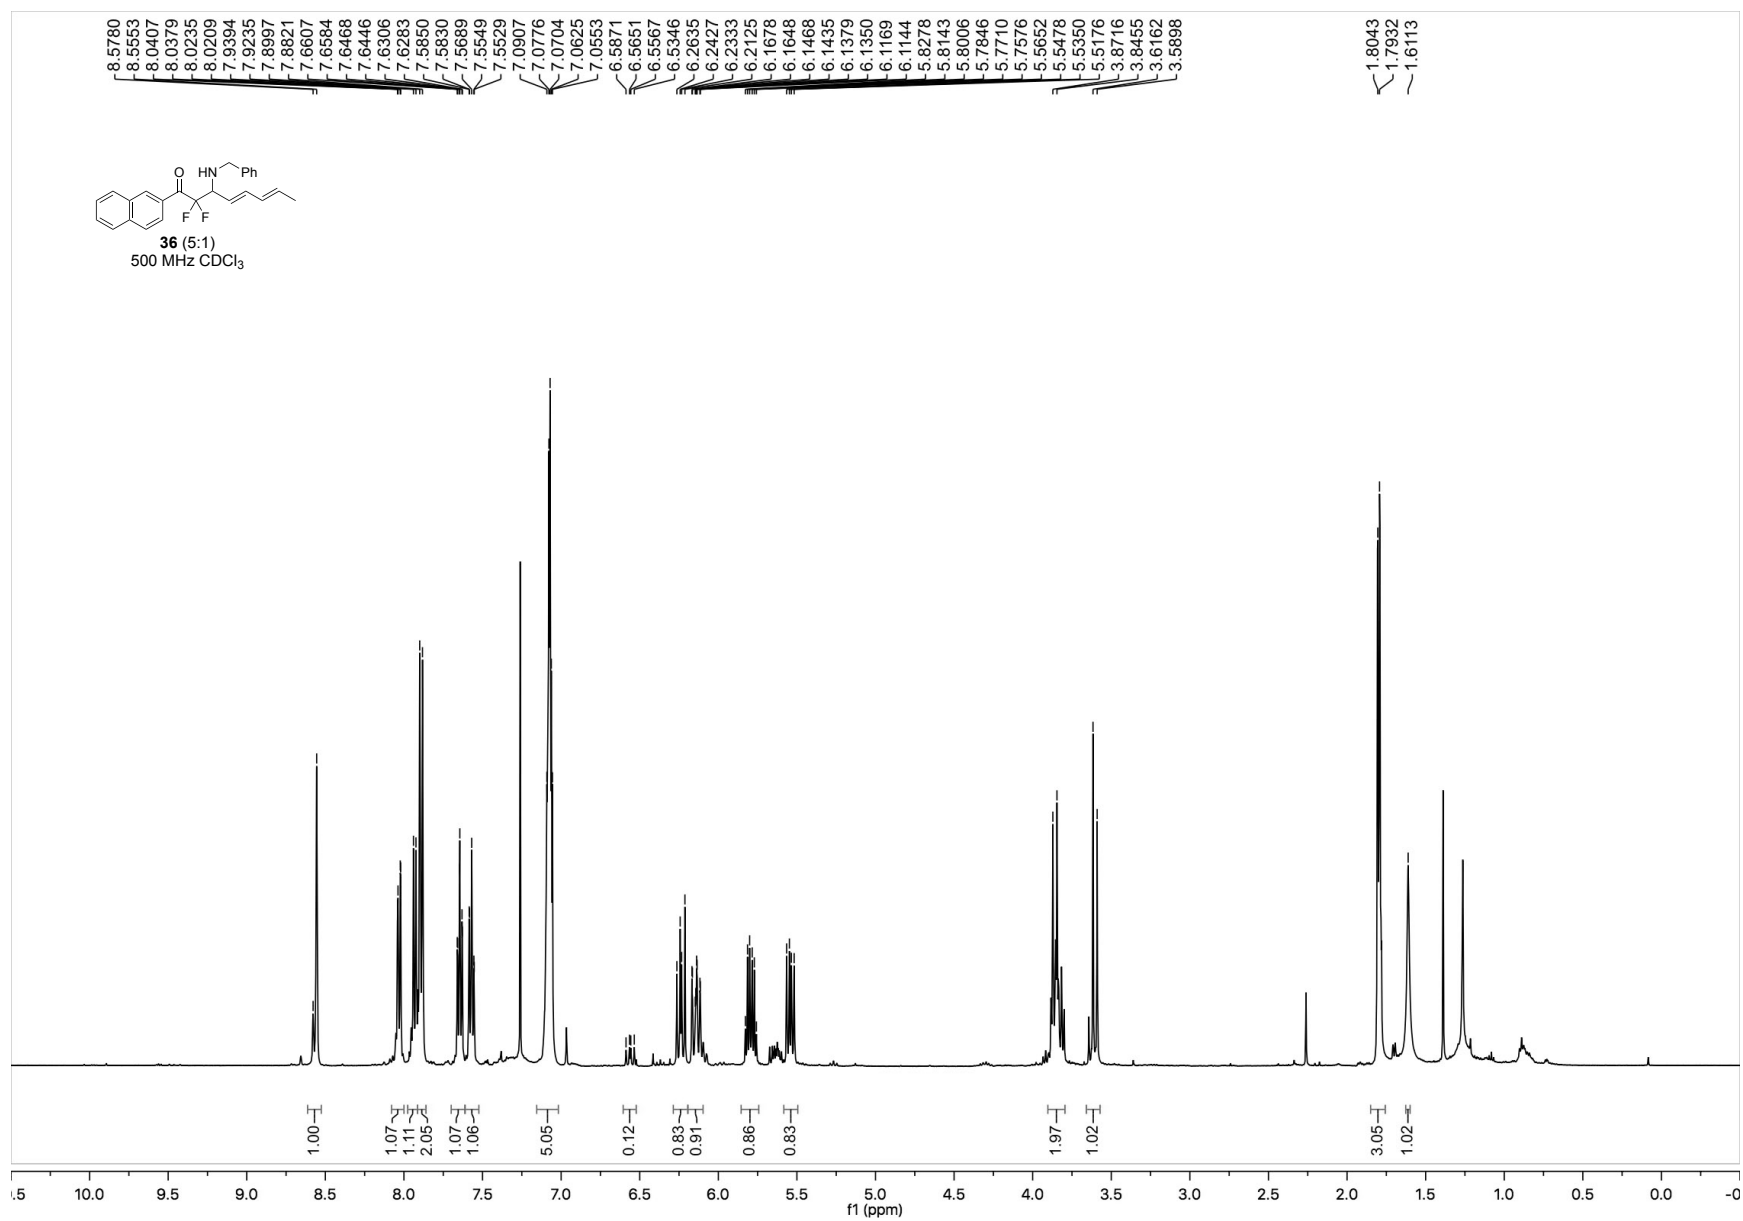

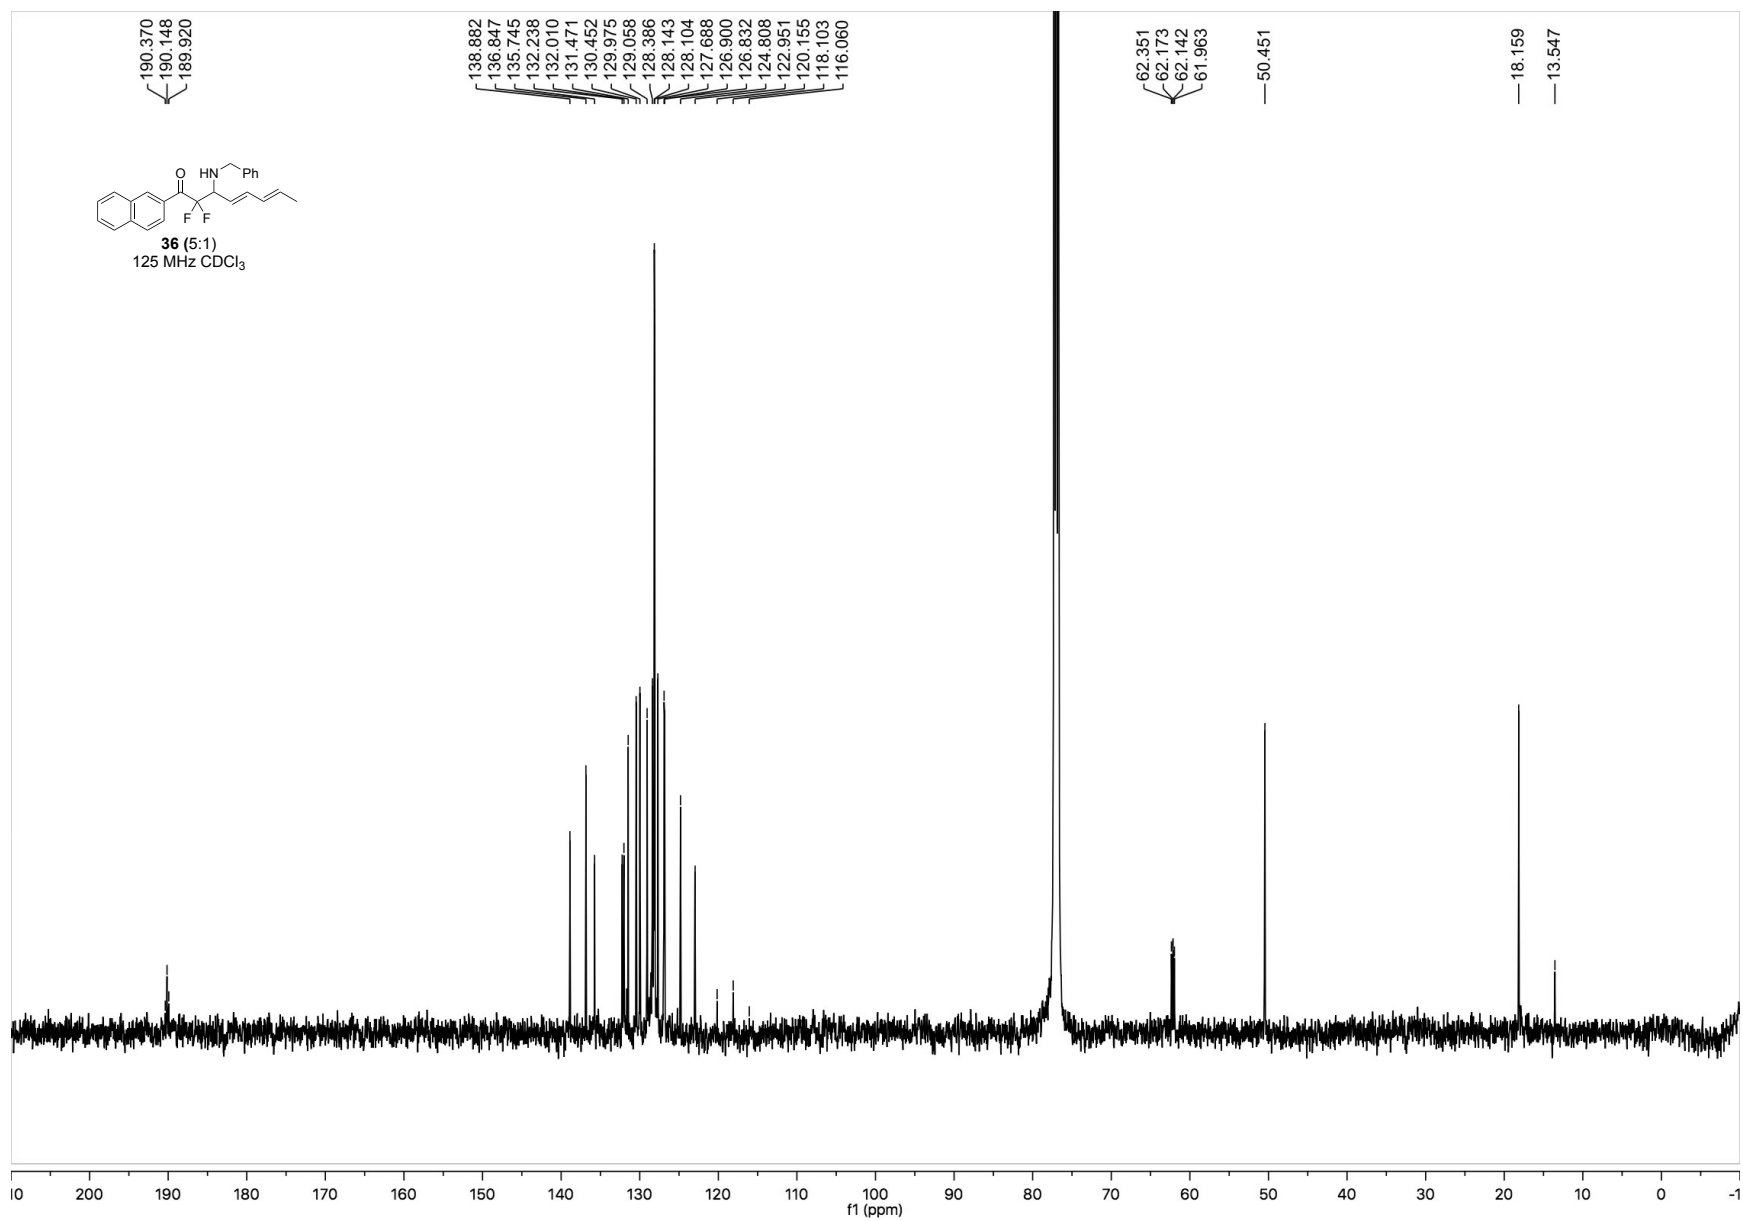

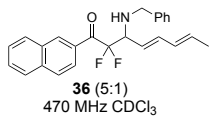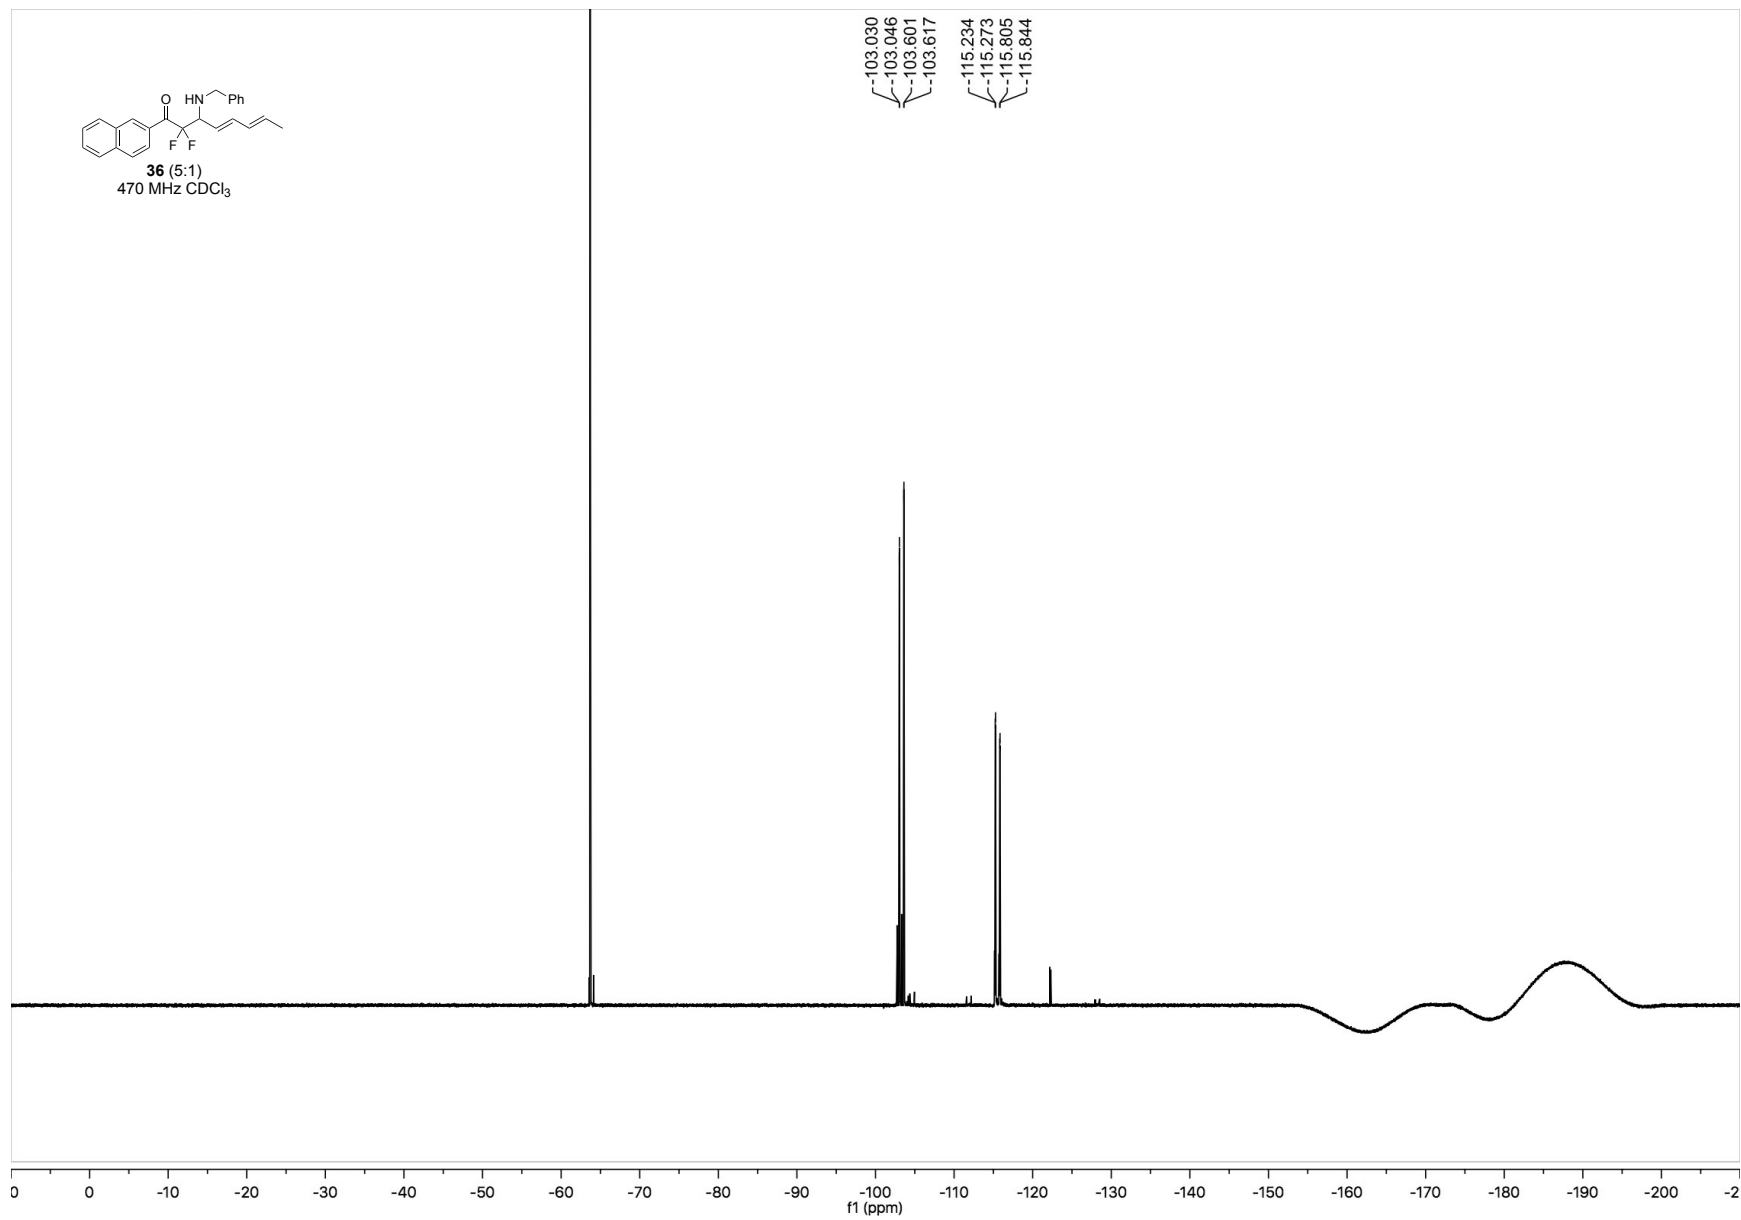

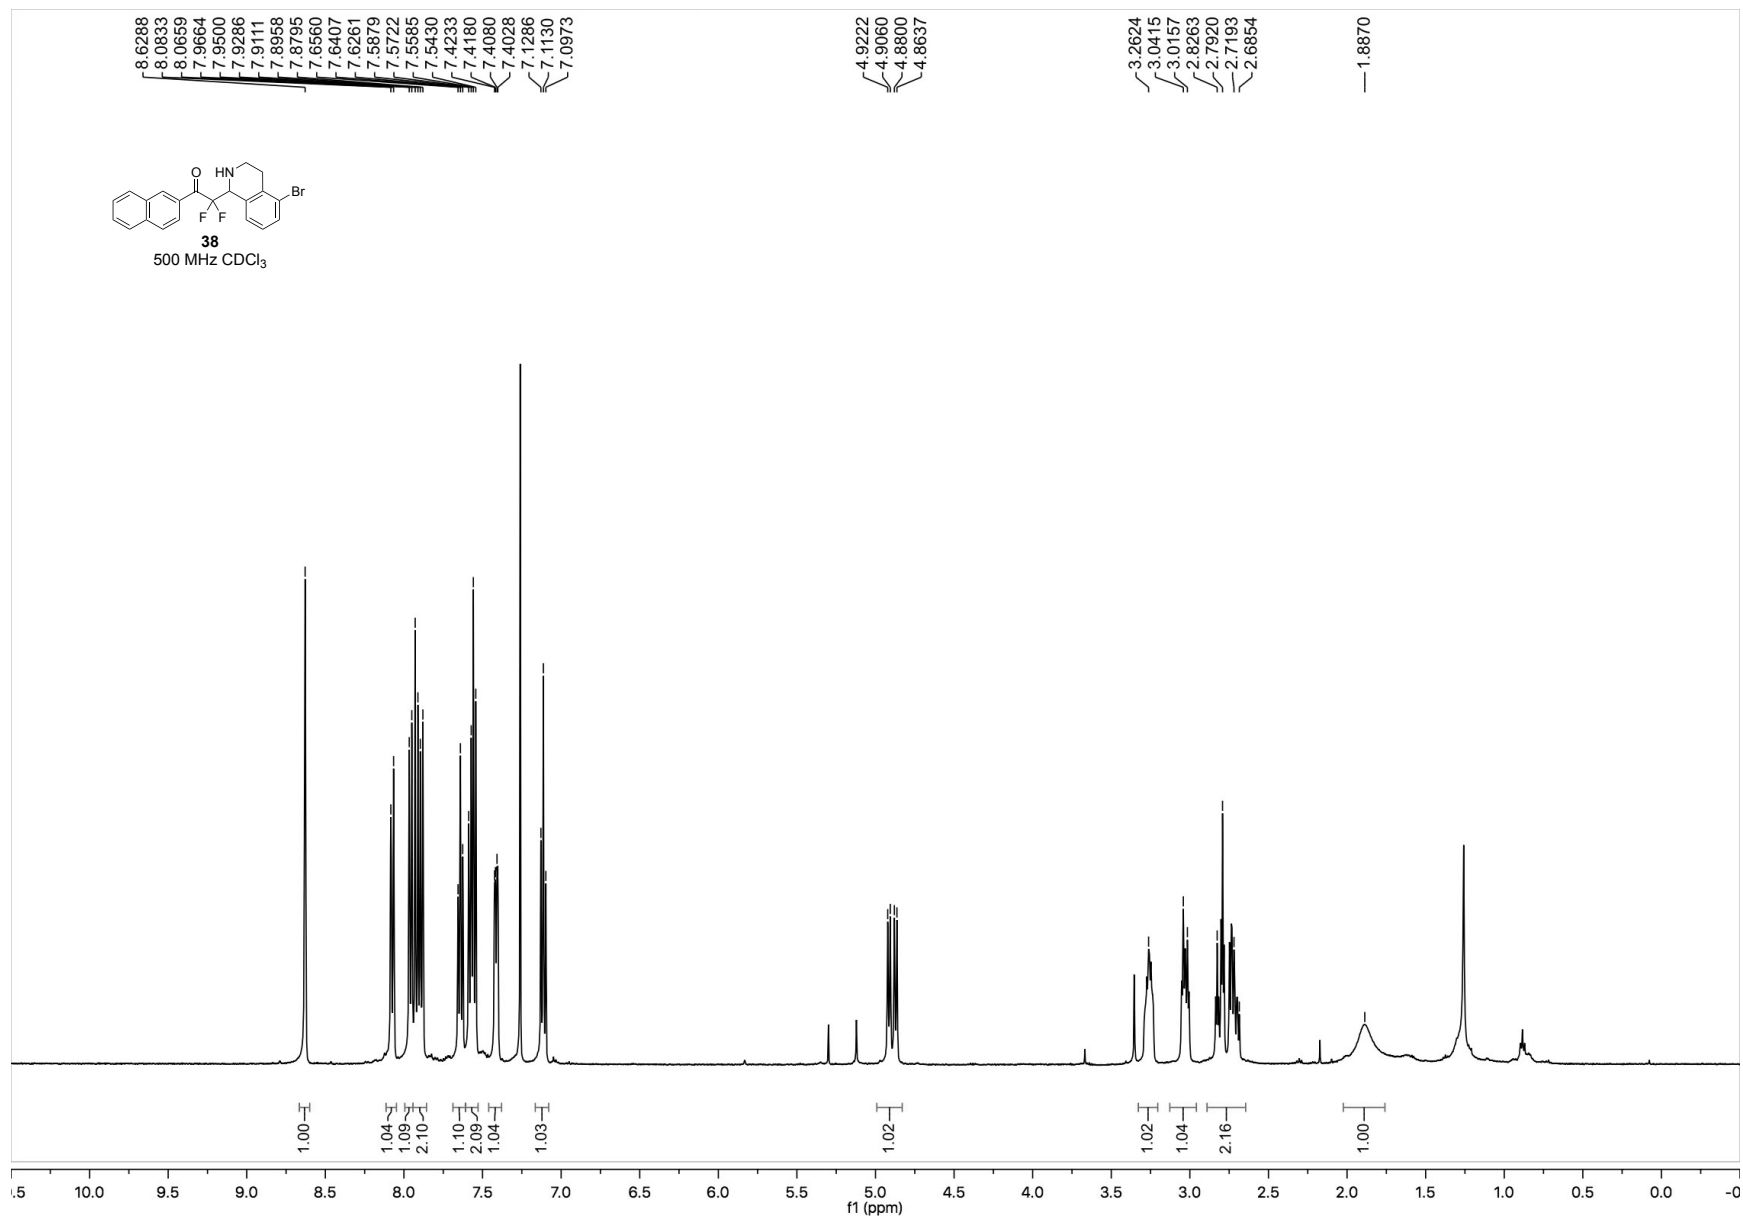



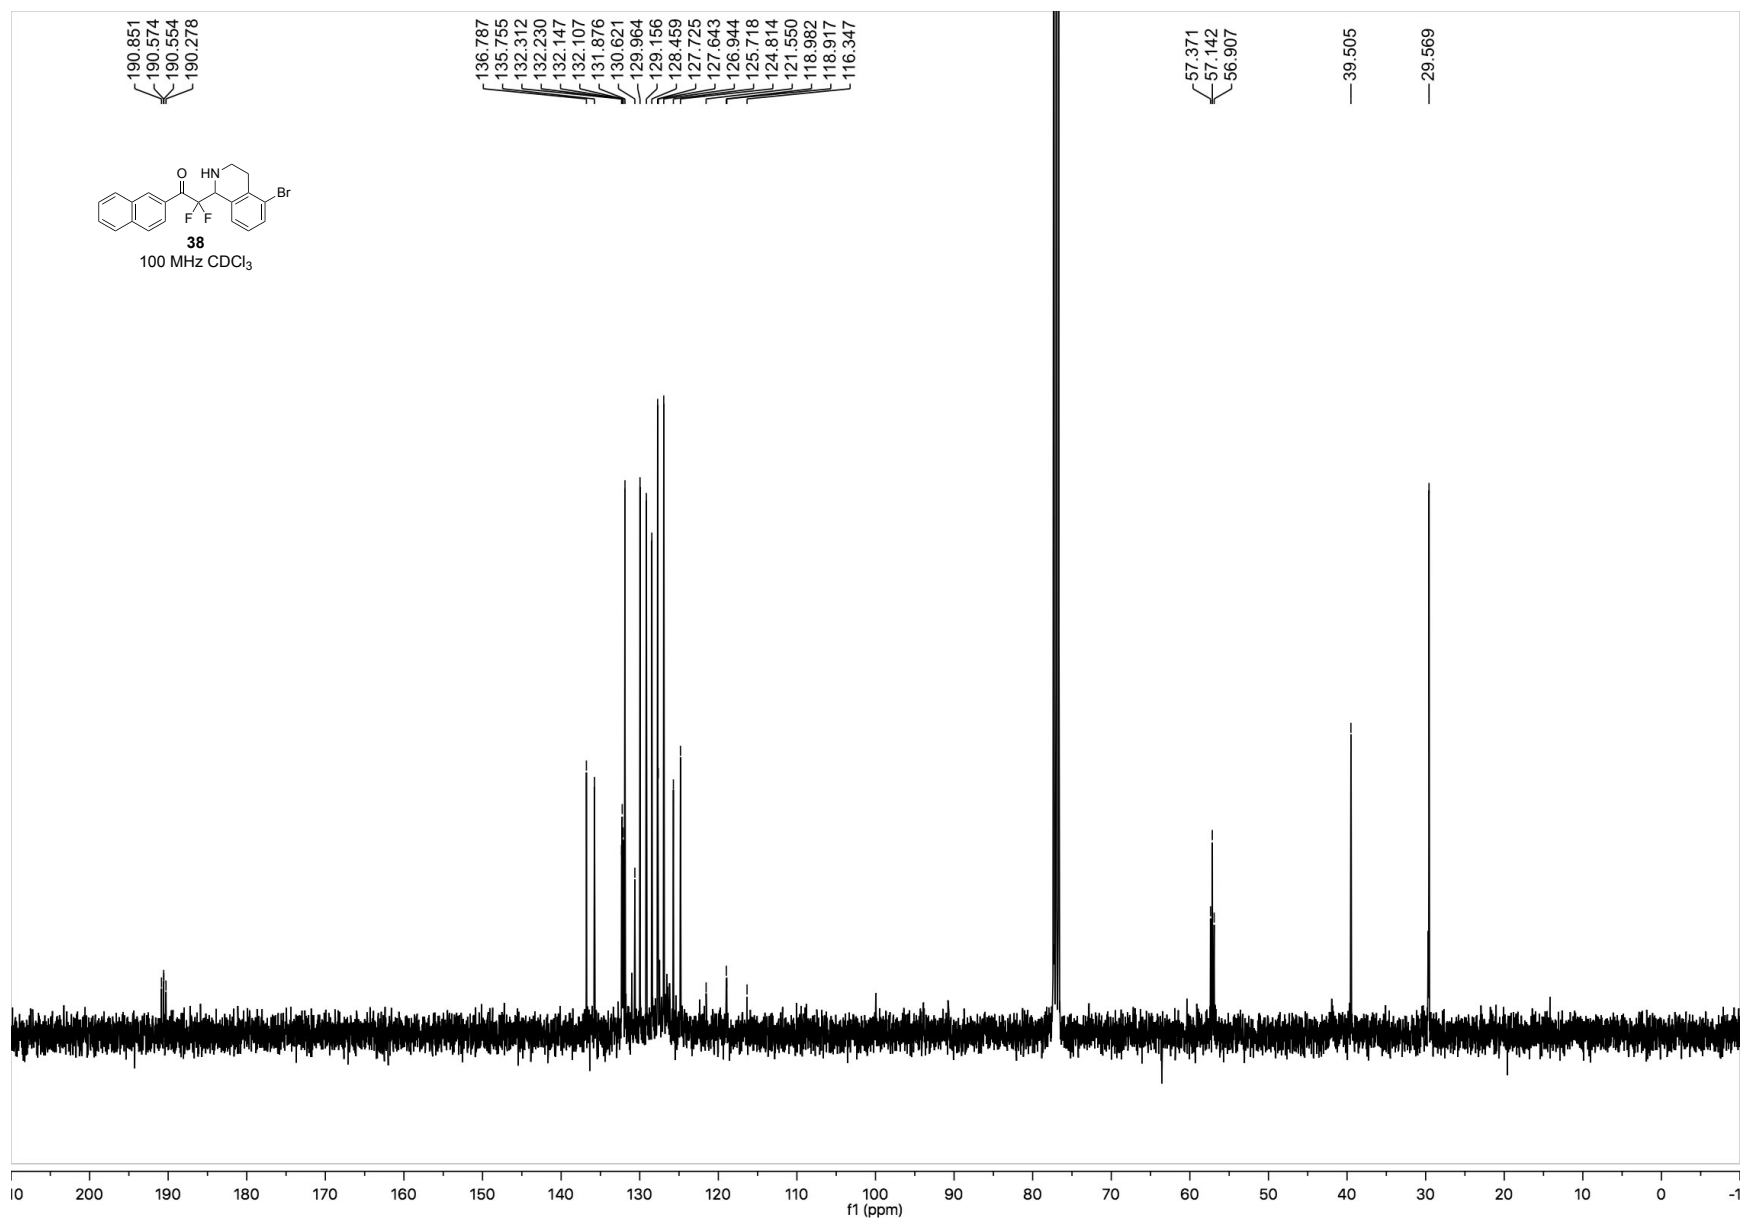

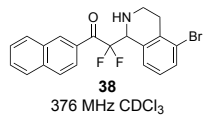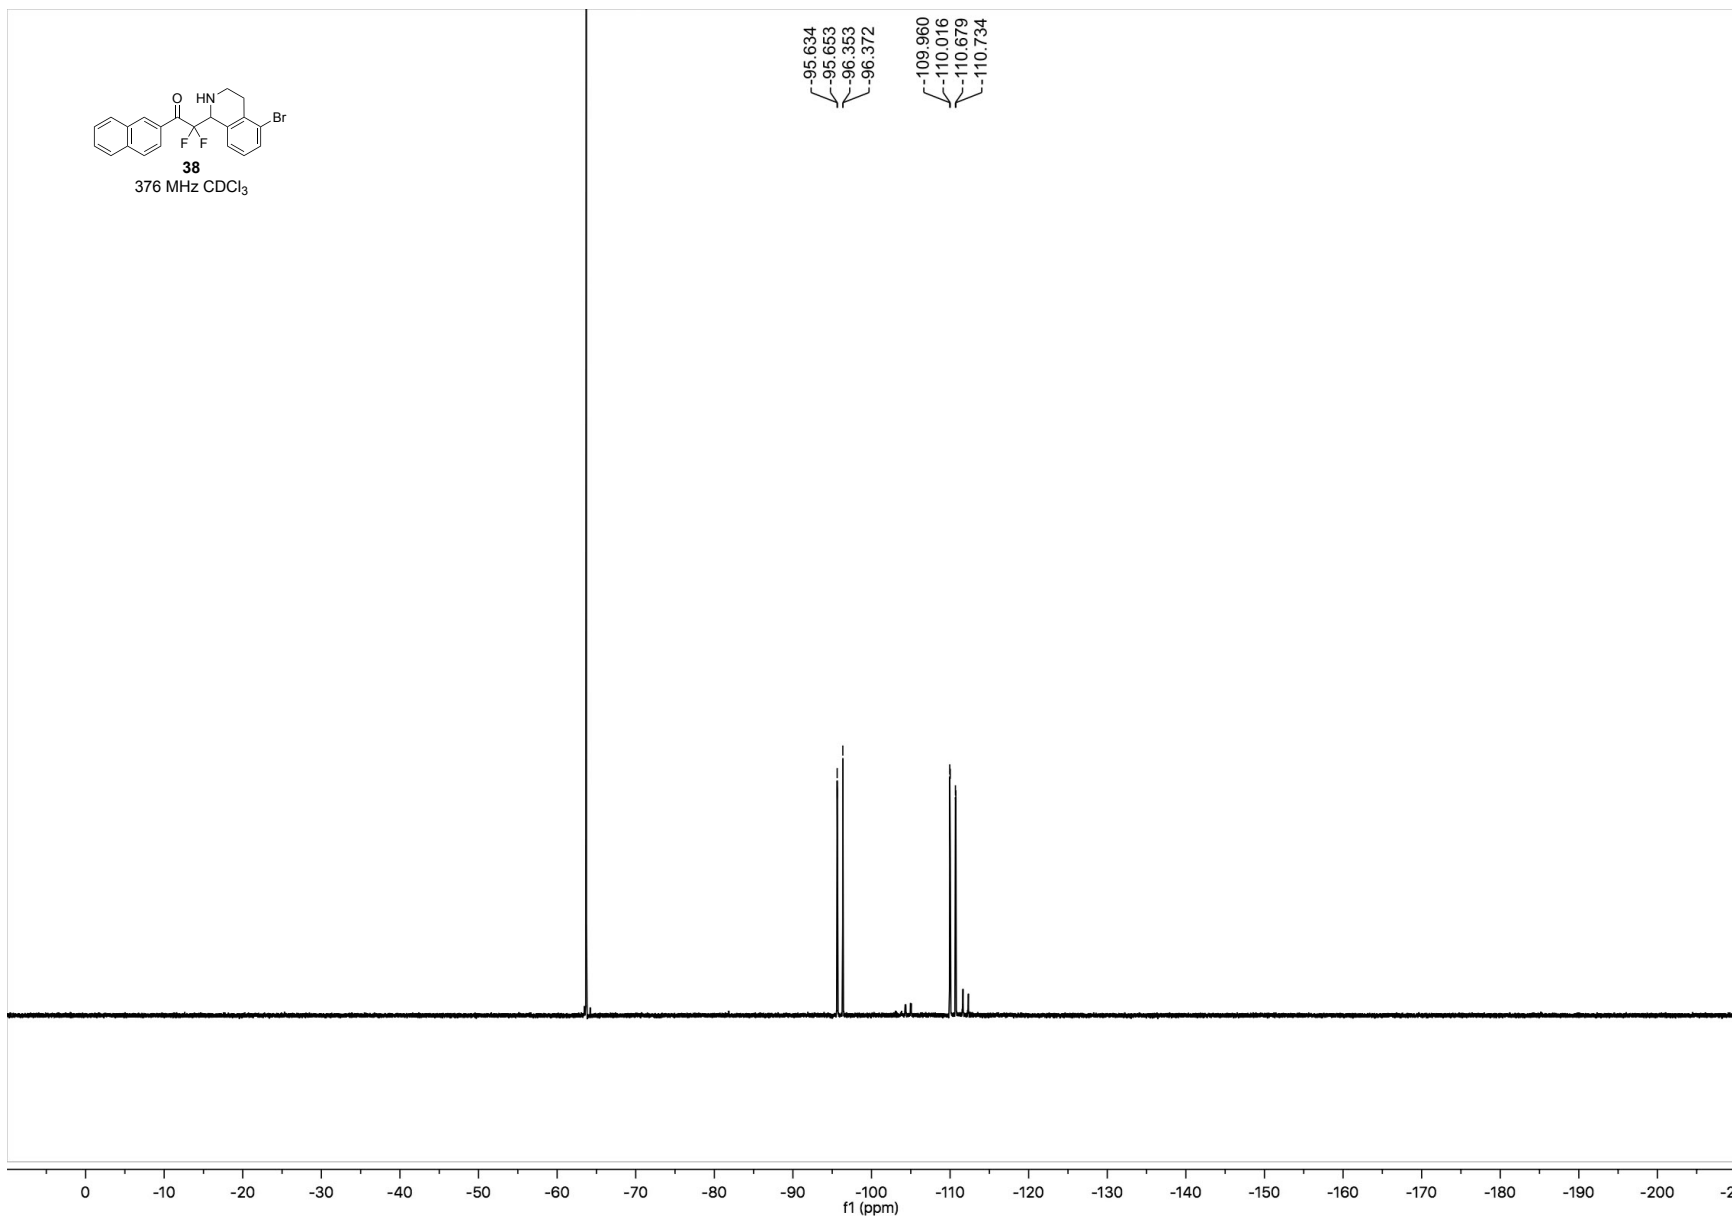

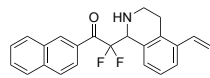

**39**  
500 MHz CDCl<sub>3</sub>

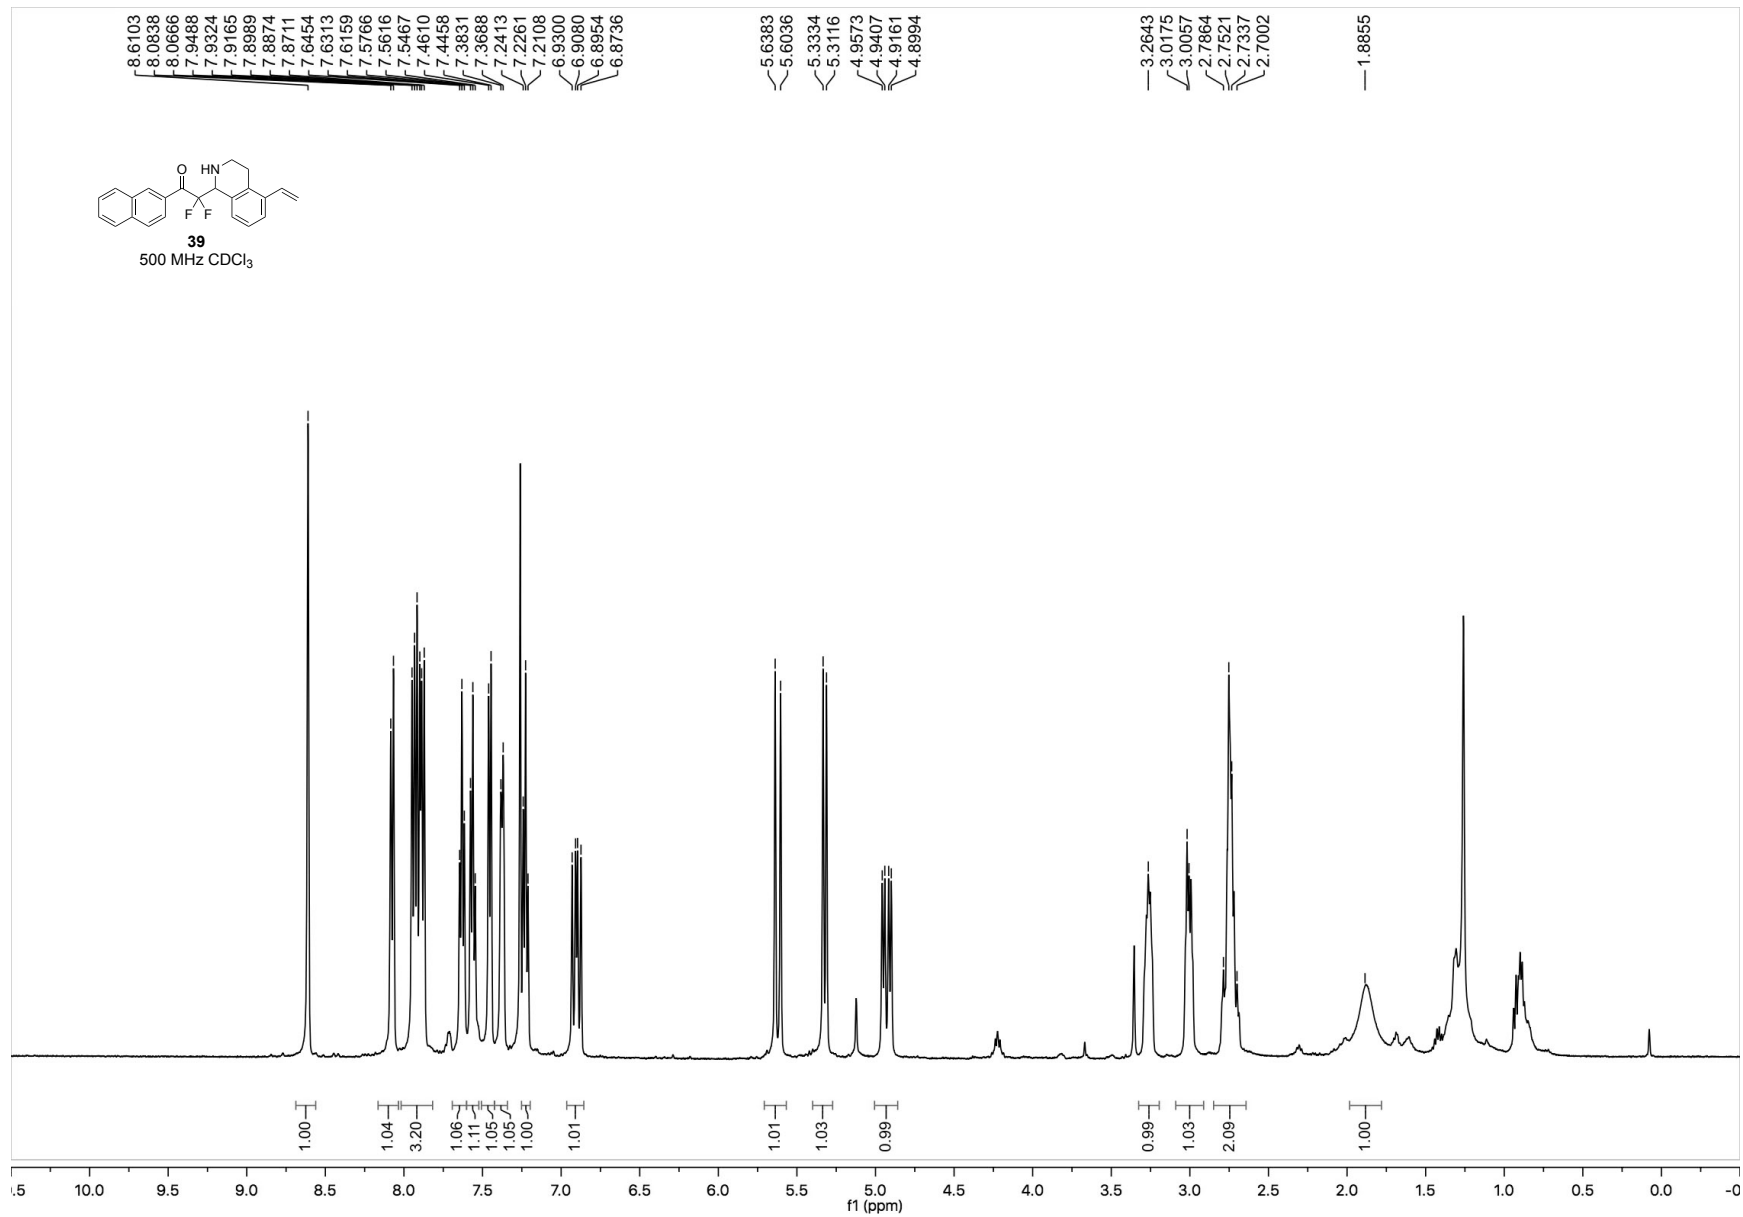

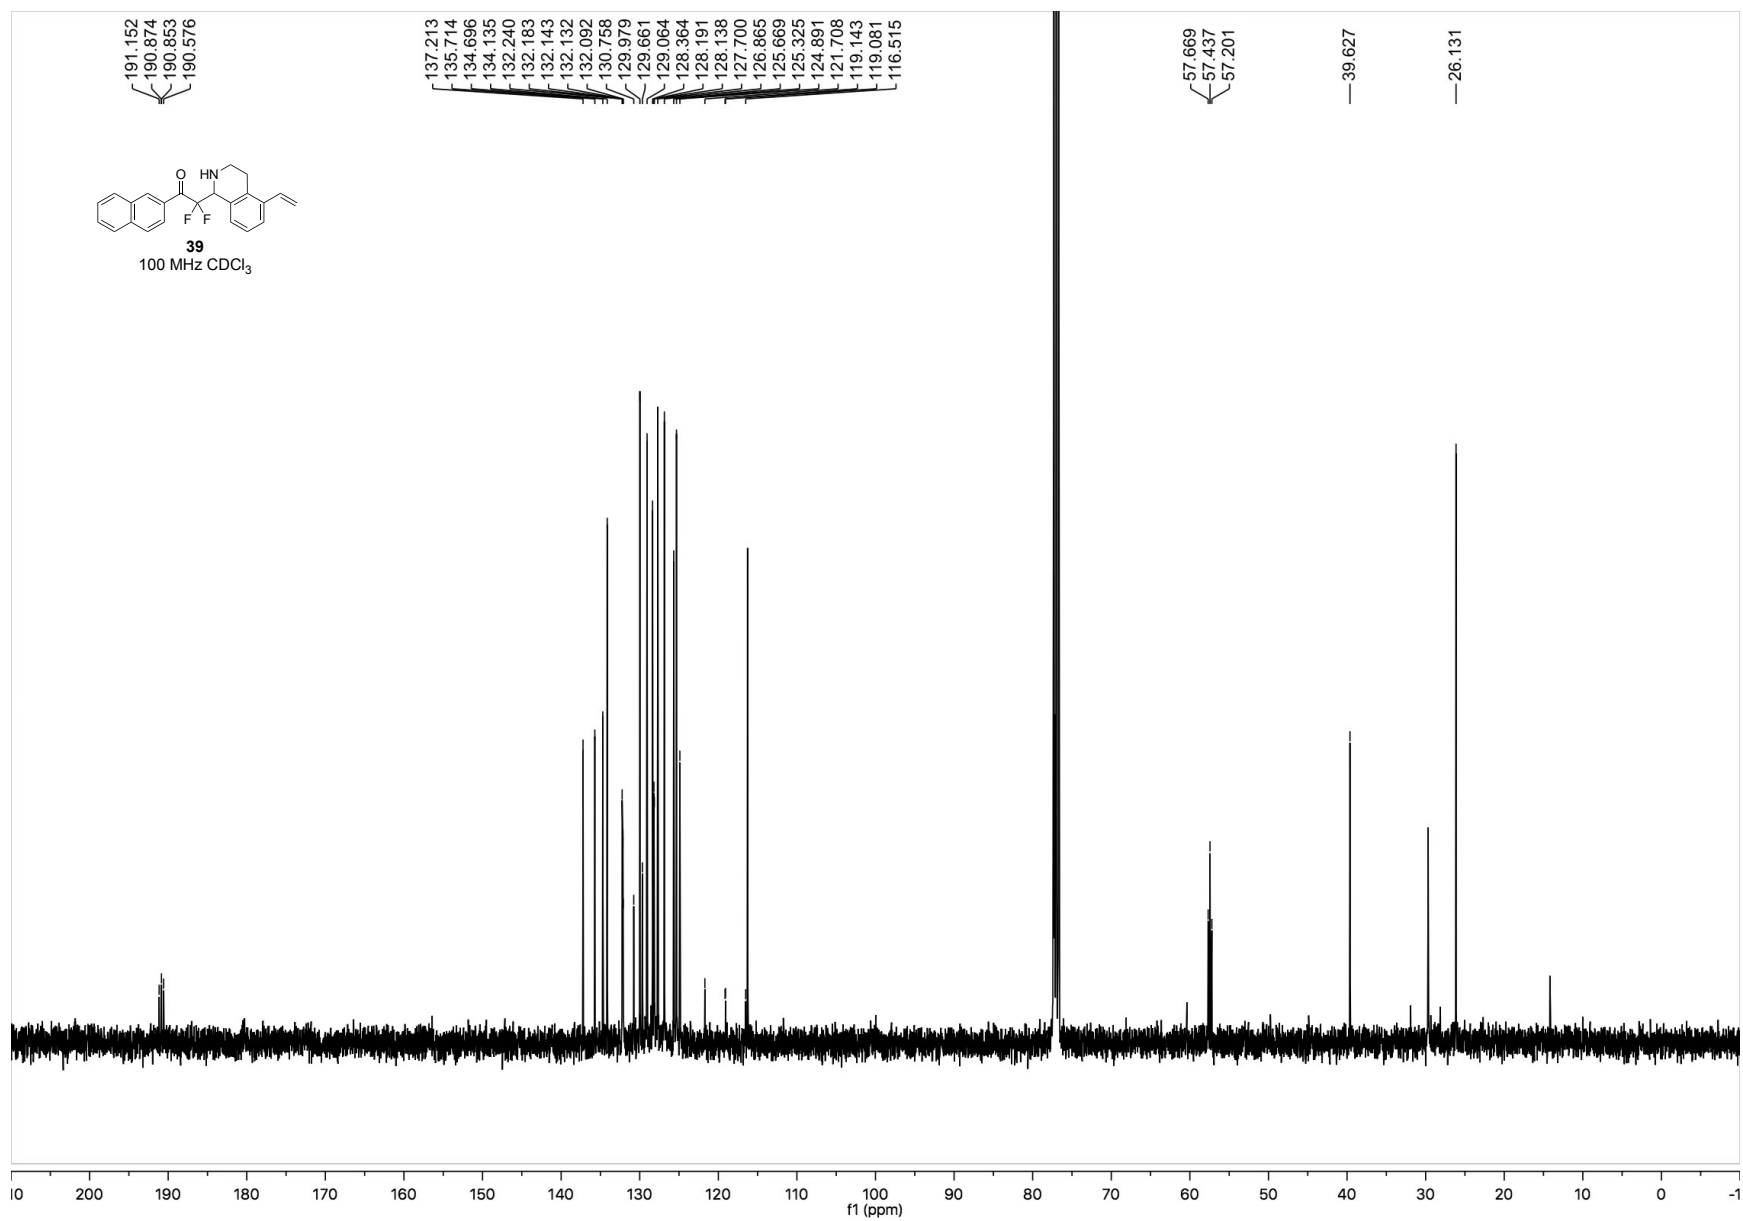

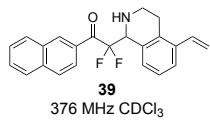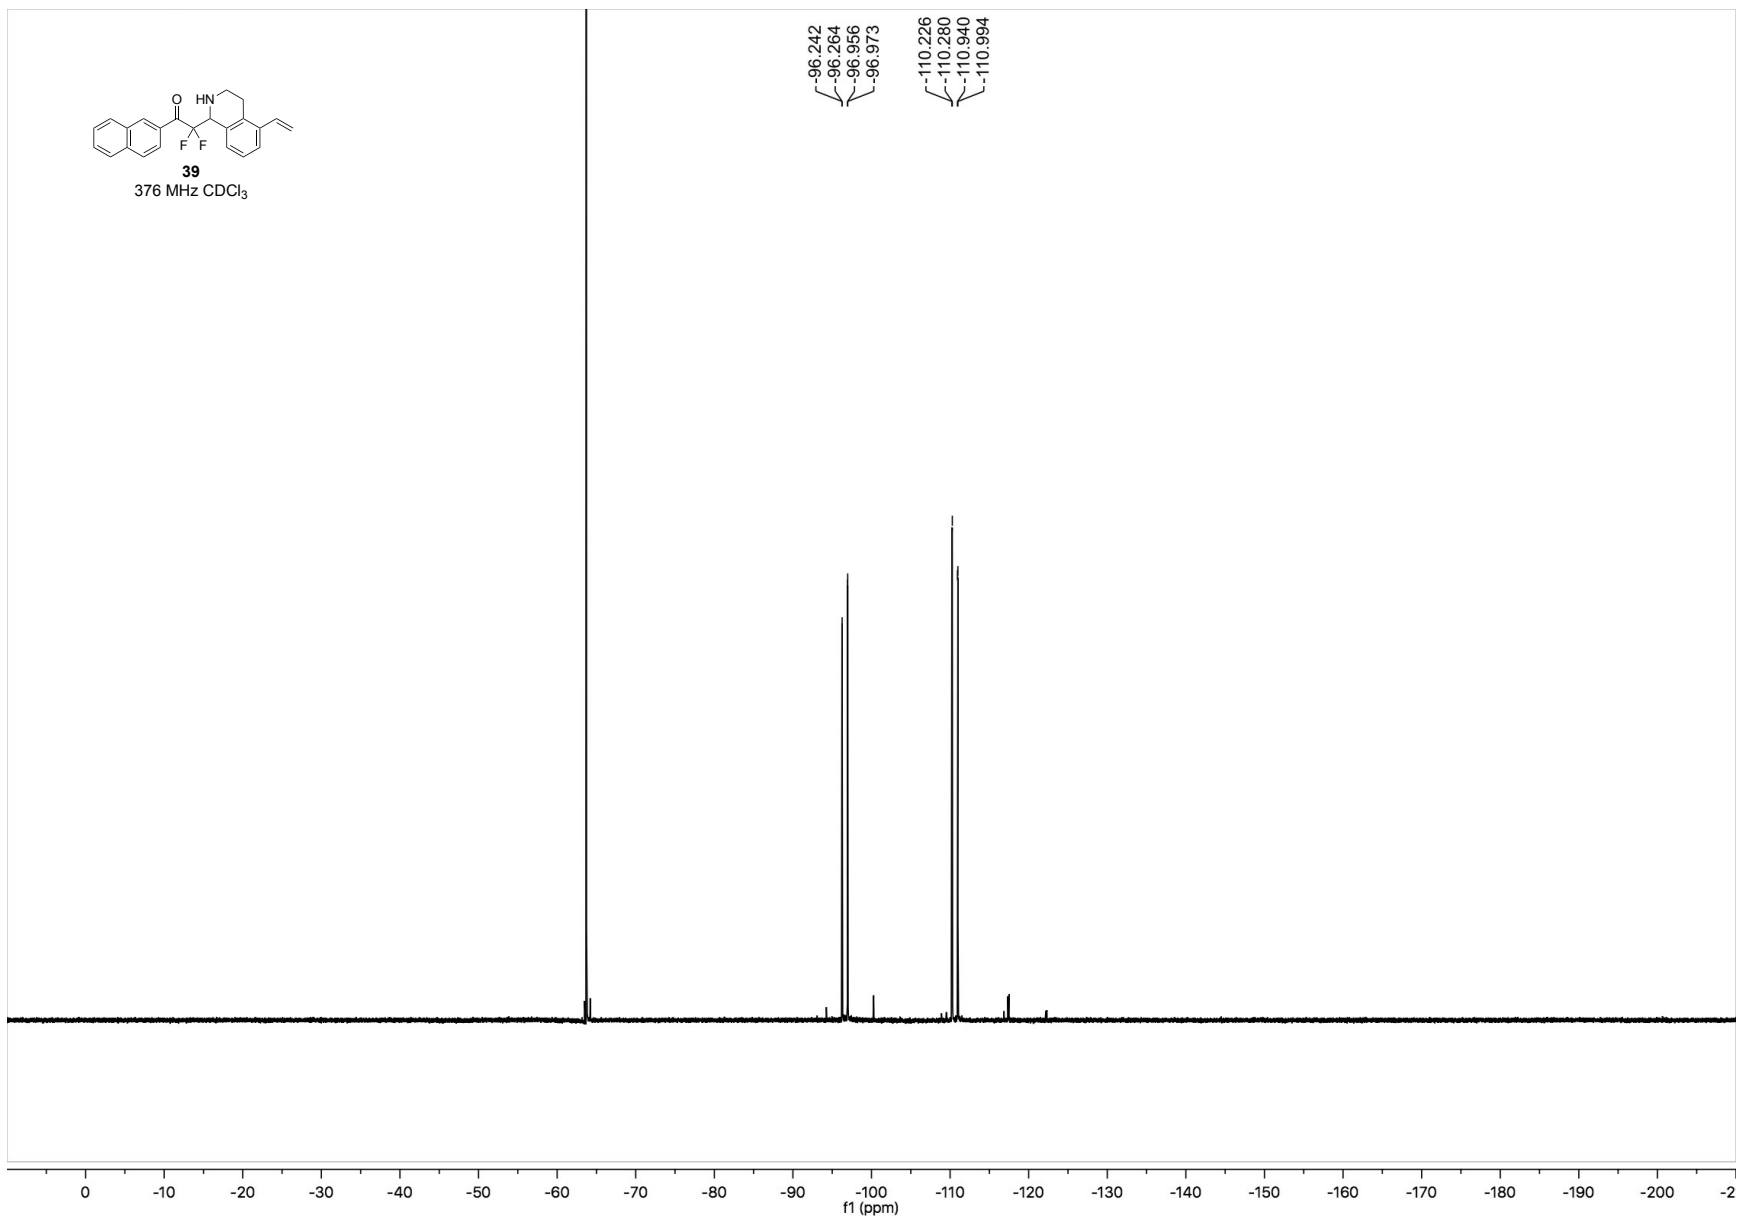

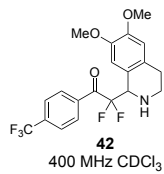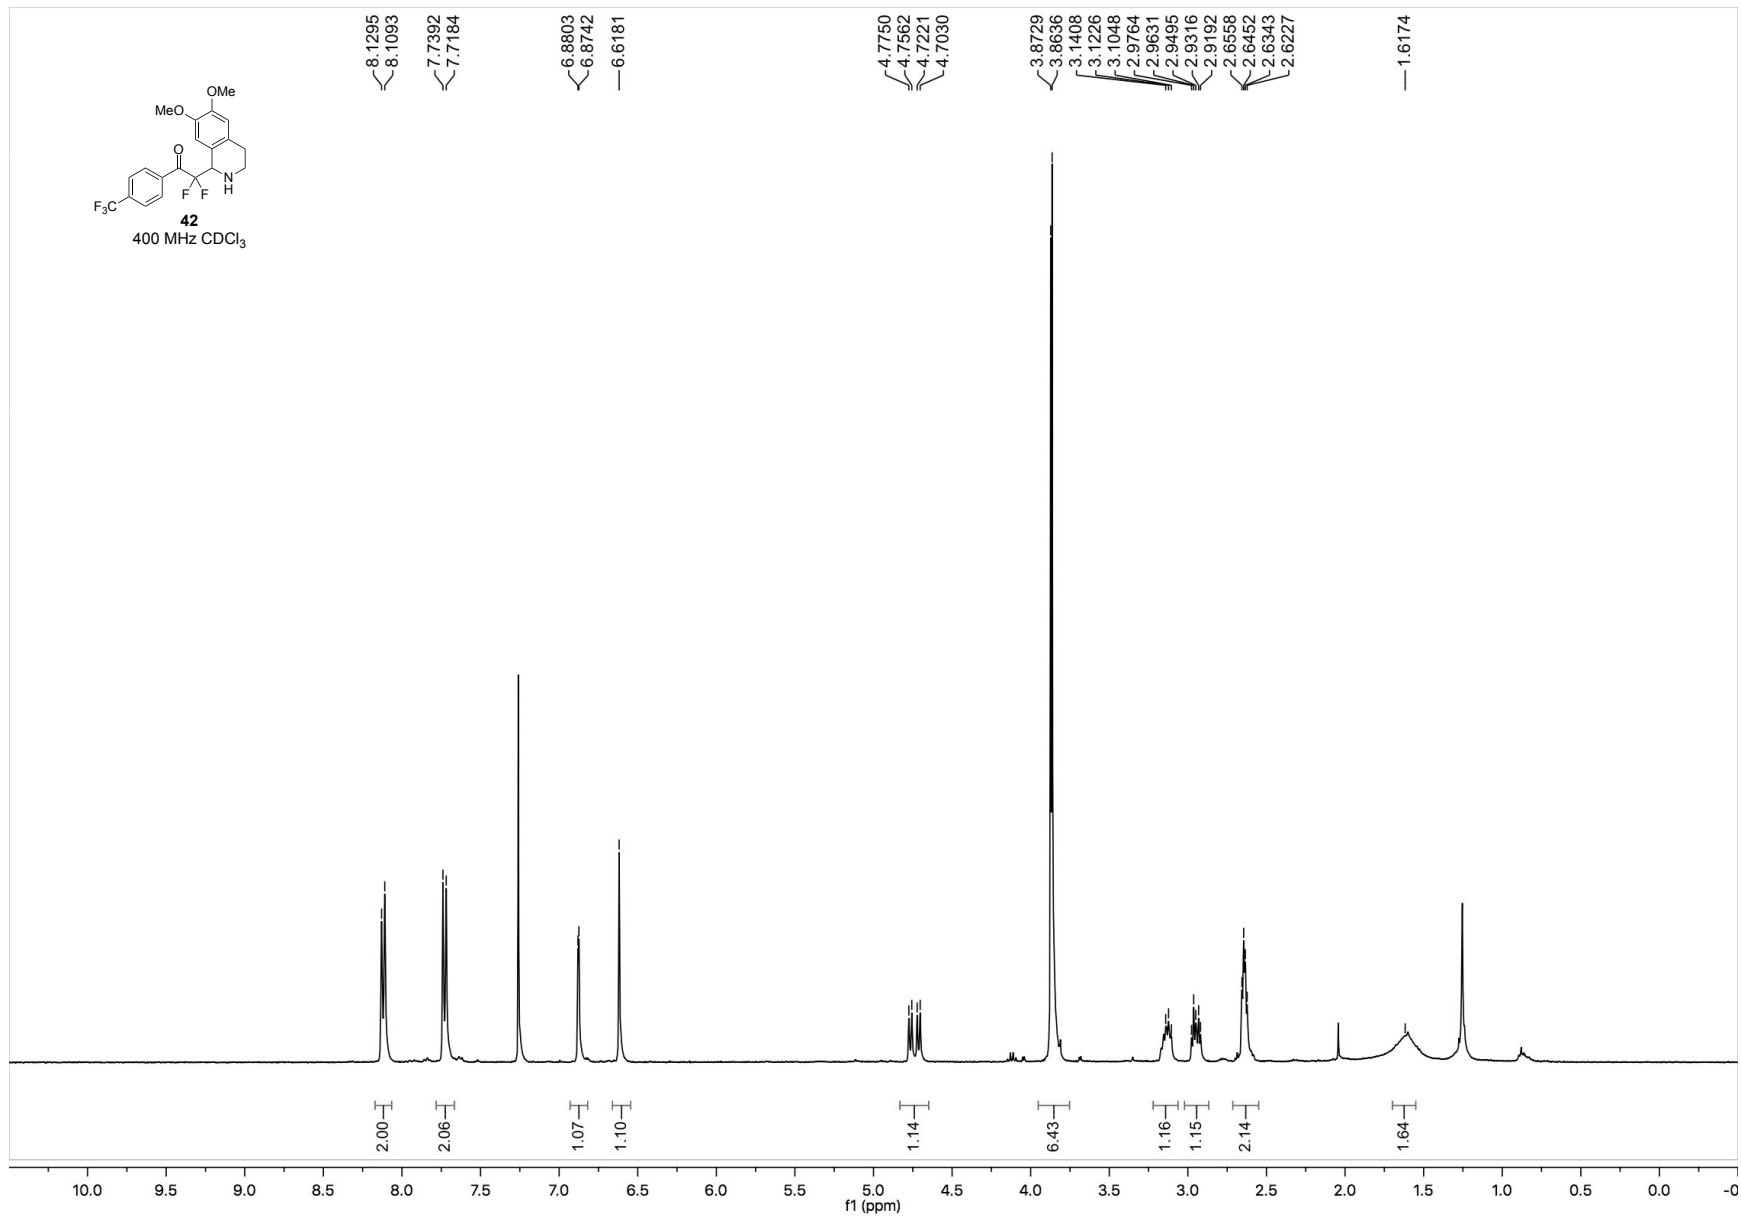

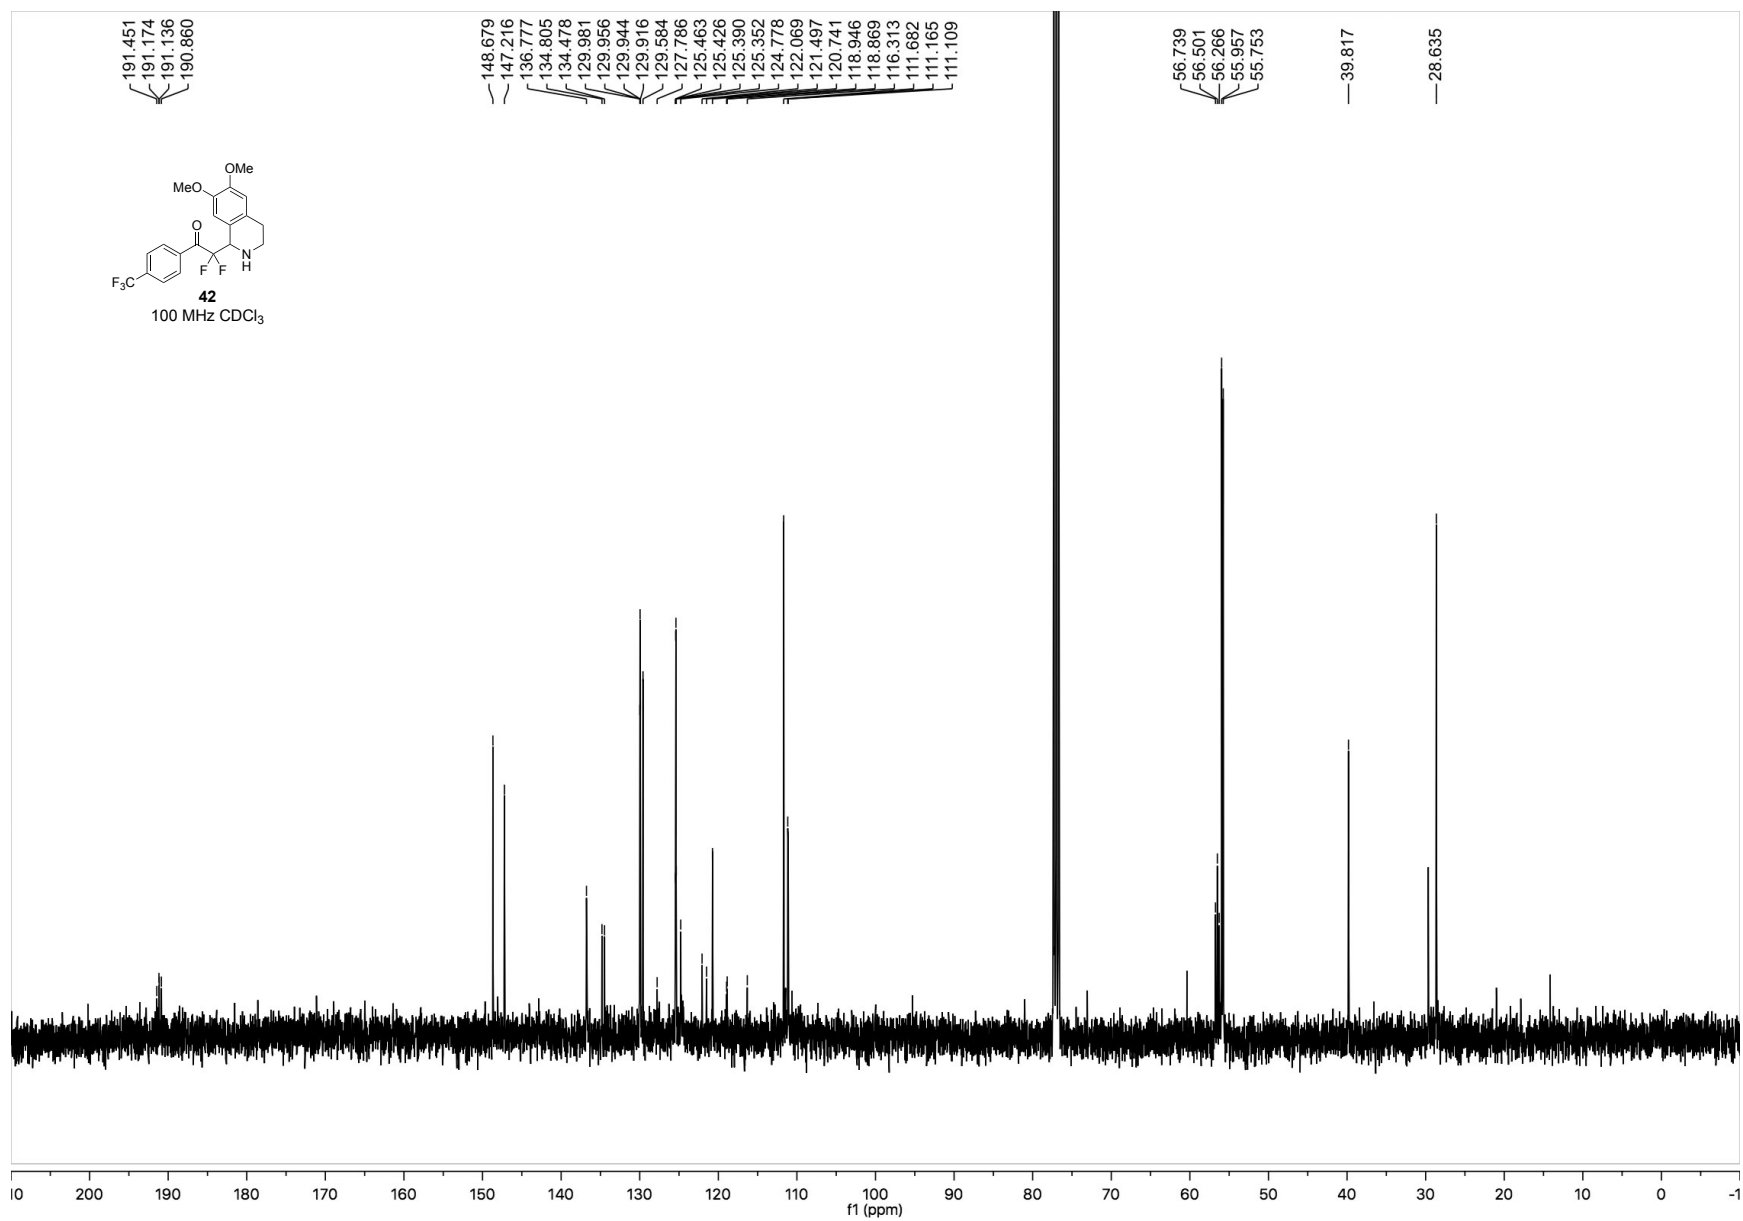

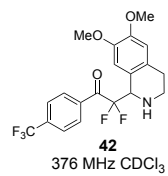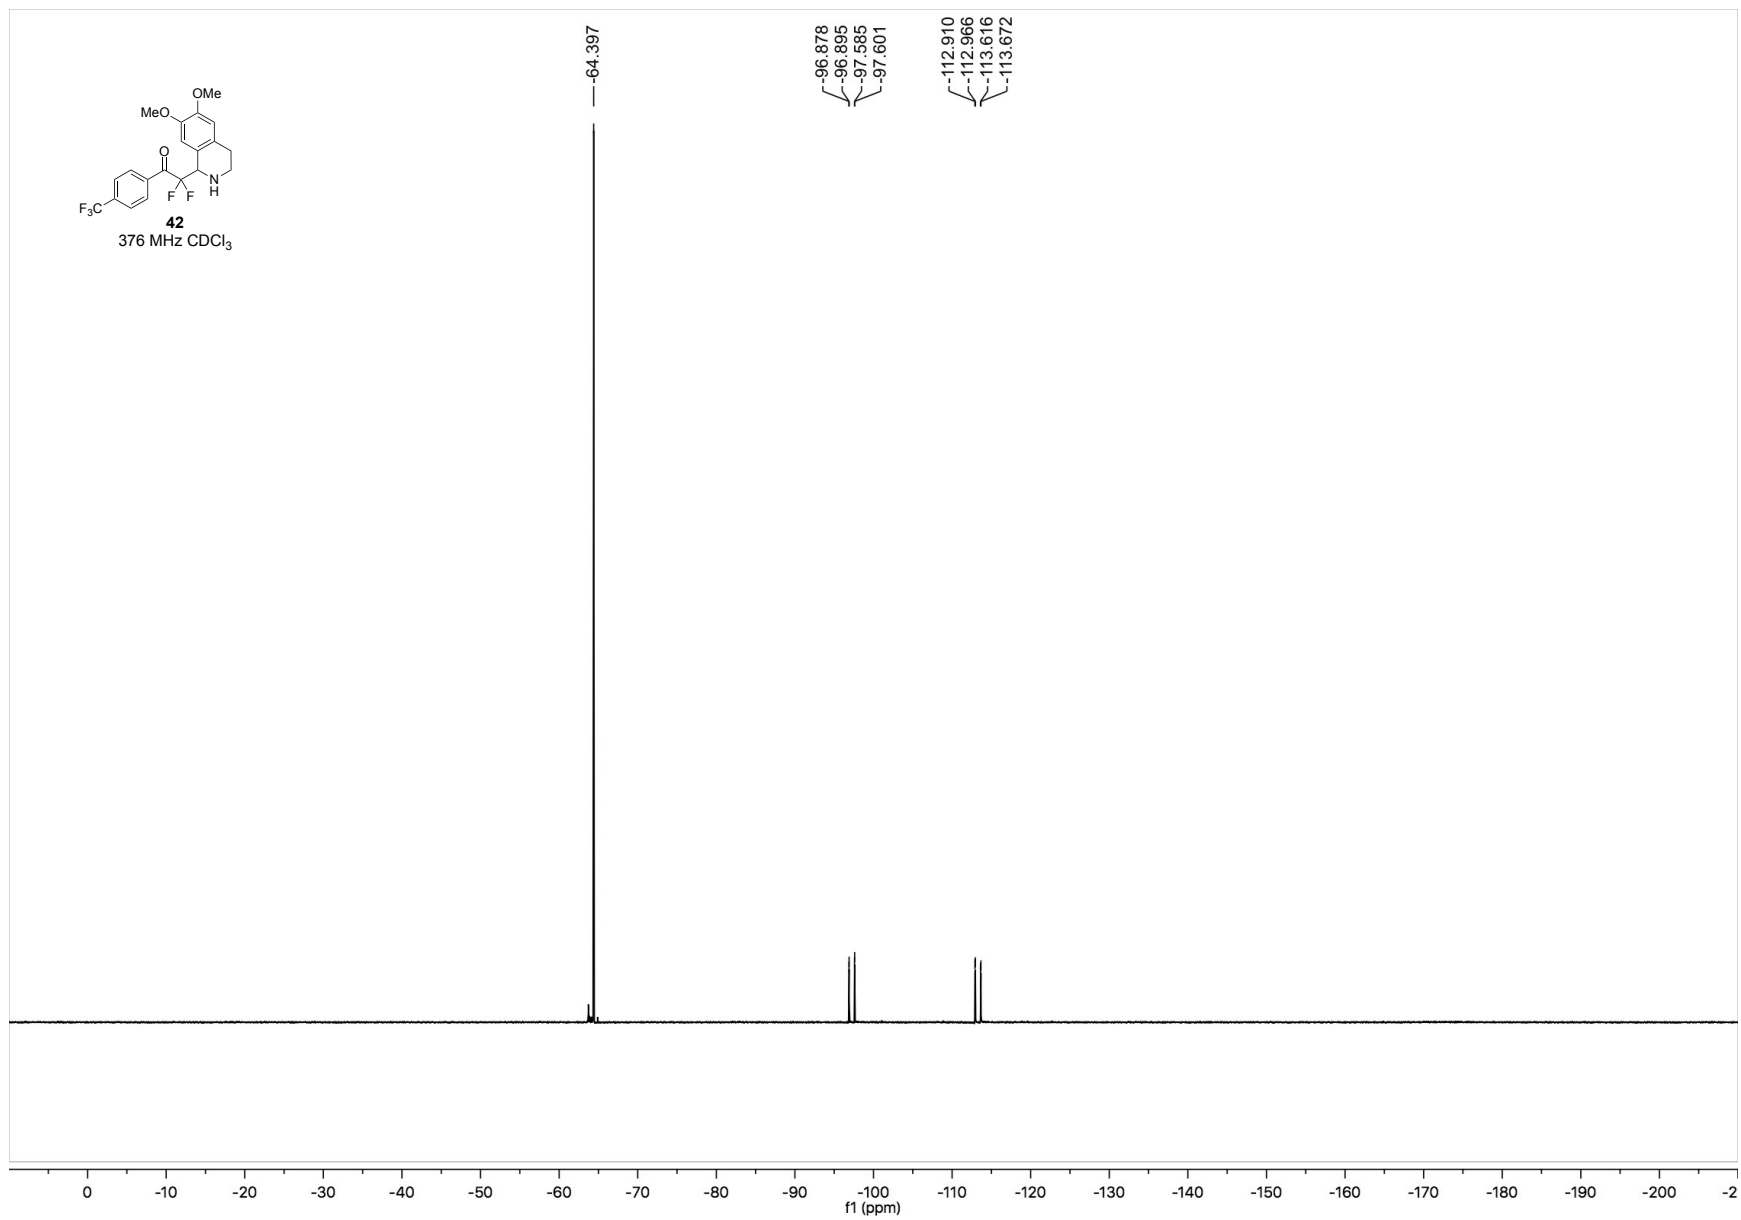



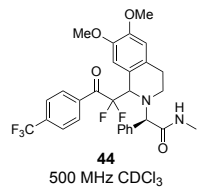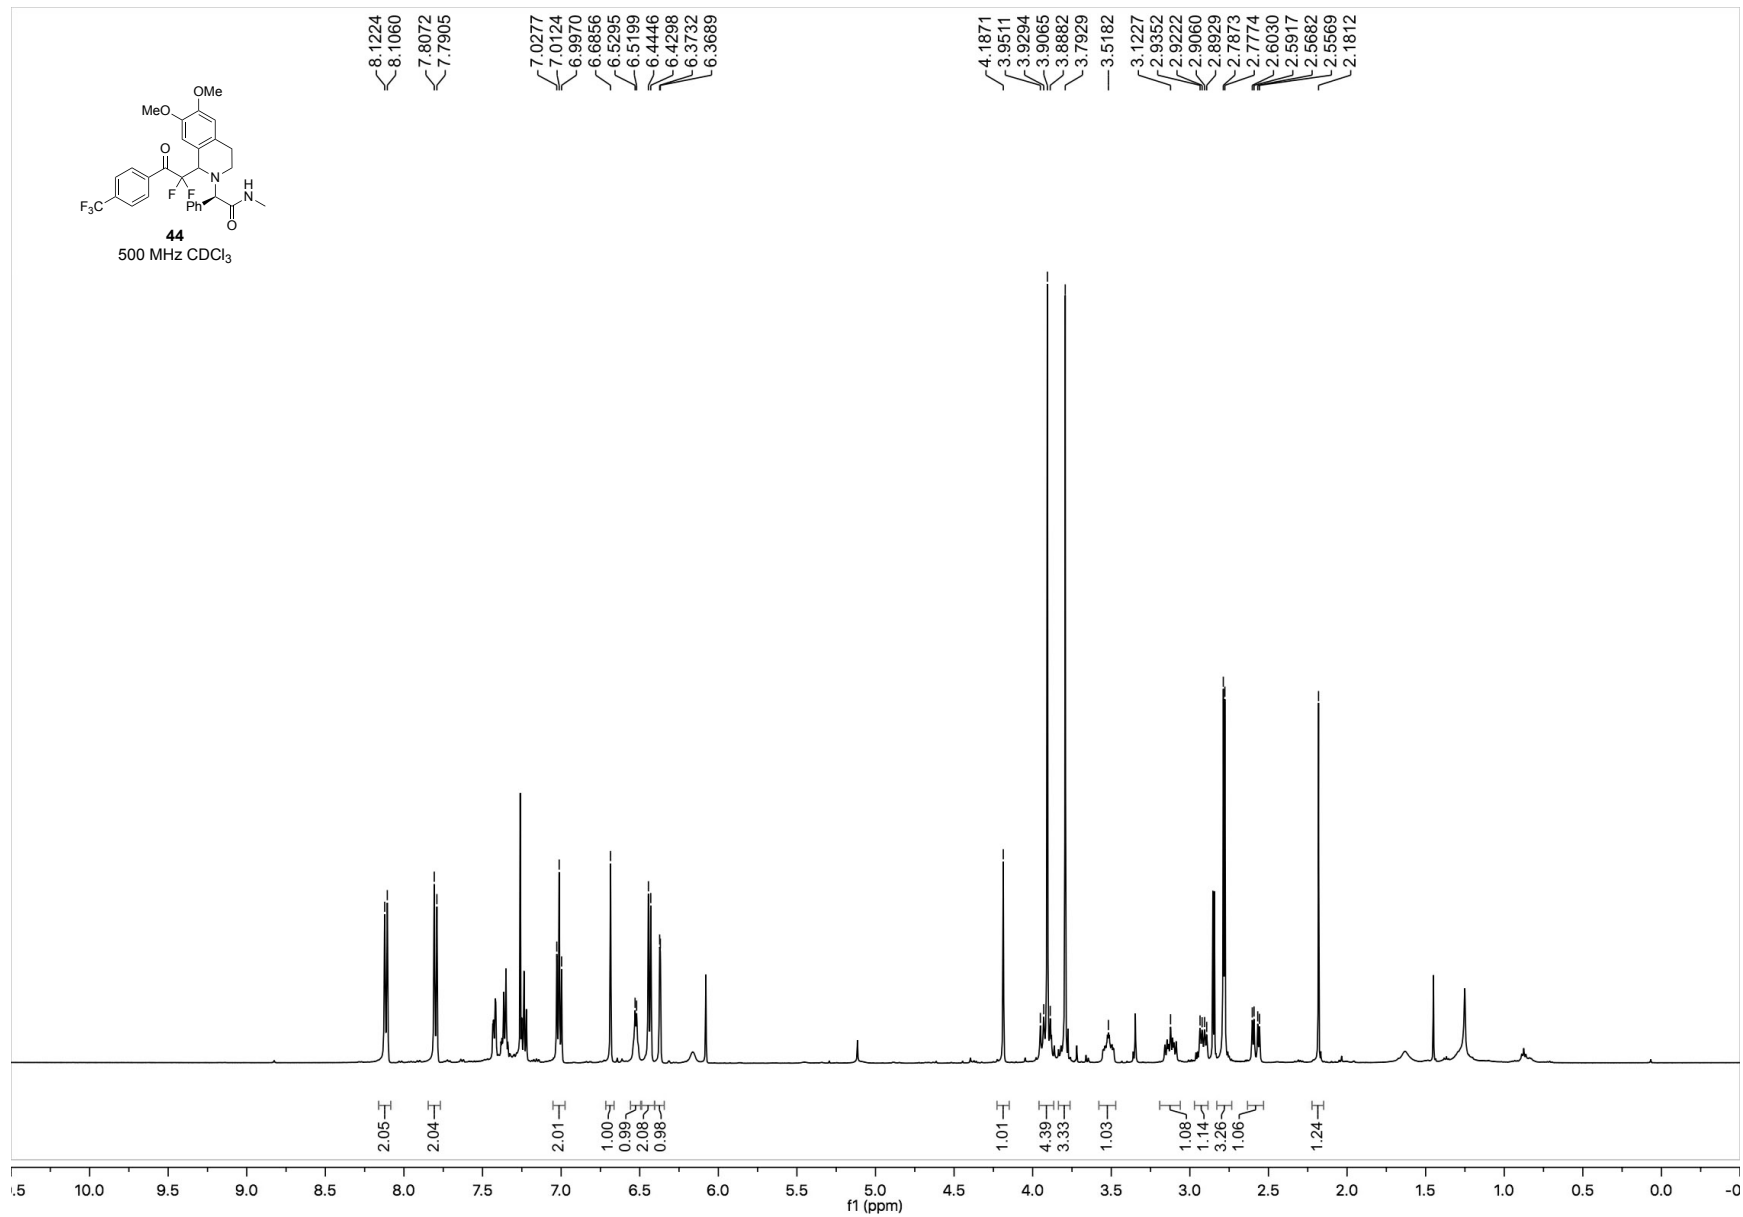

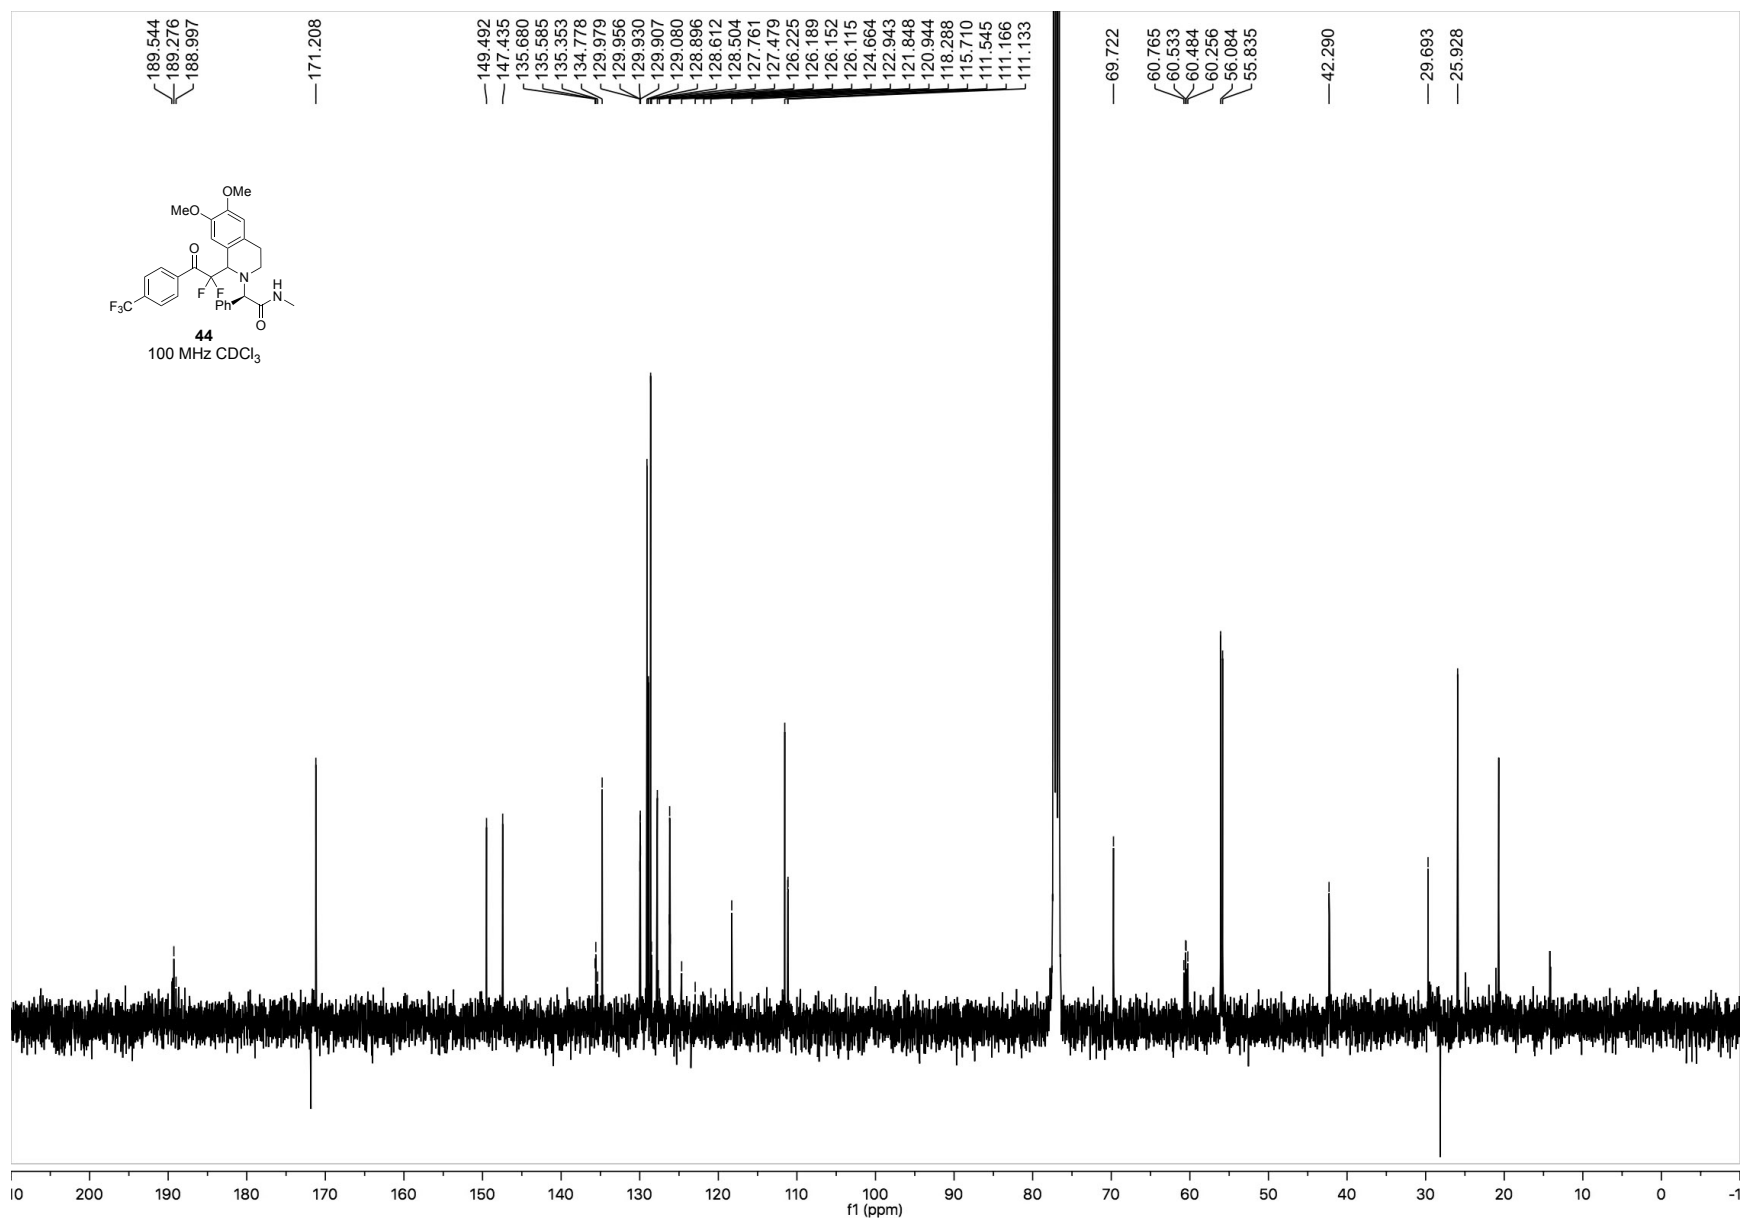

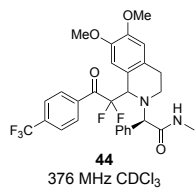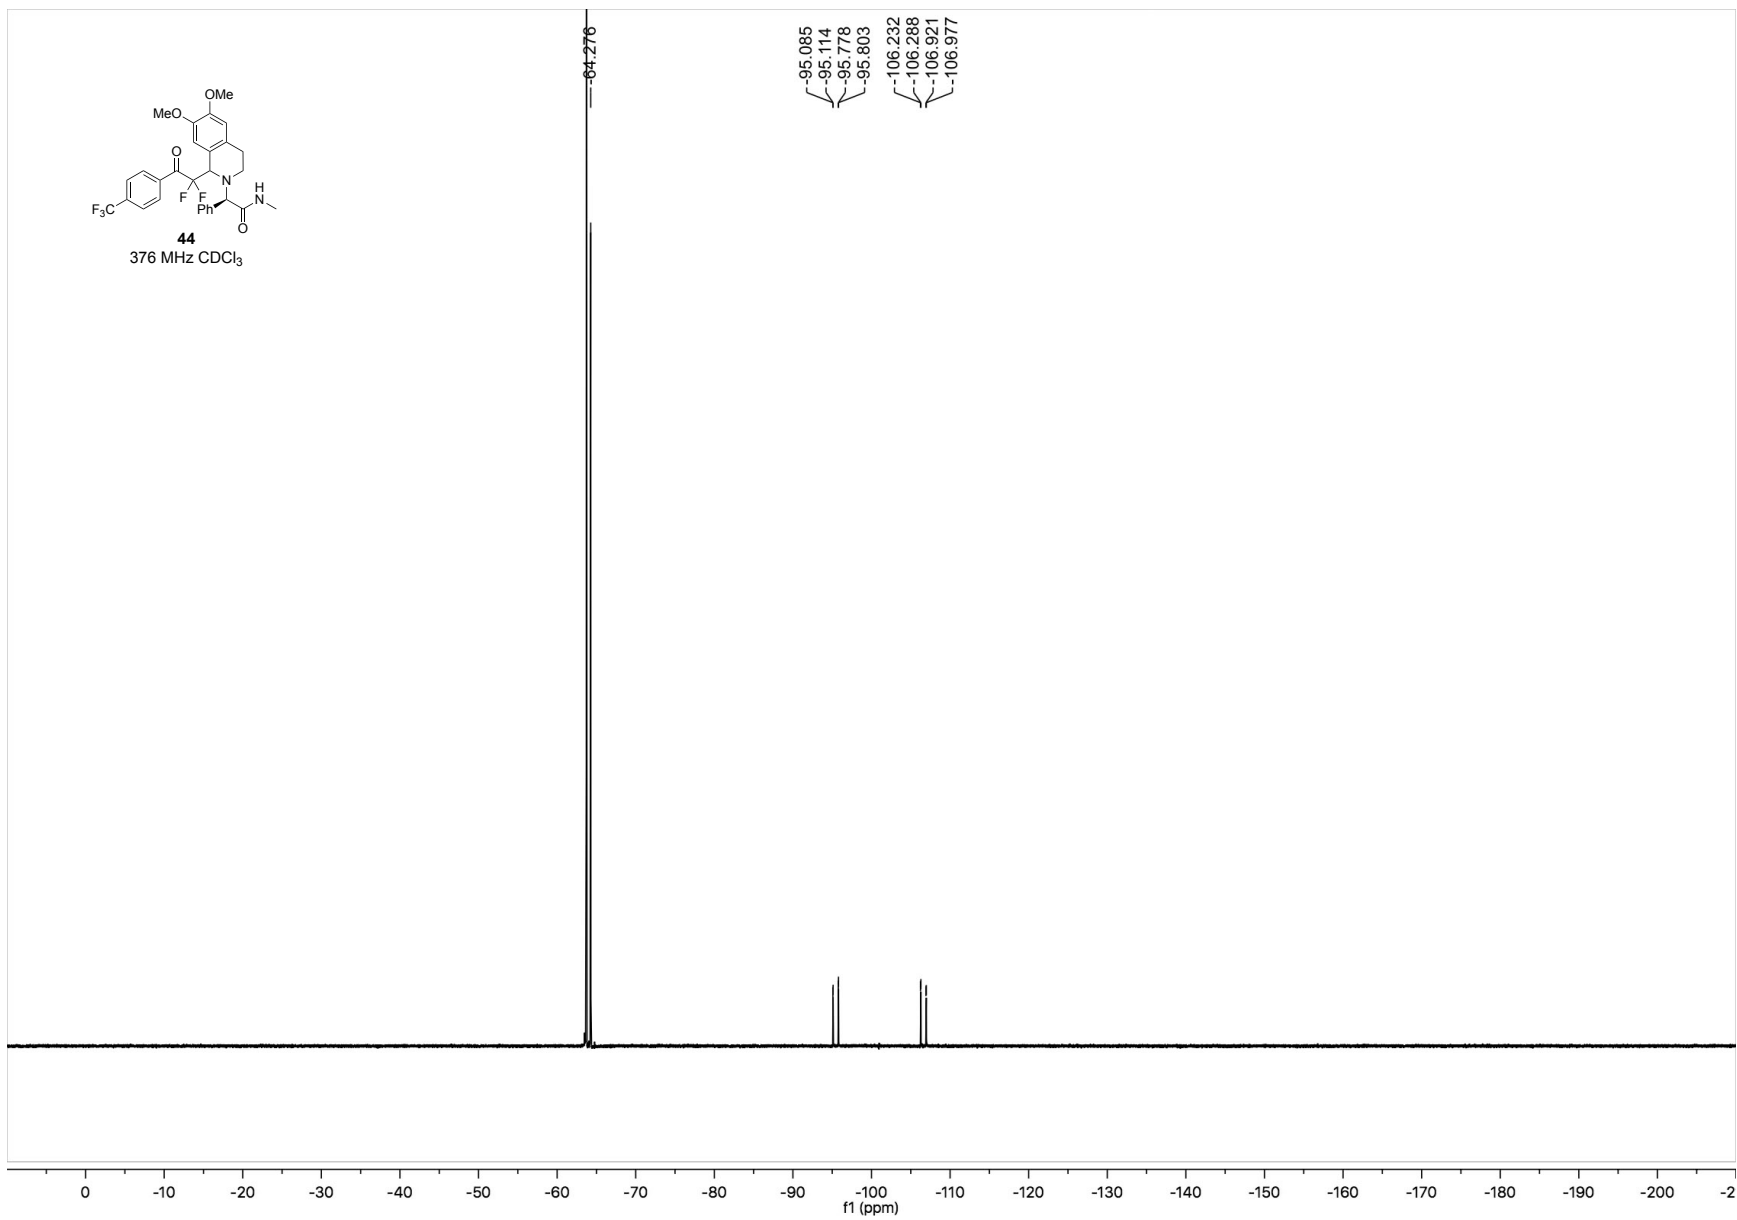

Supplement: NIHMS1716712-supplement-SI.pdf [file NIHMS1716712-supplement-SI.pdf]
